# Supplementary material for: Reinvestigation of the ν3–ν6 Coriolis interaction in trifluoroiodomethane
Source: Royal Society of Chemistry journal article supplement (doi:10.1039/d4cp02640c), 2024-01-01
Supplement: d4cp02640c1.pdf [file d4cp02640c1.pdf]

## Supplementary Information for

### Reinvestigation of the $\nu_3$ – $\nu_6$ Coriolis Interaction in Trifluoroiodomethane

Arun Bhujel,<sup>1†</sup> Salma Akter,<sup>1†</sup> Muhammad Qasim Ali,<sup>1</sup> G. Barratt Park<sup>1,2\*</sup>

#### Affiliations

<sup>1</sup>Department of Chemistry and Biochemistry, Texas Tech University, Lubbock, Texas 79409,  
United States

<sup>2</sup>Department of Dynamics at Surfaces, Max Planck Institute for Multidisciplinary Sciences,  
Göttingen 37077, Germany

<sup>†</sup>These authors contributed equally.

\*barratt.park@ttu.edu

## Computational results

The optimized equilibrium geometries obtained from *ab initio* calculations are shown in Table S1. Quartic centrifugal distortion constants and Coriolis zeta parameters obtained from harmonic force field calculations are compared with experimental values in Table S2. Ground-state rotational constants, vibration-rotation constants, and fundamental frequencies obtained from cubic force field calculations are compared with experimental values in Table S3. Note that the full cubic and semidiagonal quartic force field was calculated (using the ANHARM=VPT2 keyword in CFOUR) only when using Hartree-Fock (HF) and Second-Order Møller-Plesset (MP2) methods. In our CCSD calculations, only the cubic force field constants required to calculate vibration-rotation interaction constants were calculated (using the ANHARM=VIBROT keyword in CFOUR). In the CCSD(T) calculations, only the harmonic force field was calculated.

**Table S1.** Optimized equilibrium geometries of CF<sub>3</sub>I obtained from *ab initio* calculations. The dihedral angle is constrained to 120° (C<sub>3v</sub> geometry).

| Param.                           | Hartree-Fock |        |          | MP2    |        |          | CCSD   |        |          | CCSD(T) |        |          |
|----------------------------------|--------------|--------|----------|--------|--------|----------|--------|--------|----------|---------|--------|----------|
|                                  | 3-21G        | 6-311G | 6-311G** | 3-21G  | 6-311G | 6-311G** | 3-21G  | 6-311G | 6-311G** | 3-21G   | 6-311G | 6-311G** |
| $r_{\text{CI}}/\text{Å}$         | 2.1797       | 2.1361 | 2.1491   | 2.2140 | 2.1492 | 2.1654   | 2.2120 | 2.1573 | 2.1674   | 2.2287  | 2.1640 | 2.1766   |
| $r_{\text{CF}}/\text{Å}$         | 1.3407       | 1.3550 | 1.3051   | 1.3667 | 1.3975 | 1.3275   | 1.3646 | 1.3918 | 1.3253   | 1.3684  | 1.3972 | 1.3292   |
| $\theta_{\text{ICF}}/\text{deg}$ | 110.66       | 111.41 | 110.57   | 110.26 | 111.50 | 110.34   | 110.27 | 111.43 | 110.48   | 110.21  | 111.41 | 110.40   |

**Table S2.** Ground-state quartic centrifugal distortion parameters and Coriolis zeta parameters of <sup>12</sup>CF<sub>3</sub>I calculated from *ab initio* harmonic force fields are compared with experimentally determined values.

| Param.              | MP2    |        |          | CCSD   |        |          | CCSD(T) |        |          | Expt.                   |
|---------------------|--------|--------|----------|--------|--------|----------|---------|--------|----------|-------------------------|
|                     | 3-21G  | 6-311G | 6-311G** | 3-21G  | 6-311G | 6-311G** | 3-21G   | 6-311G | 6-311G** |                         |
| $D_J/\text{kHz}$    | 0.1526 | 0.1437 | 0.1588   | 0.1553 | 0.1462 | 0.1580   | 0.1605  | 0.1496 | 0.1641   | 0.16462(2) <sup>a</sup> |
| $D_{JK}/\text{kHz}$ | 0.8294 | 0.8208 | 0.8552   | 0.8450 | 0.8242 | 0.8611   | 0.8529  | 0.8322 | 0.8703   | 0.9925(4) <sup>a</sup>  |
| $D_K/\text{kHz}$    | 0.3124 | 0.4240 | 0.3194   | 0.3034 | 0.4087 | 0.3097   | 0.3028  | 0.4161 | 0.3100   |                         |
| $\zeta_{66}^{(a)}$  | 0.1295 | 0.1288 | 0.1319   | 0.1323 | 0.1313 | 0.1319   | 0.1320  | 0.1327 | 0.1341   | 0.13765(9) <sup>b</sup> |
| $\zeta_{36}^{(b)}$  | 0.4011 | 0.4123 | 0.3996   | 0.3989 | 0.4073 | 0.3945   | 0.3972  | 0.4090 | 0.3963   |                         |

<sup>a</sup>Ref. 1.

<sup>b</sup>This work.

## References

1. S. W. Walters, D. H. Whiffen, "Rotational spectrum of trifluoriodomethane" *Journal of the Chemical Society, Faraday Transactions 2: Molecular and Chemical Physics* **79**, 941-949 (1983), <https://doi.org/10.1039/F29837900941>.
