# Supplementary material for: Reinvestigation of the ν3–ν6 Coriolis interaction in trifluoroiodomethane
Source: Royal Society of Chemistry journal article supplement (doi:10.1039/d4cp02640c), 2024-01-01
Supplement: d4cp02640c2.xlsx [file d4cp02640c2.xlsx]

## Sheet: v3v6LineList
J'	K'	L'	F'	S'	v'	J''	K"	L"	F''	S''	v''	Obs. Freq. (MHz)	Msmt Error (MHz)	Calc. Freq. (MHz)	o-c (MHz)
12	1	1	10.5	A1	v6	11	1	1	9.5	A2	v6	36452.3	0.05	36452.3	-0.0184
12	1	1	9.5	A1	v6	11	1	1	8.5	A2	v6	36456	0.05	36456	-0.0023
12	1	1	12.5	A1	v6	11	1	1	11.5	A2	v6	36458.4	0.05	36458.4	0.0131
12	1	1	14.5	A1	v6	11	1	1	13.5	A2	v6	36461.6	0.05	36461.6	0.0052
12	1	1	13.5	A1	v6	11	1	1	12.5	A2	v6	36462.2	0.05	36462.2	-0.0377
12	1	1	10.5	A2	v6	11	1	1	9.5	A1	v6	36522.8	0.05	36522.8	-0.0089
12	1	1	11.5	A2	v6	11	1	1	10.5	A1	v6	36524.4	0.05	36524.4	0.0112
12	1	1	12.5	A2	v6	11	1	1	11.5	A1	v6	36528.8	0.05	36528.8	0.0637
12	1	1	13.5	A2	v6	11	1	1	12.5	A1	v6	36532.6	0.05	36532.6	0.0261
12	1	1	14.5	A2	v6	11	1	1	13.5	A1	v6	36532	0.05	36532	0.014
12	0	1	9.5	E	v6	11	0	1	8.5	E	v6	36489.6	0.05	36489.5	0.0435
12	0	1	10.5	E	v6	11	0	1	9.5	E	v6	36486.8	0.05	36486.8	0.0129
12	1	-1	9.5	E	v6	11	1	-1	8.5	E	v6	36491.6	0.05	36491.6	0.0129
12	1	-1	11.5	E	v6	11	1	-1	10.5	E	v6	36489.6	0.05	36489.5	0.0153
12	1	-1	10.5	E	v6	11	1	-1	9.5	E	v6	36487.9	0.05	36487.9	-0.0036
12	2	-1	14.5	A1	v6	11	2	-1	13.5	A2	v6	36500.1	0.05	36500	0.0477
12	3	1	11.5	E	v6	11	3	1	10.5	E	v6	36484.4	0.05	36484.4	0.0323
12	3	1	12.5	E	v6	11	3	1	11.5	E	v6	36486.3	0.05	36486.3	-0.0159
12	3	1	13.5	E	v6	11	3	1	12.5	E	v6	36492.9	0.05	36492.8	0.0197
12	3	1	14.5	E	v6	11	3	1	13.5	E	v6	36502.6	0.05	36502.6	-0.0037
12	3	-1	9.5	E	v6	11	3	-1	8.5	E	v6	36501.4	0.05	36501.4	-0.0114
12	3	-1	10.5	E	v6	11	3	-1	9.5	E	v6	36490.2	0.05	36490.2	0.0079
12	3	-1	12.5	E	v6	11	3	-1	11.5	E	v6	36488.2	0.05	36488.1	0.0322
12	3	-1	13.5	E	v6	11	3	-1	12.5	E	v6	36494.7	0.05	36494.7	0.0234
12	3	-1	14.5	E	v6	11	3	-1	13.5	E	v6	36504.4	0.05	36504.4	0.0462
12	4	1	9.5	A1	v6	11	4	1	8.5	A2	v6	36506.6	0.05	36506.6	0.0261
12	4	1	11.5	A1	v6	11	4	1	10.5	A2	v6	36479.7	0.1	36479.8	-0.0838
12	4	1	12.5	A1	v6	11	4	1	11.5	A2	v6	36479.7	0.1	36479.6	0.0593
12	4	1	13.5	A1	v6	11	4	1	12.5	A2	v6	36488.6	0.05	36488.6	-0.0146
12	4	1	14.5	A1	v6	11	4	1	13.5	A2	v6	36507.3	0.05	36507.3	0.0333
12	4	-1	9.5	E	v6	11	4	-1	8.5	E	v6	36509.5	0.05	36509.5	0.0173
12	4	-1	11.5	E	v6	11	4	-1	10.5	E	v6	36482.7	0.05	36482.7	-0.0057
12	4	-1	13.5	E	v6	11	4	-1	12.5	E	v6	36491.6	0.07	36491.5	0.0579
12	4	-1	14.5	E	v6	11	4	-1	13.5	E	v6	36510.2	0.05	36510.2	0.0361
12	5	-1	9.5	A1	v6	11	5	-1	8.5	A2	v6	36519.9	0.05	36519.8	0.02
12	5	-1	10.5	A1	v6	11	5	-1	9.5	A2	v6	36493.5	0.05	36493.5	-0.0109
12	5	-1	11.5	A1	v6	11	5	-1	10.5	A2	v6	36478.1	0.05	36478.1	0.0068
12	5	-1	12.5	A1	v6	11	5	-1	11.5	A2	v6	36475.3	0.05	36475.3	0.0161
12	5	-1	13.5	A1	v6	11	5	-1	12.5	A2	v6	36487.4	0.05	36487.3	0.0248
12	5	-1	14.5	A1	v6	11	5	-1	13.5	A2	v6	36517.6	0.05	36517.5	0.0453
12	5	1	9.5	E	v6	11	5	1	8.5	E	v6	36515.9	0.05	36515.9	-0.0015
12	5	1	10.5	E	v6	11	5	1	9.5	E	v6	36489.6	0.05	36489.6	-0.028
12	5	1	11.5	E	v6	11	5	1	10.5	E	v6	36474.1	0.05	36474.1	-0.0104
12	5	1	12.5	E	v6	11	5	1	11.5	E	v6	36471.3	0.05	36471.3	0.0016
12	5	1	13.5	E	v6	11	5	1	12.5	E	v6	36483.4	0.05	36483.4	-0.0071
12	5	1	14.5	E	v6	11	5	1	13.5	E	v6	36513.6	0.05	36513.6	0.0001
12	7	-1	9.5	E	v6	11	7	-1	8.5	E	v6	36547.3	0.05	36547.3	-0.0111
12	7	-1	10.5	E	v6	11	7	-1	9.5	E	v6	36498	0.05	36497.9	0.0182
12	7	-1	11.5	E	v6	11	7	-1	10.5	E	v6	36465.2	0.05	36465.2	-0.0032
12	7	-1	12.5	E	v6	11	7	-1	11.5	E	v6	36455.5	0.05	36455.5	-0.0028
12	7	-1	13.5	E	v6	11	7	-1	12.5	E	v6	36476.2	0.07	36476.2	0.0398
12	7	-1	14.5	E	v6	11	7	-1	13.5	E	v6	36536.5	0.07	36536.5	0.0139
12	7	1	10.5	A1	v6	11	7	1	9.5	A2	v6	36492	0.05	36492.1	-0.0691
12	7	1	11.5	A1	v6	11	7	1	10.5	A2	v6	36459.4	0.05	36459.4	-0.0192
12	7	1	12.5	A1	v6	11	7	1	11.5	A2	v6	36449.6	0.05	36449.6	-0.0387
12	7	1	13.5	A1	v6	11	7	1	12.5	A2	v6	36470.3	0.05	36470.3	-0.0045
12	7	1	14.5	A1	v6	11	7	1	13.5	A2	v6	36530.6	0.05	36530.7	-0.0264
12	6	-1	11.5	E	v6	11	6	-1	10.5	E	v6	36472.3	0.05	36472.2	0.0153
12	6	-1	12.5	E	v6	11	6	-1	11.5	E	v6	36466.2	0.05	36466.2	0.0064
12	6	-1	13.5	E	v6	11	6	-1	12.5	E	v6	36482.2	0.05	36482.2	0.0202
12	6	1	10.5	E	v6	11	6	1	9.5	E	v6	36490.7	0.07	36490.7	-0.0188
12	6	1	11.5	E	v6	11	6	1	10.5	E	v6	36467.3	0.05	36467.3	-0.0201
12	6	1	12.5	E	v6	11	6	1	11.5	E	v6	36461.3	0.05	36461.3	-0.0331
12	6	1	13.5	E	v6	11	6	1	12.5	E	v6	36477.3	0.05	36477.3	0.0128
12	6	1	14.5	E	v6	11	6	1	13.5	E	v6	36521.4	0.05	36521.4	-0.0205
12	8	1	11.5	E	v6	11	8	1	10.5	E	v6	36450.1	0.05	36450.2	-0.0529
12	8	1	13.5	E	v6	11	8	1	12.5	E	v6	36462.4	0.05	36462.5	-0.0304
12	8	1	14.5	E	v6	11	8	1	13.5	E	v6	36541.4	0.07	36541.4	0.0092
12	8	-1	9.5	A1	v6	11	8	-1	8.5	A2	v6	36564.6	0.05	36564.6	-0.0054
12	8	-1	10.5	A1	v6	11	8	-1	9.5	A2	v6	36500.6	0.05	36500.6	-0.0126
12	8	-1	11.5	A1	v6	11	8	-1	10.5	A2	v6	36456.9	0.05	36457	-0.0297
12	8	-1	12.5	A1	v6	11	8	-1	11.5	A2	v6	36443	0.05	36443	0.0044
12	8	-1	13.5	A1	v6	11	8	-1	12.5	A2	v6	36469.3	0.05	36469.3	0.0185
12	8	-1	14.5	A1	v6	11	8	-1	13.5	A2	v6	36548.2	0.05	36548.1	0.0132
12	9	1	9.5	E	v6	11	9	1	8.5	E	v6	36576.5	0.05	36576.6	-0.0412
12	9	1	11.5	E	v6	11	9	1	10.5	E	v6	36439.7	0.05	36439.8	-0.0516
12	9	-1	9.5	E	v6	11	9	-1	8.5	E	v6	36584.2	0.05	36584.3	-0.0219
12	9	-1	11.5	E	v6	11	9	-1	10.5	E	v6	36447.4	0.05	36447.5	-0.0388
12	10	1	13.5	A1	v6	11	10	1	12.5	A2	v6	36444.4	0.05	36444.5	-0.0617
12	10	-1	9.5	E	v6	11	10	-1	8.5	E	v6	36606.4	0.05	36606.5	-0.0439
12	10	-1	12.5	E	v6	11	10	-1	11.5	E	v6	36412.9	0.05	36412.9	-0.0166
12	10	-1	13.5	E	v6	11	10	-1	12.5	E	v6	36453.1	0.05	36453.1	-0.0636
12	10	-1	14.5	E	v6	11	10	-1	13.5	E	v6	36575.5	0.05	36575.5	-0.0109
12	11	-1	9.5	A1	v6	11	11	-1	8.5	A2	v6	36631.2	0.05	36631.2	-0.0573
12	11	-1	13.5	A1	v6	11	11	-1	12.5	A2	v6	36444	0.05	36444	-0.0368
24	1	1	22.5	A1	v6	23	1	1	21.5	A2	v6	72908.5	0.2	72908.5	0.0529
24	1	1	23.5	A1	v6	23	1	1	22.5	A2	v6	72909.2	0.3	72909.1	0.1646
24	1	1	21.5	A1	v6	23	1	1	20.5	A2	v6	72909.2	0.3	72909.2	-0.0195
24	1	1	24.5	A1	v6	23	1	1	23.5	A2	v6	72910.2	0.2	72910.2	0.0568
24	1	1	26.5	A1	v6	23	1	1	25.5	A2	v6	72910.8	0.2	72910.7	0.0935
24	0	1	24.5	E	v6	23	0	1	23.5	E	v6	72973.1	0.2	72973	0.1734
24	0	1	21.5	E	v6	23	0	1	20.5	E	v6	72971.9	0.3	72971.8	0.0586
24	0	1	23.5	E	v6	23	0	1	22.5	E	v6	72971.9	0.3	72971.8	0.0416
24	1	-1	23.5	E	v6	23	1	-1	22.5	E	v6	72977	0.3	72976.8	0.1656
24	1	-1	22.5	E	v6	23	1	-1	21.5	E	v6	72976.4	0.2	72976.2	0.1573
24	4	1	21.5	A1	v6	23	4	1	20.5	A2	v6	72980.9	0.2	72980.9	0.062
24	4	1	24.5	A1	v6	23	4	1	23.5	A2	v6	72978.4	0.2	72978.4	0.0562
24	7	1	26.5	A1	v6	23	7	1	25.5	A2	v6	72979.6	0.2	72979.6	0.0021
24	7	1	25.5	A1	v6	23	7	1	24.5	A2	v6	72972.7	0.2	72972.7	0.0284
24	7	1	22.5	A1	v6	23	7	1	21.5	A2	v6	72972.2	0.2	72972.2	0.0489
24	7	1	24.5	A1	v6	23	7	1	23.5	A2	v6	72969.1	0.2	72969.1	-0.0194
24	7	1	23.5	A1	v6	23	7	1	22.5	A2	v6	72968.8	0.2	72968.9	-0.0482
24	10	1	22.5	A1	v6	23	10	1	21.5	A2	v6	72965.9	0.2	72966	-0.0511
24	10	1	25.5	A1	v6	23	10	1	24.5	A2	v6	72964.4	0.2	72964.4	-0.0269
24	10	1	23.5	A1	v6	23	10	1	22.5	A2	v6	72958.6	0.2	72958.6	-0.0458
24	13	1	21.5	A1	v6	23	13	1	20.5	A2	v6	72981.3	0.2	72981.4	-0.0929
24	13	1	26.5	A1	v6	23	13	1	25.5	A2	v6	72979.3	0.2	72979.3	-0.0601
24	13	1	23.5	A1	v6	23	13	1	22.5	A2	v6	72945.9	0.2	72946	-0.0901
24	13	1	24.5	A1	v6	23	13	1	23.5	A2	v6	72944	0.2	72944	-0.0609
37	1	1	35.5	A2	v6	36	1	1	34.5	A1	v6	112384	0.3	112383	0.3802
37	1	1	36.5	A2	v6	36	1	1	35.5	A1	v6	112384	0.3	112384	0.1174
37	1	1	34.5	A2	v6	36	1	1	33.5	A1	v6	112384	0.3	112384	0.0885
37	1	1	37.5	A2	v6	36	1	1	36.5	A1	v6	112384	0.3	112384	0.3665
37	1	1	39.5	A2	v6	36	1	1	38.5	A1	v6	112384	0.3	112384	0.2162
37	1	1	38.5	A2	v6	36	1	1	37.5	A1	v6	112384	0.3	112384	0.0276
37	2	1	37.5	E+	v6	36	2	1	36.5	E+	v6	112521	0.3	112521	0.3623
37	2	1	38.5	E+	v6	36	2	1	37.5	E+	v6	112522	0.3	112521	0.3927
37	2	1	39.5	E+	v6	36	2	1	38.5	E+	v6	112522	0.3	112521	0.4674
37	2	1	34.5	E+	v6	36	2	1	33.5	E+	v6	112521	0.3	112521	0.123
37	2	1	35.5	E+	v6	36	2	1	34.5	E+	v6	112521	0.3	112520	0.516
37	2	1	36.5	E+	v6	36	2	1	35.5	E+	v6	112521	0.3	112520	0.3133
37	3	1	35.5	E+	v6	36	3	1	34.5	E+	v6	112504	0.3	112504	0.3594
37	3	1	36.5	E+	v6	36	3	1	35.5	E+	v6	112504	0.3	112504	0.263
37	3	1	34.5	E+	v6	36	3	1	33.5	E+	v6	112504	0.3	112504	0.2948
37	3	1	37.5	E+	v6	36	3	1	36.5	E+	v6	112504	0.3	112504	0.3219
37	3	1	38.5	E+	v6	36	3	1	37.5	E+	v6	112505	0.3	112505	0.4652
37	3	1	39.5	E+	v6	36	3	1	38.5	E+	v6	112505	0.3	112505	0.3361
37	14	-1	34.5	A1	v6	36	14	-1	33.5	A2	v6	112499	0.6	112500	-0.2295
37	14	-1	39.5	A1	v6	36	14	-1	38.5	A2	v6	112499	0.6	112500	-0.1446
37	4	1	34.5	A1	v6	36	4	1	33.5	A2	v6	112498	0.3	112497	0.2757
37	4	1	38.5	A1	v6	36	4	1	37.5	A2	v6	112498	0.3	112497	0.1369
37	4	1	36.5	A1	v6	36	4	1	35.5	A2	v6	112497	0.3	112496	0.222
37	4	1	35.5	A1	v6	36	4	1	34.5	A2	v6	112497	0.3	112497	0.1712
37	8	-1	38.5	A1	v6	36	8	-1	37.5	A2	v6	112495	0.3	112495	0.1448
37	8	-1	35.5	A1	v6	36	8	-1	34.5	A2	v6	112495	0.3	112494	0.1449
37	11	-1	38.5	A1	v6	36	11	-1	37.5	A2	v6	112495	0.3	112494	0.038
37	5	-1	39.5	A1	v6	36	5	-1	38.5	A2	v6	112494	0.5	112494	0.0286
37	8	-1	37.5	A1	v6	36	8	-1	36.5	A2	v6	112494	0.5	112494	0.1655
37	5	-1	38.5	A1	v6	36	5	-1	37.5	A2	v6	112493	0.5	112493	0.2031
37	5	-1	35.5	A1	v6	36	5	-1	34.5	A2	v6	112492	0.6	112492	0.0306
37	5	-1	36.5	A1	v6	36	5	-1	35.5	A2	v6	112492	0.6	112492	0.2719
37	11	-1	37.5	A1	v6	36	11	-1	36.5	A2	v6	112492	0.6	112492	-0.0375
37	11	-1	36.5	A1	v6	36	11	-1	35.5	A2	v6	112492	0.6	112492	0.0432
37	14	-1	35.5	A1	v6	36	14	-1	34.5	A2	v6	112492	0.6	112492	-0.24
37	4	-1	37.5	E+	v6	36	4	-1	36.5	E+	v6	112491	0.4	112491	0.2308
37	4	-1	35.5	E+	v6	36	4	-1	34.5	E+	v6	112491	0.5	112490	0.0705
37	4	-1	36.5	E+	v6	36	4	-1	35.5	E+	v6	112491	0.5	112490	0.1233
37	3	-1	38.5	E+	v6	36	3	-1	37.5	E+	v6	112489	0.4	112489	0.3234
37	3	-1	39.5	E+	v6	36	3	-1	38.5	E+	v6	112489	0.4	112489	0.1887
37	3	-1	37.5	E+	v6	36	3	-1	36.5	E+	v6	112489	0.4	112489	0.1767
37	3	-1	34.5	E+	v6	36	3	-1	33.5	E+	v6	112489	0.4	112489	0.1413
37	14	-1	37.5	A1	v6	36	14	-1	36.5	A2	v6	112488	0.4	112488	0.0349
37	14	-1	36.5	A1	v6	36	14	-1	35.5	A2	v6	112488	0.4	112488	-0.1296
37	17	-1	38.5	A1	v6	36	17	-1	37.5	A2	v6	112487	0.2	112488	-0.1776
37	7	1	39.5	A1	v6	36	7	1	38.5	A2	v6	112487	0.3	112487	0.1203
37	7	1	34.5	A1	v6	36	7	1	33.5	A2	v6	112486	0.3	112486	0.1598
37	2	-1	39.5	A1	v6	36	2	-1	38.5	A2	v6	112486	0.4	112486	0.1601
37	2	-1	38.5	A1	v6	36	2	-1	37.5	A2	v6	112486	0.4	112486	0.0949
37	2	-1	36.5	A1	v6	36	2	-1	35.5	A2	v6	112485	0.4	112485	0.2037
37	7	1	38.5	A1	v6	36	7	1	37.5	A2	v6	112485	0.4	112485	0.0801
37	7	1	35.5	A1	v6	36	7	1	34.5	A2	v6	112484	0.3	112484	0.1488
37	7	1	37.5	A1	v6	36	7	1	36.5	A2	v6	112484	0.3	112484	0.0672
37	7	1	36.5	A1	v6	36	7	1	35.5	A2	v6	112484	0.3	112484	0.0465
37	20	-1	35.5	A1	v6	36	20	-1	34.5	A2	v6	112483	0.3	112483	-0.4451
37	17	-1	36.5	A1	v6	36	17	-1	35.5	A2	v6	112483	0.3	112483	-0.2225
37	17	-1	37.5	A1	v6	36	17	-1	36.5	A2	v6	112482	0.2	112482	-0.2585
37	1	-1	35.5	E+	v6	36	1	-1	34.5	E+	v6	112479	0.4	112478	0.3371
37	1	-1	36.5	E+	v6	36	1	-1	35.5	E+	v6	112479	0.4	112479	0.0769
37	1	-1	34.5	E+	v6	36	1	-1	33.5	E+	v6	112479	0.4	112479	0.0423
37	19	-1	36.5	E+	v6	36	19	-1	35.5	E+	v6	112477	0.6	112478	-1.0502
37	20	-1	37.5	A1	v6	36	20	-1	36.5	A2	v6	112473	0.6	112474	-1.2051
37	21	-1	36.5	E+	v6	36	21	-1	35.5	E+	v6	112471	0.6	112472	-1.394
37	13	1	39.5	A1	v6	36	13	1	38.5	A2	v6	112469	0.3	112469	-0.0244
37	13	1	34.5	A1	v6	36	13	1	33.5	A2	v6	112469	0.3	112469	-0.0114
37	22	-1	36.5	E+	v6	36	22	-1	35.5	E+	v6	112467	0.6	112469	-1.7132
37	12	1	36.5	E+	v6	36	12	1	35.5	E+	v6	112464	0.5	112464	-0.0055
37	12	1	37.5	E+	v6	36	12	1	36.5	E+	v6	112464	0.5	112464	-0.0108
37	0	1	39.5	E+	v6	36	0	1	38.5	E+	v6	112464	0.5	112463	0.2246
37	0	1	37.5	E+	v6	36	0	1	36.5	E+	v6	112464	0.5	112463	0.3279
37	0	1	34.5	E+	v6	36	0	1	33.5	E+	v6	112463	0.5	112463	0.5988
37	0	1	36.5	E+	v6	36	0	1	35.5	E+	v6	112463	0.5	112463	0.581
37	13	1	35.5	A1	v6	36	13	1	34.5	A2	v6	112462	0.3	112462	-0.1186
37	13	1	38.5	A1	v6	36	13	1	37.5	A2	v6	112462	0.3	112462	0.0326
37	13	1	37.5	A1	v6	36	13	1	36.5	A2	v6	112459	0.3	112459	0.0145
37	13	1	36.5	A1	v6	36	13	1	35.5	A2	v6	112459	0.3	112459	-0.062
37	16	1	36.5	A1	v6	36	16	1	35.5	A2	v6	112444	0.3	112444	-0.2328
37	17	1	35.5	E+	v6	36	17	1	34.5	E+	v6	112445	0.2	112445	-0.1615
37	17	1	36.5	E+	v6	36	17	1	35.5	E+	v6	112439	0.2	112439	-0.1639
37	17	1	37.5	E+	v6	36	17	1	36.5	E+	v6	112439	0.3	112439	-0.071
37	18	1	35.5	E+	v6	36	18	1	34.5	E+	v6	112440	0.35	112440	-0.05
37	18	1	38.5	E+	v6	36	18	1	37.5	E+	v6	112439	0.3	112439	-0.1847
37	19	1	34.5	A1	v6	36	19	1	33.5	A2	v6	112448	0.2	112448	-0.2683
37	19	1	39.5	A1	v6	36	19	1	38.5	A2	v6	112447	0.2	112448	-0.2444
37	19	1	35.5	A1	v6	36	19	1	34.5	A2	v6	112435	0.3	112435	-0.0992
37	19	1	38.5	A1	v6	36	19	1	37.5	A2	v6	112433	0.2	112433	-0.1337
37	19	1	36.5	A1	v6	36	19	1	35.5	A2	v6	112427	0.3	112428	-0.2181
37	19	1	37.5	A1	v6	36	19	1	36.5	A2	v6	112427	0.2	112427	-0.1917
37	20	1	34.5	E+	v6	36	20	1	33.5	E+	v6	112444	0.3	112444	-0.2397
37	20	1	35.5	E+	v6	36	20	1	34.5	E+	v6	112429	0.2	112430	-0.3044
37	20	1	36.5	E+	v6	36	20	1	35.5	E+	v6	112421	0.3	112422	-0.1701
37	20	1	37.5	E+	v6	36	20	1	36.5	E+	v6	112421	0.2	112421	-0.2382
37	21	1	35.5	E+	v6	36	21	1	34.5	E+	v6	112424	0.2	112424	-0.2807
37	21	1	38.5	E+	v6	36	21	1	37.5	E+	v6	112422	0.2	112422	-0.1753
37	21	1	36.5	E+	v6	36	21	1	35.5	E+	v6	112415	0.2	112415	-0.2214
37	21	1	37.5	E+	v6	36	21	1	36.5	E+	v6	112414	0.2	112414	-0.1747
37	22	1	38.5	A1	v6	36	22	1	37.5	A2	v6	112416	0.3	112416	-0.064
37	22	1	35.5	A1	v6	36	22	1	34.5	A2	v6	112418	0.3	112418	-0.2385
37	22	1	36.5	A1	v6	36	22	1	35.5	A2	v6	112408	0.2	112409	-0.1743
37	22	1	37.5	A1	v6	36	22	1	36.5	A2	v6	112407	0.2	112408	-0.1865
37	22	1	34.5	A1	v6	36	22	1	33.5	A2	v6	112436	0.2	112436	-0.2045
37	22	1	39.5	A1	v6	36	22	1	38.5	A2	v6	112435	0.3	112435	-0.2874
37	23	1	39.5	E+	v6	36	23	1	38.5	E+	v6	112430	0.2	112431	-0.2936
37	23	1	35.5	E+	v6	36	23	1	34.5	E+	v6	112412	0.2	112413	-0.2119
37	23	1	38.5	E+	v6	36	23	1	37.5	E+	v6	112410	0.2	112410	-0.1051
37	24	1	37.5	E+	v6	36	24	1	36.5	E+	v6	112393	0.3	112393	-0.198
37	24	1	36.5	E+	v6	36	24	1	35.5	E+	v6	112394	0.3	112395	-0.2618
37	25	1	37.5	A1	v6	36	25	1	36.5	A2	v6	112385	0.2	112386	-0.1986
37	25	1	36.5	A1	v6	36	25	1	35.5	A2	v6	112387	0.2	112387	-0.256
37	25	1	35.5	A1	v6	36	25	1	34.5	A2	v6	112400	0.2	112400	-0.3059
37	25	1	38.5	A1	v6	36	25	1	37.5	A2	v6	112396	0.2	112397	-0.2593
37	25	1	34.5	A1	v6	36	25	1	33.5	A2	v6	112423	0.2	112423	-0.1298
37	25	1	39.5	A1	v6	36	25	1	38.5	A2	v6	112421	0.2	112421	-0.1486
37	26	1	34.5	E+	v6	36	26	1	33.5	E+	v6	112418	0.3	112418	0.0632
37	26	1	39.5	E+	v6	36	26	1	38.5	E+	v6	112416	0.3	112416	-0.1771
37	26	1	35.5	E+	v6	36	26	1	34.5	E+	v6	112393	0.3	112393	-0.2594
37	26	1	38.5	E+	v6	36	26	1	37.5	E+	v6	112389	0.3	112390	-0.1738
37	27	1	34.5	E+	v6	36	27	1	33.5	E+	v6	112413	0.2	112413	-0.1036
37	27	1	39.5	E+	v6	36	27	1	38.5	E+	v6	112411	0.2	112411	-0.0535
37	27	1	35.5	E+	v6	36	27	1	34.5	E+	v6	112386	0.2	112386	-0.1511
37	27	1	38.5	E+	v6	36	27	1	37.5	E+	v6	112382	0.3	112382	-0.0524
37	27	1	36.5	E+	v6	36	27	1	35.5	E+	v6	112371	0.2	112371	-0.1368
37	27	1	37.5	E+	v6	36	27	1	36.5	E+	v6	112369	0.2	112370	-0.1157
37	28	1	35.5	A1	v6	36	28	1	34.5	A2	v6	112379	0.2	112379	-0.0235
37	28	1	38.5	A1	v6	36	28	1	37.5	A2	v6	112375	0.2	112375	-0.029
37	28	1	36.5	A1	v6	36	28	1	35.5	A2	v6	112363	0.2	112363	0.0044
37	28	1	37.5	A1	v6	36	28	1	36.5	A2	v6	112361	0.2	112361	-0.0057
37	28	1	34.5	A1	v6	36	28	1	33.5	A2	v6	112408	0.2	112408	0.0431
37	28	1	39.5	A1	v6	36	28	1	38.5	A2	v6	112406	0.2	112406	0.0639
37	29	1	35.5	E+	v6	36	29	1	34.5	E+	v6	112372	0.2	112372	0.0427
37	29	1	38.5	E+	v6	36	29	1	37.5	E+	v6	112367	0.3	112367	0.0575
37	30	1	39.5	E+	v6	36	30	1	38.5	E+	v6	112394	0.3	112394	0.1061
37	30	1	35.5	E+	v6	36	30	1	34.5	E+	v6	112364	0.2	112364	0.1826
37	31	1	34.5	A1	v6	36	31	1	33.5	A2	v6	112392	0.2	112391	0.1951
37	31	1	39.5	A1	v6	36	31	1	38.5	A2	v6	112388	0.2	112388	0.2547
37	32	1	39.5	E+	v6	36	32	1	38.5	E+	v6	112382	0.3	112382	0.344
37	33	1	34.5	E+	v6	36	33	1	33.5	E+	v6	112380	0.2	112379	0.5355
37	33	1	39.5	E+	v6	36	33	1	38.5	E+	v6	112376	0.2	112375	0.6107
37	34	1	34.5	A1	v6	36	34	1	33.5	A2	v6	112374	0.2	112373	0.786
37	34	1	39.5	A1	v6	36	34	1	38.5	A2	v6	112369	0.3	112369	0.8438
37	35	1	34.5	E+	v6	36	35	1	33.5	E+	v6	112367	0.3	112366	0.9376
39	1	1	37.5	A1	v6	38	1	1	36.5	A2	v6	118683	0.35	118682	0.9831
39	1	1	38.5	A1	v6	38	1	1	37.5	A2	v6	118683	0.35	118682	0.746
39	1	1	36.5	A1	v6	38	1	1	35.5	A2	v6	118683	0.35	118682	0.7236
39	1	1	39.5	A1	v6	38	1	1	38.5	A2	v6	118684	0.35	118683	0.9128
39	1	1	41.5	A1	v6	38	1	1	40.5	A2	v6	118684	0.35	118683	0.7819
39	1	1	40.5	A1	v6	38	1	1	39.5	A2	v6	118684	0.35	118683	0.6106
39	2	1	40.5	E+	v6	38	2	1	39.5	E+	v6	118603	0.3	118603	0.4922
39	2	1	41.5	E+	v6	38	2	1	40.5	E+	v6	118603	0.3	118603	0.5686
39	2	1	36.5	E+	v6	38	2	1	35.5	E+	v6	118602	0.3	118602	0.3343
39	2	1	38.5	E+	v6	38	2	1	37.5	E+	v6	118602	0.3	118602	0.4922
39	2	1	37.5	E+	v6	38	2	1	36.5	E+	v6	118602	0.3	118602	0.6801
39	3	1	41.5	E+	v6	38	3	1	40.5	E+	v6	118584	0.3	118584	0.3395
39	3	1	40.5	E+	v6	38	3	1	39.5	E+	v6	118584	0.3	118584	0.4371
39	3	1	36.5	E+	v6	38	3	1	35.5	E+	v6	118584	0.3	118583	0.3455
39	3	1	39.5	E+	v6	38	3	1	38.5	E+	v6	118584	0.3	118583	0.3413
39	3	1	38.5	E+	v6	38	3	1	37.5	E+	v6	118583	0.3	118583	0.2707
39	3	1	37.5	E+	v6	38	3	1	36.5	E+	v6	118583	0.3	118583	0.368
39	10	1	41.5	A1	v6	38	10	1	40.5	A2	v6	118554	0.2	118554	0.0486
39	10	1	36.5	A1	v6	38	10	1	35.5	A2	v6	118554	0.3	118553	0.313
39	10	1	40.5	A1	v6	38	10	1	39.5	A2	v6	118551	0.2	118550	0.0951
39	10	1	37.5	A1	v6	38	10	1	36.5	A2	v6	118550	0.2	118550	0.0091
39	10	1	38.5	A1	v6	38	10	1	37.5	A2	v6	118549	0.2	118549	0.1709
39	10	1	39.5	A1	v6	38	10	1	38.5	A2	v6	118549	0.2	118549	0.0061
39	13	1	41.5	A1	v6	38	13	1	40.5	A2	v6	118544	0.2	118544	0.0157
39	13	1	36.5	A1	v6	38	13	1	35.5	A2	v6	118544	0.2	118544	0.082
39	13	1	40.5	A1	v6	38	13	1	39.5	A2	v6	118538	0.2	118538	0.0511
39	13	1	37.5	A1	v6	38	13	1	36.5	A2	v6	118538	0.2	118538	0.0253
39	13	1	38.5	A1	v6	38	13	1	37.5	A2	v6	118535	0.2	118535	0.029
39	13	1	39.5	A1	v6	38	13	1	38.5	A2	v6	118535	0.2	118535	0.0482
39	16	1	36.5	A1	v6	38	16	1	35.5	A2	v6	118533	0.3	118533	-0.1375
39	16	1	41.5	A1	v6	38	16	1	40.5	A2	v6	118533	0.3	118532	0.0521
39	16	1	37.5	A1	v6	38	16	1	36.5	A2	v6	118524	0.3	118524	-0.0177
39	16	1	40.5	A1	v6	38	16	1	39.5	A2	v6	118524	0.3	118524	-0.1193
39	16	1	38.5	A1	v6	38	16	1	37.5	A2	v6	118520	0.5	118520	-0.2516
39	16	1	39.5	A1	v6	38	16	1	38.5	A2	v6	118520	0.5	118520	-0.0033
39	15	1	36.5	E+	v6	38	15	1	35.5	E+	v6	118536	0.3	118536	-0.0865
39	15	1	41.5	E+	v6	38	15	1	40.5	E+	v6	118536	0.3	118536	0.011
39	12	1	40.5	E+	v6	38	12	1	39.5	E+	v6	118542	0.3	118542	-0.02
39	12	1	37.5	E+	v6	38	12	1	36.5	E+	v6	118542	0.3	118542	0.1016
46	3	1	48.5	E	v6	45	3	1	47.5	E	v6	139858	0.8	139858	0.3411
46	3	1	47.5	E	v6	45	3	1	46.5	E	v6	139858	0.8	139858	0.3734
46	3	1	46.5	E	v6	45	3	1	45.5	E	v6	139858	0.8	139858	0.6577
46	3	1	43.5	E	v6	45	3	1	42.5	E	v6	139858	0.8	139858	0.7189
46	3	1	45.5	E	v6	45	3	1	44.5	E	v6	139858	0.8	139858	0.9576
46	3	1	44.5	E	v6	45	3	1	43.5	E	v6	139858	0.8	139857	1.0488
46	4	1	47.5	A1	v6	45	4	1	46.5	A2	v6	139847	0.3	139846	0.4548
46	4	1	43.5	A1	v6	45	4	1	42.5	A2	v6	139847	0.3	139846	0.6444
46	4	1	44.5	A1	v6	45	4	1	43.5	A2	v6	139846	0.3	139845	0.4795
46	4	1	45.5	A1	v6	45	4	1	44.5	A2	v6	139846	0.3	139845	0.464
46	5	1	48.5	E	v6	45	5	1	47.5	E	v6	139839	0.3	139839	0.4438
46	5	1	43.5	E	v6	45	5	1	42.5	E	v6	139839	0.3	139838	0.4928
46	5	1	47.5	E	v6	45	5	1	46.5	E	v6	139839	0.3	139838	0.5028
46	5	1	44.5	E	v6	45	5	1	43.5	E	v6	139838	0.3	139838	0.4247
46	5	1	45.5	E	v6	45	5	1	44.5	E	v6	139838	0.3	139838	0.506
12	0	0	9.5	A1	v3	11	0	0	8.5	A2	v3	36531.1	0.05	36531	0.0675
12	0	0	12.5	A1	v3	11	0	0	11.5	A2	v3	36535.4	0.07	36535.3	0.0621
12	0	0	13.5	A1	v3	11	0	0	12.5	A2	v3	36538.8	0.05	36538.8	0.03
12	1	0	10.5	E	v3	11	1	0	9.5	E	v3	36528.5	0.07	36528.4	0.0531
12	1	0	12.5	E	v3	11	1	0	11.5	E	v3	36534.5	0.05	36534.5	0.054
12	1	0	14.5	E	v3	11	1	0	13.5	E	v3	36537.7	0.05	36537.7	0.0563
12	1	0	13.5	E	v3	11	1	0	12.5	E	v3	36538.3	0.05	36538.3	0.0399
12	2	0	11.5	E	v3	11	2	0	10.5	E	v3	36528.5	0.07	36528.5	0.0461
12	2	0	12.5	E	v3	11	2	0	11.5	E	v3	36532	0.05	36531.9	0.0643
12	3	0	11.5	A2	v3	11	3	0	10.5	A1	v3	36525.8	0.05	36525.7	0.0769
12	3	0	9.5	A2	v3	11	3	0	8.5	A1	v3	36540.9	0.05	36540.9	0.0168
12	3	0	14.5	A2	v3	11	3	0	13.5	A1	v3	36544	0.05	36543.9	0.0566
12	4	0	14.5	E	v3	11	4	0	13.5	E	v3	36549.4	0.05	36549.4	0.0728
12	5	0	12.5	E	v3	11	5	0	11.5	E	v3	36514.1	0.05	36514.1	0.0241
12	5	0	11.5	E	v3	11	5	0	10.5	E	v3	36516.9	0.05	36516.9	0.0854
12	5	0	14.5	E	v3	11	5	0	13.5	E	v3	36556.4	0.05	36556.4	0.0858
12	6	0	12.5	A1	v3	11	6	0	11.5	A2	v3	36504.8	0.05	36504.7	0.0548
12	6	0	11.5	A1	v3	11	6	0	10.5	A2	v3	36510.8	0.05	36510.7	0.0475
12	6	0	13.5	A1	v3	11	6	0	12.5	A2	v3	36520.8	0.05	36520.7	0.0531
12	6	0	14.5	A1	v3	11	6	0	13.5	A2	v3	36564.9	0.05	36564.8	0.0702
12	6	0	9.5	A1	v3	11	6	0	8.5	A2	v3	36571	0.05	36571	0.0197
12	7	0	13.5	E	v3	11	7	0	12.5	E	v3	36514.4	0.05	36514.4	0.0561
12	7	0	14.5	E	v3	11	7	0	13.5	E	v3	36574.8	0.05	36574.8	0.0434
12	7	0	9.5	E	v3	11	7	0	8.5	E	v3	36585.7	0.05	36585.6	0.0367
12	8	0	12.5	E	v3	11	8	0	11.5	E	v3	36481	0.05	36481	0.0242
12	8	0	11.5	E	v3	11	8	0	10.5	E	v3	36495	0.05	36495	0.0547
12	8	0	14.5	E	v3	11	8	0	13.5	E	v3	36586.2	0.05	36586.2	0.0318
12	8	0	9.5	E	v3	11	8	0	8.5	E	v3	36602.7	0.05	36602.7	0.0345
12	9	0	11.5	A2	v3	11	9	0	10.5	A1	v3	36485.2	0.05	36485.2	-0.0023
12	9	0	12.5	A2	v3	11	9	0	11.5	A1	v3	36466.6	0.05	36466.6	0.0299
12	9	0	13.5	A2	v3	11	9	0	12.5	A1	v3	36499.4	0.05	36499.3	0.0524
12	9	0	14.5	A2	v3	11	9	0	13.5	A1	v3	36599.1	0.05	36599	0.0449
12	9	0	9.5	A2	v3	11	9	0	8.5	A1	v3	36622.2	0.05	36622.2	0.0081
12	10	0	10.5	E	v3	11	10	0	9.5	E	v3	36544.4	0.05	36544.4	0.0141
12	11	0	12.5	E	v3	11	11	0	11.5	E	v3	36432.7	0.05	36432.7	-0.0063
12	11	0	10.5	E	v3	11	11	0	9.5	E	v3	36547.7	0.05	36547.7	-0.0054
37	2	0	39.5	E	v3	36	2	0	38.5	E	v3	112617	0.6	112617	-0.0019
37	0	0	37.5	A2	v3	36	0	0	36.5	A1	v3	112617	0.6	112617	0.0457
37	3	0	38.5	A1	v3	36	3	0	37.5	A2	v3	112617	0.6	112617	0.1883
37	1	0	37.5	E	v3	36	1	0	36.5	E	v3	112617	0.6	112617	0.1143
37	4	0	39.5	E	v3	36	4	0	38.5	E	v3	112617	0.6	112617	0.1348
37	3	0	39.5	A1	v3	36	3	0	38.5	A2	v3	112617	0.6	112617	0.0552
37	8	0	39.5	E	v3	36	8	0	38.5	E	v3	112616	0.6	112616	0.0188
37	3	0	37.5	A1	v3	36	3	0	36.5	A2	v3	112616	0.6	112616	0.0153
37	4	0	34.5	E	v3	36	4	0	33.5	E	v3	112616	0.6	112616	0.038
37	3	0	36.5	A1	v3	36	3	0	35.5	A2	v3	112616	0.4	112616	0.0997
37	4	0	37.5	E	v3	36	4	0	36.5	E	v3	112616	0.4	112616	0.1251
37	9	0	34.5	A1	v3	36	9	0	33.5	A2	v3	112616	0.4	112616	0.1573
37	6	0	35.5	A2	v3	36	6	0	34.5	A1	v3	112615	0.4	112615	0.1276
37	7	0	35.5	E	v3	36	7	0	34.5	E	v3	112614	0.5	112614	0.0495
37	8	0	38.5	E	v3	36	8	0	37.5	E	v3	112614	0.5	112614	0.0877
37	9	0	38.5	A1	v3	36	9	0	37.5	A2	v3	112613	0.3	112613	0.0648
37	9	0	35.5	A1	v3	36	9	0	34.5	A2	v3	112613	0.3	112613	-0.0115
37	8	0	37.5	E	v3	36	8	0	36.5	E	v3	112613	0.3	112613	0.0394
37	9	0	36.5	A1	v3	36	9	0	35.5	A2	v3	112611	0.3	112611	-0.0016
37	11	0	38.5	E	v3	36	11	0	37.5	E	v3	112611	0.3	112611	0.1092
37	10	0	36.5	E	v3	36	10	0	35.5	E	v3	112610	0.4	112610	0.0897
37	12	0	38.5	A2	v3	36	12	0	37.5	A1	v3	112610	0.4	112610	0.1315
37	12	0	35.5	A2	v3	36	12	0	34.5	A1	v3	112610	0.4	112610	0.1616
37	11	0	36.5	E	v3	36	11	0	35.5	E	v3	112609	0.5	112609	0.1455
37	13	0	38.5	E	v3	36	13	0	37.5	E	v3	112609	0.5	112609	0.0871
37	11	0	37.5	E	v3	36	11	0	36.5	E	v3	112609	0.5	112609	0.0647
37	13	0	35.5	E	v3	36	13	0	34.5	E	v3	112609	0.5	112609	-0.0645
37	12	0	36.5	A2	v3	36	12	0	35.5	A1	v3	112607	0.4	112607	0.1252
37	12	0	37.5	A2	v3	36	12	0	36.5	A1	v3	112607	0.4	112607	0.12
37	14	0	38.5	E	v3	36	14	0	37.5	E	v3	112607	0.4	112607	-0.065
37	15	0	35.5	A1	v3	36	15	0	34.5	A2	v3	112607	0.2	112607	0.0731
37	15	0	38.5	A1	v3	36	15	0	37.5	A2	v3	112606	0.3	112606	0.1148
37	13	0	37.5	E	v3	36	13	0	36.5	E	v3	112606	0.3	112606	-0.0022
37	16	0	38.5	E	v3	36	16	0	37.5	E	v3	112605	0.3	112604	0.129
37	14	0	36.5	E	v3	36	14	0	35.5	E	v3	112604	0.4	112604	-0.0187
37	14	0	37.5	E	v3	36	14	0	36.5	E	v3	112604	0.4	112604	0.1459
37	17	0	38.5	E	v3	36	17	0	37.5	E	v3	112603	0.3	112603	0.015
37	18	0	35.5	A2	v3	36	18	0	34.5	A1	v3	112602	0.3	112602	0.003
37	15	0	36.5	A1	v3	36	15	0	35.5	A2	v3	112602	0.3	112602	-0.1404
37	15	0	37.5	A1	v3	36	15	0	36.5	A2	v3	112602	0.3	112602	0.1183
37	18	0	38.5	A2	v3	36	18	0	37.5	A1	v3	112601	0.3	112601	-0.0455
37	17	0	36.5	E	v3	36	17	0	35.5	E	v3	112598	0.3	112598	0.1411
37	17	0	37.5	E	v3	36	17	0	36.5	E	v3	112598	0.4	112598	0.0905
37	21	0	35.5	A1	v3	36	21	0	34.5	A2	v3	112598	0.4	112598	-0.1071
37	18	0	36.5	A2	v3	36	18	0	35.5	A1	v3	112596	0.3	112596	0.0238
37	18	0	37.5	A2	v3	36	18	0	36.5	A1	v3	112595	0.3	112595	-0.0072
37	19	0	37.5	E	v3	36	19	0	36.5	E	v3	112593	0.3	112593	0.0308
37	24	0	35.5	A2	v3	36	24	0	34.5	A1	v3	112593	0.3	112593	-0.2192
37	23	0	38.5	E	v3	36	23	0	37.5	E	v3	112592	0.3	112592	-0.1603
37	20	0	36.5	E	v3	36	20	0	35.5	E	v3	112591	0.3	112591	-0.1236
37	24	0	38.5	A2	v3	36	24	0	37.5	A1	v3	112589	0.3	112590	-0.2541
37	21	0	36.5	A1	v3	36	21	0	35.5	A2	v3	112589	0.3	112589	-0.06
37	21	0	37.5	A1	v3	36	21	0	36.5	A2	v3	112588	0.3	112588	-0.0494
37	27	0	35.5	A1	v3	36	27	0	34.5	A2	v3	112587	0.3	112587	-0.4779
37	27	0	38.5	A1	v3	36	27	0	37.5	A2	v3	112583	0.3	112583	-0.3956
37	23	0	37.5	E	v3	36	23	0	36.5	E	v3	112582	0.3	112582	-0.1829
37	24	0	36.5	A2	v3	36	24	0	35.5	A1	v3	112581	0.3	112581	-0.2956
37	24	0	37.5	A2	v3	36	24	0	36.5	A1	v3	112579	0.3	112580	-0.2518
37	27	0	36.5	A1	v3	36	27	0	35.5	A2	v3	112572	0.3	112572	-0.437
37	27	0	37.5	A1	v3	36	27	0	36.5	A2	v3	112570	0.3	112571	-0.4577
41	0	0	43.5	A2	v3	40	0	0	42.5	A1	v3	124783	0.5	124783	0.0196
41	1	0	43.5	E	v3	40	1	0	42.5	E	v3	124783	0.5	124783	0.0437
41	2	0	42.5	E	v3	40	2	0	41.5	E	v3	124783	0.5	124783	0.0464
41	0	0	41.5	A2	v3	40	0	0	40.5	A1	v3	124783	0.5	124783	0.0932
41	4	0	41.5	E	v3	40	4	0	40.5	E	v3	124782	0.5	124782	0.1188
41	3	0	39.5	A1	v3	40	3	0	38.5	A2	v3	124782	0.5	124782	0.126
41	5	0	42.5	E	v3	40	5	0	41.5	E	v3	124782	0.5	124782	0.1353
41	7	0	43.5	E	v3	40	7	0	42.5	E	v3	124782	0.5	124782	0.1547
41	15	0	43.5	A1	v3	40	15	0	42.5	A2	v3	124778	0.4	124778	-0.038
41	10	0	42.5	E	v3	40	10	0	41.5	E	v3	124778	0.4	124778	-0.0419
41	15	0	38.5	A1	v3	40	15	0	37.5	A2	v3	124778	0.4	124778	-0.0694
41	12	0	40.5	A2	v3	40	12	0	39.5	A1	v3	124774	0.4	124774	0.1193
41	12	0	41.5	A2	v3	40	12	0	40.5	A1	v3	124774	0.4	124774	0.0436
41	15	0	42.5	A1	v3	40	15	0	41.5	A2	v3	124772	0.3	124772	0.1216
41	24	0	43.5	A2	v3	40	24	0	42.5	A1	v3	124771	0.3	124771	-0.1982
41	15	0	40.5	A1	v3	40	15	0	39.5	A2	v3	124769	0.4	124769	-0.0446
41	15	0	41.5	A1	v3	40	15	0	40.5	A2	v3	124769	0.4	124768	0.0557
41	18	0	39.5	A2	v3	40	18	0	38.5	A1	v3	124767	0.3	124767	0.0449
41	20	0	39.5	E	v3	40	20	0	38.5	E	v3	124764	0.3	124764	-0.0479
41	20	0	42.5	E	v3	40	20	0	41.5	E	v3	124763	0.3	124763	0.0587
41	18	0	41.5	A2	v3	40	18	0	40.5	A1	v3	124762	0.5	124762	-0.0067
41	21	0	39.5	A1	v3	40	21	0	38.5	A2	v3	124762	0.5	124762	0.0267
41	21	0	42.5	A1	v3	40	21	0	41.5	A2	v3	124761	0.4	124761	0.0002
41	19	0	40.5	E	v3	40	19	0	39.5	E	v3	124761	0.4	124760	0.0917
41	22	0	39.5	E	v3	40	22	0	38.5	E	v3	124761	0.4	124760	0.056
41	19	0	41.5	E	v3	40	19	0	40.5	E	v3	124760	0.3	124760	-0.0491
41	22	0	42.5	E	v3	40	22	0	41.5	E	v3	124759	0.3	124759	-0.0491
41	20	0	41.5	E	v3	40	20	0	40.5	E	v3	124758	0.3	124758	-0.0757
41	23	0	42.5	E	v3	40	23	0	41.5	E	v3	124757	0.3	124757	-0.0803
41	24	0	39.5	A2	v3	40	24	0	38.5	A1	v3	124756	0.3	124757	-0.2536
41	24	0	42.5	A2	v3	40	24	0	41.5	A1	v3	124755	0.3	124755	-0.225
41	22	0	40.5	E	v3	40	22	0	39.5	E	v3	124753	0.3	124753	-0.0906
41	27	0	39.5	A1	v3	40	27	0	38.5	A2	v3	124751	0.3	124751	-0.2307
41	24	0	40.5	A2	v3	40	24	0	39.5	A1	v3	124748	0.4	124748	-0.2573
41	27	0	42.5	A1	v3	40	27	0	41.5	A2	v3	124748	0.4	124748	-0.3284
41	29	0	39.5	E	v3	40	29	0	38.5	E	v3	124746	0.3	124747	-0.68
41	25	0	41.5	E	v3	40	25	0	40.5	E	v3	124744	0.3	124744	-0.2202
41	31	0	39.5	E	v3	40	31	0	38.5	E	v3	124742	0.4	124743	-0.9055
41	27	0	40.5	A1	v3	40	27	0	39.5	A2	v3	124739	0.3	124740	-0.4864
41	27	0	41.5	A1	v3	40	27	0	40.5	A2	v3	124738	0.3	124739	-0.4014
41	29	0	41.5	E	v3	40	29	0	40.5	E	v3	124732	0.3	124733	-0.6269
1	0	1	3.5	E	v6	0	0	1	2.5	E	v6	3157.5	0.05	3157.46	0.034789
1	0	1	1.5	E	v6	0	0	1	2.5	E	v6	3357.72	0.05	3357.77	-0.042051
2	0	1	2.5	E	v6	1	0	1	1.5	E	v6	5645.99	0.05	5645.99	-0.005502
2	0	1	3.5	E	v6	1	0	1	3.5	E	v6	5718.39	0.05	5718.39	0.003282
2	1	1	3.5	A1	v6	1	1	1	2.5	A2	v6	5794.7	0.05	5794.68	0.021705
2	1	-1	3.5	E	v6	1	1	-1	2.5	E	v6	5800.54	0.05	5800.53	0.006767
2	1	1	3.5	A2	v6	1	1	1	2.5	A1	v6	5806.11	0.05	5806.09	0.022881
2	1	1	2.5	A1	v6	1	1	1	2.5	A2	v6	5841.22	0.05	5841.21	0.008336
2	1	-1	2.5	E	v6	1	1	-1	2.5	E	v6	5846.79	0.05	5846.83	-0.038751
2	1	1	2.5	A2	v6	1	1	1	2.5	A1	v6	5852.16	0.05	5852.17	-0.007197
2	0	1	1.5	E	v6	1	0	1	1.5	E	v6	5936.49	0.05	5936.5	-0.007038
2	1	1	1.5	A1	v6	1	1	1	2.5	A2	v6	6010.88	0.05	6010.91	-0.03554
2	1	-1	1.5	E	v6	1	1	-1	2.5	E	v6	6015.88	0.05	6015.9	-0.027715
2	1	-1	3.5	E	v6	1	1	-1	3.5	E	v6	6032.86	0.05	6032.84	0.014674
2	0	1	4.5	E	v6	1	0	1	3.5	E	v6	6131.88	0.05	6131.84	0.043268
2	0	1	3.5	E	v6	1	0	1	2.5	E	v6	6166	0.05	6165.98	0.022717
2	0	1	0.5	E	v6	1	0	1	1.5	E	v6	6212.83	0.05	6212.82	0.010587
2	1	1	4.5	A1	v6	1	1	1	3.5	A2	v6	6215.9	0.05	6215.88	0.024788
2	1	-1	4.5	E	v6	1	1	-1	3.5	E	v6	6221.84	0.05	6221.79	0.05223
2	1	1	4.5	A2	v6	1	1	1	3.5	A1	v6	6227.41	0.05	6227.42	-0.004057
2	0	1	2.5	E	v6	1	0	1	2.5	E	v6	6293.83	0.05	6293.89	-0.057805
2	1	1	1.5	A1	v6	1	1	1	1.5	A2	v6	6343.89	0.05	6343.88	0.009936
2	1	-1	1.5	E	v6	1	1	-1	1.5	E	v6	6350.19	0.05	6350.21	-0.019393
2	1	1	1.5	A2	v6	1	1	1	1.5	A1	v6	6356.23	0.05	6356.26	-0.026371
2	1	1	0.5	A1	v6	1	1	1	1.5	A2	v6	6463.12	0.05	6463.13	-0.00911
2	1	-1	0.5	E	v6	1	1	-1	1.5	E	v6	6468.8	0.05	6468.85	-0.047017
2	1	1	0.5	A2	v6	1	1	1	1.5	A1	v6	6474.27	0.05	6474.29	-0.020783
40	1	1	37.5	A2	v6	40	1	1	37.5	A1	v6	4799.68	0.0018	4799.69	-0.0098
40	1	1	38.5	A2	v6	40	1	1	38.5	A1	v6	4801	0.0009	4801.01	-0.0094
40	1	1	39.5	A2	v6	40	1	1	39.5	A1	v6	4801.71	0.0015	4801.72	-0.0084
40	1	1	40.5	A2	v6	40	1	1	40.5	A1	v6	4801.77	0.0016	4801.78	-0.0108
40	1	1	41.5	A2	v6	40	1	1	41.5	A1	v6	4801.14	0.0008	4801.15	-0.0093
40	1	1	42.5	A2	v6	40	1	1	42.5	A1	v6	4799.75	0.0014	4799.75	-0.0082
41	1	1	38.5	A1	v6	41	1	1	38.5	A2	v6	5039.02	0.0014	5039.03	-0.0061
41	1	1	39.5	A1	v6	41	1	1	39.5	A2	v6	5040.34	0.0012	5040.34	-0.0068
41	1	1	40.5	A1	v6	41	1	1	40.5	A2	v6	5041.05	0.0012	5041.06	-0.0099
41	1	1	41.5	A1	v6	41	1	1	41.5	A2	v6	5041.11	0.0014	5041.12	-0.004
41	1	1	42.5	A1	v6	41	1	1	42.5	A2	v6	5040.48	0.0011	5040.48	-0.0038
41	1	1	43.5	A1	v6	41	1	1	43.5	A2	v6	5039.08	0.0012	5039.09	-0.0044
42	1	1	39.5	A2	v6	42	1	1	39.5	A1	v6	5284.13	0.0012	5284.13	-0.0031
42	1	1	40.5	A2	v6	42	1	1	40.5	A1	v6	5285.45	0.0009	5285.45	-0.0031
42	1	1	41.5	A2	v6	42	1	1	41.5	A1	v6	5286.16	0.0017	5286.16	-0.0026
42	1	1	42.5	A2	v6	42	1	1	42.5	A1	v6	5286.22	0.0012	5286.22	-0.0007
42	1	1	43.5	A2	v6	42	1	1	43.5	A1	v6	5285.58	0.001	5285.58	0.0001
42	1	1	44.5	A2	v6	42	1	1	44.5	A1	v6	5284.19	0.0011	5284.19	-0.0019
43	1	1	40.5	A1	v6	43	1	1	40.5	A2	v6	5535	0.0015	5535	0.0009
43	1	1	41.5	A1	v6	43	1	1	41.5	A2	v6	5536.32	0.0008	5536.32	0.0037
43	1	1	42.5	A1	v6	43	1	1	42.5	A2	v6	5537.03	0.0019	5537.03	0.0007
43	1	1	43.5	A1	v6	43	1	1	43.5	A2	v6	5537.09	0.0023	5537.09	0.0047
43	1	1	44.5	A1	v6	43	1	1	44.5	A2	v6	5536.45	0.0007	5536.45	0.004
43	1	1	45.5	A1	v6	43	1	1	45.5	A2	v6	5535.06	0.0012	5535.06	0.0011
44	1	1	41.5	A2	v6	44	1	1	41.5	A1	v6	5791.63	0.0053	5791.63	0.006
44	1	1	42.5	A2	v6	44	1	1	42.5	A1	v6	5792.95	0.0024	5792.95	0.0041
44	1	1	43.5	A2	v6	44	1	1	43.5	A1	v6	5793.66	0.0038	5793.66	0.0009
44	1	1	44.5	A2	v6	44	1	1	44.5	A1	v6	5793.73	0.0035	5793.71	0.0111
44	1	1	45.5	A2	v6	44	1	1	45.5	A1	v6	5793.08	0.0019	5793.07	0.0058
44	1	1	46.5	A2	v6	44	1	1	46.5	A1	v6	5791.69	0.0041	5791.68	0.0057
45	1	1	42.5	A1	v6	45	1	1	42.5	A2	v6	6054.02	0.0046	6054.01	0.0075
45	1	1	43.5	A1	v6	45	1	1	43.5	A2	v6	6055.34	0.002	6055.33	0.0078
45	1	1	44.5	A1	v6	45	1	1	44.5	A2	v6	6056.04	0.0032	6056.04	0.0069
45	1	1	45.5	A1	v6	45	1	1	45.5	A2	v6	6056.1	0.0035	6056.09	0.0083
45	1	1	46.5	A1	v6	45	1	1	46.5	A2	v6	6055.46	0.0016	6055.45	0.0086
45	1	1	47.5	A1	v6	45	1	1	47.5	A2	v6	6054.07	0.0041	6054.06	0.0054
46	1	1	43.5	A2	v6	46	1	1	43.5	A1	v6	6322.15	0.0021	6322.14	0.0131
46	1	1	44.5	A2	v6	46	1	1	44.5	A1	v6	6323.47	0.001	6323.46	0.0094
46	1	1	45.5	A2	v6	46	1	1	45.5	A1	v6	6324.17	0.0014	6324.17	0.0044
46	1	1	46.5	A2	v6	46	1	1	46.5	A1	v6	6324.23	0.0016	6324.22	0.0122
46	1	1	47.5	A2	v6	46	1	1	47.5	A1	v6	6323.58	0.0009	6323.58	0.0063
46	1	1	48.5	A2	v6	46	1	1	48.5	A1	v6	6322.2	0.002	6322.19	0.004
47	1	1	44.5	A1	v6	47	1	1	44.5	A2	v6	6596.02	0.0018	6596.01	0.0096
47	1	1	45.5	A1	v6	47	1	1	45.5	A2	v6	6597.34	0.001	6597.33	0.0099
47	1	1	46.5	A1	v6	47	1	1	46.5	A2	v6	6598.05	0.0017	6598.04	0.008
47	1	1	47.5	A1	v6	47	1	1	47.5	A2	v6	6598.1	0.0019	6598.09	0.006
47	1	1	48.5	A1	v6	47	1	1	48.5	A2	v6	6597.46	0.0008	6597.45	0.0115
47	1	1	49.5	A1	v6	47	1	1	49.5	A2	v6	6596.07	0.0018	6596.06	0.0067
48	1	1	45.5	A2	v6	48	1	1	45.5	A1	v6	6875.63	0.0018	6875.62	0.0048
48	1	1	46.5	A2	v6	48	1	1	46.5	A1	v6	6876.95	0.0011	6876.94	0.0057
48	1	1	47.5	A2	v6	48	1	1	47.5	A1	v6	6877.66	0.0021	6877.65	0.0071
48	1	1	48.5	A2	v6	48	1	1	48.5	A1	v6	6877.71	0.0024	6877.7	0.0075
48	1	1	49.5	A2	v6	48	1	1	49.5	A1	v6	6877.07	0.001	6877.06	0.0091
48	1	1	50.5	A2	v6	48	1	1	50.5	A1	v6	6875.68	0.0016	6875.67	0.0075
49	1	1	46.5	A1	v6	49	1	1	46.5	A2	v6	7160.97	0.0018	7160.97	0.0036
49	1	1	47.5	A1	v6	49	1	1	47.5	A2	v6	7162.29	0.0009	7162.29	0.0044
49	1	1	48.5	A1	v6	49	1	1	48.5	A2	v6	7163	0.002	7162.99	0.0038
49	1	1	49.5	A1	v6	49	1	1	49.5	A2	v6	7163.04	0.002	7163.04	0.0004
49	1	1	50.5	A1	v6	49	1	1	50.5	A2	v6	7162.4	0.0008	7162.4	0.0045
49	1	1	51.5	A1	v6	49	1	1	51.5	A2	v6	7161.01	0.0017	7161.01	0.0009
50	1	1	47.5	A2	v6	50	1	1	47.5	A1	v6	7452.04	0.0023	7452.04	0.0008
50	1	1	48.5	A2	v6	50	1	1	48.5	A1	v6	7453.35	0.001	7453.36	-0.0043
50	1	1	49.5	A2	v6	50	1	1	49.5	A1	v6	7454.06	0.0016	7454.06	-0.007
50	1	1	50.5	A2	v6	50	1	1	50.5	A1	v6	7454.11	0.0019	7454.11	-0.0006
50	1	1	51.5	A2	v6	50	1	1	51.5	A1	v6	7453.46	0.0008	7453.47	-0.0036
50	1	1	52.5	A2	v6	50	1	1	52.5	A1	v6	7452.08	0.0021	7452.08	-0.0037
51	1	1	48.5	A1	v6	51	1	1	48.5	A2	v6	7748.82	0.002	7748.83	-0.0104
51	1	1	49.5	A1	v6	51	1	1	49.5	A2	v6	7750.14	0.0009	7750.15	-0.0113
51	1	1	50.5	A1	v6	51	1	1	50.5	A2	v6	7750.84	0.0014	7750.85	-0.0145
51	1	1	51.5	A1	v6	51	1	1	51.5	A2	v6	7750.9	0.0014	7750.9	-0.0054
51	1	1	52.5	A1	v6	51	1	1	52.5	A2	v6	7750.24	0.0008	7750.25	-0.0114
51	1	1	53.5	A1	v6	51	1	1	53.5	A2	v6	7748.86	0.002	7748.87	-0.0123
5	0	0	7.5	A2	v3	6	0	0	8.5	A1	v0	8.56465e+06	14.99	8.56466e+06	-10.8513
6	0	0	8.5	A1	v3	7	0	0	9.5	A2	v0	8.5616e+06	14.99	8.5616e+06	-5.1922
7	0	0	9.5	A2	v3	6	0	0	8.5	A1	v0	8.60423e+06	14.99	8.60426e+06	-27.3468
7	0	0	9.5	A2	v3	8	0	0	10.5	A1	v0	8.55855e+06	14.99	8.55855e+06	1.2318
8	0	0	10.5	A1	v3	7	0	0	9.5	A2	v0	8.60726e+06	14.99	8.60728e+06	-23.0046
8	0	0	10.5	A1	v3	9	0	0	11.5	A2	v0	8.55548e+06	14.99	8.55548e+06	-5.9231
9	0	0	11.5	A2	v3	10	0	0	12.5	A1	v0	8.55242e+06	14.99	8.55242e+06	-5.8157
9	0	0	11.5	A2	v3	8	0	0	10.5	A1	v0	8.61029e+06	14.99	8.61031e+06	-20.3914
10	0	0	12.5	A1	v3	11	0	0	13.5	A2	v0	8.54935e+06	14.99	8.54936e+06	-6.9268
10	0	0	12.5	A1	v3	9	0	0	11.5	A2	v0	8.61332e+06	14.99	8.61334e+06	-17.2628
11	0	0	13.5	A2	v3	12	0	0	14.5	A1	v0	8.54628e+06	14.99	8.54629e+06	-7.5135
11	0	0	13.5	A2	v3	10	0	0	12.5	A1	v0	8.61635e+06	14.99	8.61636e+06	-14.7285
12	0	0	14.5	A1	v3	11	0	0	13.5	A2	v0	8.61938e+06	14.99	8.61939e+06	-9.1324
12	0	0	14.5	A1	v3	13	0	0	15.5	A2	v0	8.54321e+06	14.99	8.54322e+06	-6.7131
13	0	0	15.5	A2	v3	12	0	0	14.5	A1	v0	8.6224e+06	14.99	8.62241e+06	-10.0275
13	0	0	15.5	A2	v3	14	0	0	16.5	A1	v0	8.54014e+06	14.99	8.54015e+06	-6.0503
14	0	0	16.5	A1	v3	15	0	0	17.5	A2	v0	8.53707e+06	14.99	8.53708e+06	-2.8453
14	0	0	16.5	A1	v3	13	0	0	15.5	A2	v0	8.62542e+06	14.99	8.62543e+06	-6.2927
15	0	0	17.5	A2	v3	16	0	0	18.5	A1	v0	8.534e+06	14.99	8.534e+06	-0.7091
15	0	0	17.5	A2	v3	14	0	0	16.5	A1	v0	8.62844e+06	14.99	8.62844e+06	-5.6999
16	0	0	18.5	A1	v3	17	0	0	19.5	A2	v0	8.53092e+06	14.99	8.53092e+06	-1.1509
16	0	0	18.5	A1	v3	15	0	0	17.5	A2	v0	8.63145e+06	14.99	8.63146e+06	-3.7348
17	0	0	19.5	A2	v3	18	0	0	20.5	A1	v0	8.52784e+06	14.99	8.52784e+06	-3.2792
17	0	0	19.5	A2	v3	16	0	0	18.5	A1	v0	8.63446e+06	14.99	8.63447e+06	-5.7787
17	15	0	19.5	A1	v3	16	15	0	18.5	A2	v0	8.63461e+06	14.99	8.63465e+06	-42.9258
18	0	0	20.5	A1	v3	19	0	0	21.5	A2	v0	8.52477e+06	14.99	8.52476e+06	6.3907
18	0	0	20.5	A1	v3	17	0	0	19.5	A2	v0	8.63748e+06	14.99	8.63748e+06	-0.4269
19	0	0	21.5	A2	v3	20	0	0	22.5	A1	v0	8.52168e+06	14.99	8.52168e+06	-0.6268
19	0	0	21.5	A2	v3	18	0	0	20.5	A1	v0	8.64049e+06	14.99	8.64049e+06	-0.5591
19	12	0	21.5	A2	v3	20	12	0	22.5	A1	v0	8.52178e+06	14.99	8.52175e+06	33.7107
20	0	0	22.5	A1	v3	21	0	0	23.5	A2	v0	8.5186e+06	14.99	8.5186e+06	-0.9517
20	0	0	22.5	A1	v3	19	0	0	21.5	A2	v0	8.64349e+06	14.99	8.6435e+06	-2.2676
21	0	0	23.5	A2	v3	20	0	0	22.5	A1	v0	8.6465e+06	14.99	8.6465e+06	2.8515
21	0	0	23.5	A2	v3	22	0	0	24.5	A1	v0	8.51551e+06	14.99	8.51551e+06	-0.2831
21	12	0	23.5	A2	v3	22	12	0	24.5	A1	v0	8.51561e+06	14.99	8.51559e+06	18.2872
21	15	0	23.5	A1	v3	22	15	0	24.5	A2	v0	8.51565e+06	14.99	8.51563e+06	25.9507
22	0	0	24.5	A1	v3	23	0	0	25.5	A2	v0	8.51243e+06	14.99	8.51242e+06	4.6737
22	0	0	24.5	A1	v3	21	0	0	23.5	A2	v0	8.6495e+06	14.99	8.6495e+06	-1.0815
22	12	0	24.5	A1	v3	23	12	0	25.5	A2	v0	8.51254e+06	14.99	8.51251e+06	28.809
23	0	0	25.5	A2	v3	22	0	0	24.5	A1	v0	8.6525e+06	14.99	8.6525e+06	-1.7663
23	0	0	25.5	A2	v3	24	0	0	26.5	A1	v0	8.50933e+06	14.99	8.50933e+06	-0.4731
23	15	0	25.5	A1	v3	22	15	0	24.5	A2	v0	8.65265e+06	14.99	8.65267e+06	-15.755
23	21	0	25.5	A1	v3	24	21	0	26.5	A2	v0	8.50963e+06	14.99	8.50956e+06	76.6448
24	0	0	26.5	A1	v3	25	0	0	27.5	A2	v0	8.50624e+06	14.99	8.50624e+06	0.4633
24	0	0	26.5	A1	v3	23	0	0	25.5	A2	v0	8.6555e+06	14.99	8.6555e+06	-3.3912
24	12	0	26.5	A1	v3	25	12	0	27.5	A2	v0	8.50633e+06	14.99	8.50634e+06	-3.7767
24	15	0	26.5	A2	v3	23	15	0	25.5	A1	v0	8.65566e+06	14.99	8.65567e+06	-8.5035
24	15	0	26.5	A2	v3	25	15	0	27.5	A1	v0	8.50641e+06	14.99	8.50638e+06	28.0588
24	18	0	26.5	A1	v3	25	18	0	27.5	A2	v0	8.50645e+06	14.99	8.50643e+06	21.8724
25	0	0	27.5	A2	v3	26	0	0	28.5	A1	v0	8.50315e+06	14.99	8.50315e+06	0.8861
25	0	0	27.5	A2	v3	24	0	0	26.5	A1	v0	8.6585e+06	14.99	8.6585e+06	-2.0503
25	12	0	27.5	A2	v3	26	12	0	28.5	A1	v0	8.50324e+06	14.99	8.50325e+06	-3.5401
25	15	0	27.5	A1	v3	24	15	0	26.5	A2	v0	8.65867e+06	14.99	8.65867e+06	-0.1505
25	15	0	27.5	A1	v3	26	15	0	28.5	A2	v0	8.50332e+06	14.99	8.5033e+06	27.8251
25	18	0	27.5	A2	v3	24	18	0	26.5	A1	v0	8.65872e+06	14.99	8.65873e+06	-9.6705
25	21	0	27.5	A1	v3	26	21	0	28.5	A2	v0	8.50345e+06	14.99	8.5034e+06	46.7553
26	0	0	28.5	A1	v3	27	0	0	29.5	A2	v0	8.50005e+06	14.99	8.50005e+06	-1.604
26	0	0	28.5	A1	v3	25	0	0	27.5	A2	v0	8.6615e+06	14.99	8.66149e+06	4.6634
26	12	0	28.5	A1	v3	27	12	0	29.5	A2	v0	8.50016e+06	14.99	8.50016e+06	2.2578
26	15	0	28.5	A2	v3	25	15	0	27.5	A1	v0	8.66167e+06	14.99	8.66167e+06	4.2994
26	18	0	28.5	A1	v3	25	18	0	27.5	A2	v0	8.66171e+06	14.99	8.66173e+06	-16.1066
27	0	0	29.5	A2	v3	26	0	0	28.5	A1	v0	8.66449e+06	14.99	8.66449e+06	3.2675
27	0	0	29.5	A2	v3	28	0	0	30.5	A1	v0	8.49695e+06	14.99	8.49695e+06	2.2859
27	12	0	29.5	A2	v3	28	12	0	30.5	A1	v0	8.49707e+06	14.99	8.49706e+06	1.8902
27	15	0	29.5	A1	v3	26	15	0	28.5	A2	v0	8.66467e+06	14.99	8.66466e+06	5.8205
27	15	0	29.5	A1	v3	28	15	0	30.5	A2	v0	8.49713e+06	14.99	8.49712e+06	12.9284
27	21	0	29.5	A1	v3	28	21	0	30.5	A2	v0	8.49728e+06	14.99	8.49724e+06	46.5302
28	0	0	30.5	A1	v3	27	0	0	29.5	A2	v0	8.66748e+06	14.99	8.66748e+06	3.0644
28	0	0	30.5	A1	v3	29	0	0	31.5	A2	v0	8.49385e+06	14.99	8.49385e+06	-2.1349
28	15	0	30.5	A2	v3	29	15	0	31.5	A1	v0	8.49404e+06	14.99	8.49403e+06	9.5612
28	21	0	30.5	A2	v3	27	21	0	29.5	A1	v0	8.66778e+06	14.99	8.66779e+06	-8.3683
28	21	0	30.5	A2	v3	29	21	0	31.5	A1	v0	8.49418e+06	14.99	8.49415e+06	28.7834
28	24	0	30.5	A1	v3	27	24	0	29.5	A2	v0	8.66784e+06	14.99	8.66785e+06	-9.799
28	24	0	30.5	A1	v3	29	24	0	31.5	A2	v0	8.49426e+06	14.99	8.49421e+06	44.2693
29	0	0	31.5	A2	v3	28	0	0	30.5	A1	v0	8.67046e+06	14.99	8.67047e+06	-2.8326
29	0	0	31.5	A2	v3	30	0	0	32.5	A1	v0	8.49075e+06	14.99	8.49075e+06	-4.9734
29	9	0	31.5	A1	v3	30	9	0	32.5	A2	v0	8.49081e+06	14.99	8.49082e+06	-7.041
29	12	0	31.5	A2	v3	28	12	0	30.5	A1	v0	8.67056e+06	14.99	8.67059e+06	-21.9285
29	12	0	31.5	A2	v3	30	12	0	32.5	A1	v0	8.49085e+06	14.99	8.49087e+06	-20.146
29	21	0	31.5	A1	v3	30	21	0	32.5	A2	v0	8.49111e+06	14.99	8.49107e+06	40.4593
29	24	0	31.5	A2	v3	30	24	0	32.5	A1	v0	8.49119e+06	14.99	8.49113e+06	59.7885
30	0	0	32.5	A1	v3	29	0	0	31.5	A2	v0	8.67346e+06	14.99	8.67345e+06	3.8722
30	0	0	32.5	A1	v3	31	0	0	33.5	A2	v0	8.48765e+06	14.99	8.48765e+06	3.3635
30	9	0	32.5	A2	v3	31	9	0	33.5	A1	v0	8.48772e+06	14.99	8.48772e+06	-0.2168
30	12	0	32.5	A1	v3	31	12	0	33.5	A2	v0	8.48777e+06	14.99	8.48777e+06	-4.3812
30	21	0	32.5	A2	v3	29	21	0	31.5	A1	v0	8.6738e+06	59.958	8.67378e+06	18.2886
30	21	0	32.5	A2	v3	31	21	0	33.5	A1	v0	8.48801e+06	14.99	8.48798e+06	33.2378
30	24	0	32.5	A1	v3	29	24	0	31.5	A2	v0	8.6738e+06	59.958	8.67384e+06	-47.5222
30	24	0	32.5	A1	v3	31	24	0	33.5	A2	v0	8.48808e+06	14.99	8.48805e+06	28.7837
31	0	0	33.5	A2	v3	32	0	0	34.5	A1	v0	8.48454e+06	14.99	8.48454e+06	-3.2059
31	0	0	33.5	A2	v3	30	0	0	32.5	A1	v0	8.67644e+06	14.99	8.67644e+06	2.2022
31	12	0	33.5	A2	v3	30	12	0	32.5	A1	v0	8.67654e+06	14.99	8.67656e+06	-18.36
31	12	0	33.5	A2	v3	32	12	0	34.5	A1	v0	8.48467e+06	14.99	8.48467e+06	-2.0603
31	15	0	33.5	A1	v3	30	15	0	32.5	A2	v0	8.67661e+06	14.99	8.67663e+06	-19.2821
31	15	0	33.5	A1	v3	32	15	0	34.5	A2	v0	8.48475e+06	14.99	8.48474e+06	10.5873
31	18	0	33.5	A2	v3	30	18	0	32.5	A1	v0	8.67668e+06	14.99	8.6767e+06	-18.2977
31	21	0	33.5	A1	v3	32	21	0	34.5	A2	v0	8.48492e+06	14.99	8.48489e+06	32.8576
31	24	0	33.5	A2	v3	32	24	0	34.5	A1	v0	8.48501e+06	14.99	8.48496e+06	49.8306
32	0	0	34.5	A1	v3	33	0	0	35.5	A2	v0	8.48144e+06	14.99	8.48144e+06	2.0002
32	0	0	34.5	A1	v3	31	0	0	33.5	A2	v0	8.67942e+06	14.99	8.67942e+06	4.4577
32	12	0	34.5	A1	v3	31	12	0	33.5	A2	v0	8.67953e+06	14.99	8.67955e+06	-15.662
32	12	0	34.5	A1	v3	33	12	0	35.5	A2	v0	8.48157e+06	14.99	8.48157e+06	-2.7024
32	18	0	34.5	A1	v3	31	18	0	33.5	A2	v0	8.67967e+06	14.99	8.67969e+06	-21.3668
32	21	0	34.5	A2	v3	31	21	0	33.5	A1	v0	8.67977e+06	14.99	8.67976e+06	7.1115
32	24	0	34.5	A1	v3	31	24	0	33.5	A2	v0	8.67984e+06	14.99	8.67984e+06	5.2226
33	0	0	35.5	A2	v3	34	0	0	36.5	A1	v0	8.47833e+06	59.958	8.47833e+06	2.4935
33	0	0	35.5	A2	v3	32	0	0	34.5	A1	v0	8.6824e+06	14.99	8.6824e+06	-1.9438
33	9	0	35.5	A1	v3	32	9	0	34.5	A2	v0	8.68246e+06	14.99	8.68247e+06	-11.0762
33	12	0	35.5	A2	v3	32	12	0	34.5	A1	v0	8.68251e+06	14.99	8.68253e+06	-17.6214
33	15	0	35.5	A1	v3	32	15	0	34.5	A2	v0	8.68258e+06	14.99	8.6826e+06	-23.3043
33	21	0	35.5	A1	v3	32	21	0	34.5	A2	v0	8.68273e+06	14.99	8.68275e+06	-23.8111
33	24	0	35.5	A2	v3	32	24	0	34.5	A1	v0	8.68279e+06	14.99	8.68283e+06	-37.0673
34	0	0	36.5	A1	v3	33	0	0	35.5	A2	v0	8.68537e+06	14.99	8.68538e+06	-1.1045
34	0	0	36.5	A1	v3	35	0	0	37.5	A2	v0	8.47522e+06	59.958	8.47522e+06	3.3712
34	9	0	36.5	A2	v3	33	9	0	35.5	A1	v0	8.68543e+06	14.99	8.68545e+06	-22.9918
34	9	0	36.5	A2	v3	35	9	0	37.5	A1	v0	8.4753e+06	14.99	8.4753e+06	-3.2213
34	12	0	36.5	A1	v3	33	12	0	35.5	A2	v0	8.6855e+06	14.99	8.68551e+06	-8.929
34	15	0	36.5	A2	v3	33	15	0	35.5	A1	v0	8.68557e+06	14.99	8.68558e+06	-10.7108
34	24	0	36.5	A1	v3	33	24	0	35.5	A2	v0	8.6858e+06	14.99	8.68582e+06	-27.6288
35	0	0	37.5	A2	v3	34	0	0	36.5	A1	v0	8.68835e+06	14.99	8.68835e+06	2.1883
35	0	0	37.5	A2	v3	36	0	0	38.5	A1	v0	8.4721e+06	14.99	8.4721e+06	-5.2592
35	6	0	37.5	A2	v3	36	6	0	38.5	A1	v0	8.47213e+06	14.99	8.47214e+06	-12.48
35	9	0	37.5	A1	v3	34	9	0	36.5	A2	v0	8.6884e+06	14.99	8.68843e+06	-28.3562
35	12	0	37.5	A2	v3	36	12	0	38.5	A1	v0	8.47226e+06	14.99	8.47225e+06	3.8875
35	12	0	37.5	A2	v3	34	12	0	36.5	A1	v0	8.68848e+06	14.99	8.68849e+06	-12.9504
35	15	0	37.5	A1	v3	34	15	0	36.5	A2	v0	8.68853e+06	14.99	8.68856e+06	-37.6149
35	24	0	37.5	A2	v3	34	24	0	36.5	A1	v0	8.68879e+06	14.99	8.68882e+06	-29.3735
35	27	0	37.5	A1	v3	34	27	0	36.5	A2	v0	8.68886e+06	14.99	8.68889e+06	-34.3716
36	0	0	38.5	A1	v3	37	0	0	39.5	A2	v0	8.46899e+06	14.99	8.46899e+06	-1.5118
36	0	0	38.5	A1	v3	35	0	0	37.5	A2	v0	8.69132e+06	14.99	8.69132e+06	-1.9497
36	9	0	38.5	A2	v3	37	9	0	39.5	A1	v0	8.46907e+06	14.99	8.46908e+06	-5.1901
36	9	0	38.5	A2	v3	35	9	0	37.5	A1	v0	8.69139e+06	14.99	8.69141e+06	-16.3634
36	12	0	38.5	A1	v3	37	12	0	39.5	A2	v0	8.46913e+06	14.99	8.46914e+06	-11.0842
36	12	0	38.5	A1	v3	35	12	0	37.5	A2	v0	8.69146e+06	14.99	8.69147e+06	-5.6855
36	15	0	38.5	A2	v3	35	15	0	37.5	A1	v0	8.69152e+06	14.99	8.69154e+06	-23.0516
36	18	0	38.5	A1	v3	35	18	0	37.5	A2	v0	8.69162e+06	14.99	8.69163e+06	-8.3981
36	22	0	38.5	E	v3	37	22	0	39.5	E	v0	8.46948e+06	14.99	8.46945e+06	30.6761
37	0	0	39.5	A2	v3	38	0	0	40.5	A1	v0	8.46587e+06	14.99	8.46587e+06	0.2243
37	0	0	39.5	A2	v3	36	0	0	38.5	A1	v0	8.69429e+06	14.99	8.69429e+06	-0.3181
37	9	0	39.5	A1	v3	36	9	0	38.5	A2	v0	8.69437e+06	14.99	8.69438e+06	-13.6819
37	9	0	39.5	A1	v3	38	9	0	40.5	A2	v0	8.46595e+06	14.99	8.46596e+06	-15.1067
37	12	0	39.5	A2	v3	38	12	0	40.5	A1	v0	8.46603e+06	14.99	8.46603e+06	-2.6694
37	12	0	39.5	A2	v3	36	12	0	38.5	A1	v0	8.69443e+06	14.99	8.69444e+06	-11.4014
37	15	0	39.5	A1	v3	38	15	0	40.5	A2	v0	8.46612e+06	14.99	8.46612e+06	7.9731
37	15	0	39.5	A1	v3	36	15	0	38.5	A2	v0	8.69451e+06	14.99	8.69452e+06	-11.0707
37	21	0	39.5	A1	v3	36	21	0	38.5	A2	v0	8.6947e+06	14.99	8.6947e+06	-5.0907
37	21	0	39.5	A1	v3	38	21	0	40.5	A2	v0	8.46634e+06	14.99	8.46632e+06	17.0335
37	21	0	39.5	A1	v3	37	21	0	39.5	A2	v0	8.58205e+06	14.99	8.58203e+06	15.3121
37	21	0	39.5	A2	v3	38	21	0	40.5	A1	v0	8.46634e+06	14.99	8.46632e+06	17.0335
37	21	0	39.5	A2	v3	37	21	0	39.5	A1	v0	8.58205e+06	14.99	8.58203e+06	15.3121
37	24	0	39.5	A2	v3	36	24	0	38.5	A1	v0	8.69477e+06	14.99	8.6948e+06	-23.3875
38	0	0	40.5	A1	v3	37	0	0	39.5	A2	v0	8.69727e+06	59.958	8.69726e+06	2.8951
38	0	0	40.5	A1	v3	39	0	0	41.5	A2	v0	8.46275e+06	14.99	8.46275e+06	-2.148
38	6	0	40.5	A1	v3	37	6	0	39.5	A2	v0	8.6973e+06	59.958	8.6973e+06	-6.472
38	9	0	40.5	A2	v3	37	9	0	39.5	A1	v0	8.69734e+06	14.99	8.69735e+06	-10.1061
38	12	0	40.5	A1	v3	39	12	0	41.5	A2	v0	8.46292e+06	14.99	8.46292e+06	-0.8503
38	12	0	40.5	A1	v3	37	12	0	39.5	A2	v0	8.69738e+06	14.99	8.69742e+06	-36.9785
38	12	0	40.5	A1	v3	37	12	0	39.5	A2	v0	8.6974e+06	14.99	8.69742e+06	-12.9951
38	15	0	40.5	A2	v3	39	15	0	41.5	A1	v0	8.46301e+06	14.99	8.46301e+06	6.6414
38	15	0	40.5	A2	v3	37	15	0	39.5	A1	v0	8.69749e+06	14.99	8.6975e+06	-9.1488
38	18	0	40.5	A1	v3	37	18	0	39.5	A2	v0	8.69758e+06	14.99	8.69759e+06	-9.0755
38	27	0	40.5	A2	v3	37	27	0	39.5	A1	v0	8.69785e+06	14.99	8.69788e+06	-30.6838
39	0	0	41.5	A2	v3	40	0	0	42.5	A1	v0	8.45963e+06	14.99	8.45963e+06	1.5653
39	0	0	41.5	A2	v3	38	0	0	40.5	A1	v0	8.70024e+06	14.99	8.70023e+06	7.1001
39	9	0	41.5	A1	v3	38	9	0	40.5	A2	v0	8.70031e+06	14.99	8.70032e+06	-7.1229
39	12	0	41.5	A2	v3	40	12	0	42.5	A1	v0	8.4598e+06	14.99	8.4598e+06	-3.2304
39	12	0	41.5	A2	v3	38	12	0	40.5	A1	v0	8.70038e+06	14.99	8.70039e+06	-10.452
39	15	0	41.5	A1	v3	40	15	0	42.5	A2	v0	8.4599e+06	14.99	8.4599e+06	3.4544
39	21	0	41.5	A1	v3	40	21	0	42.5	A2	v0	8.46012e+06	14.99	8.46011e+06	6.9825
39	21	0	41.5	A1	v3	38	21	0	40.5	A2	v0	8.70065e+06	14.99	8.70067e+06	-19.9395
39	21	0	41.5	A2	v3	38	21	0	40.5	A1	v0	8.70065e+06	14.99	8.70067e+06	-19.9395
39	21	0	41.5	A2	v3	40	21	0	42.5	A1	v0	8.46012e+06	14.99	8.46011e+06	6.9825
39	24	0	41.5	A2	v3	40	24	0	42.5	A1	v0	8.46026e+06	14.99	8.46023e+06	23.2578
39	27	0	41.5	A1	v3	38	27	0	40.5	A2	v0	8.70086e+06	14.99	8.70087e+06	-10.8023
39	30	0	41.5	A2	v3	40	30	0	42.5	A1	v0	8.4605e+06	14.99	8.46045e+06	49.0048
39	30	0	41.5	A2	v3	38	30	0	40.5	A1	v0	8.70093e+06	14.99	8.70095e+06	-20.2741
40	0	0	42.5	A1	v3	41	0	0	43.5	A2	v0	8.45652e+06	59.958	8.45651e+06	4.7705
40	0	0	42.5	A1	v3	39	0	0	41.5	A2	v0	8.7032e+06	14.99	8.7032e+06	2.1134
40	6	0	42.5	A1	v3	41	6	0	43.5	A2	v0	8.45655e+06	59.958	8.45656e+06	-9.3914
40	9	0	42.5	A2	v3	41	9	0	43.5	A1	v0	8.4566e+06	14.99	8.45661e+06	-8.6471
40	9	0	42.5	A2	v3	39	9	0	41.5	A1	v0	8.70328e+06	14.99	8.70329e+06	-10.1164
40	12	0	42.5	A1	v3	41	12	0	43.5	A2	v0	8.45669e+06	14.99	8.45669e+06	-1.1173
40	12	0	42.5	A1	v3	39	12	0	41.5	A2	v0	8.70334e+06	14.99	8.70336e+06	-16.949
40	15	0	42.5	A2	v3	39	15	0	41.5	A1	v0	8.70343e+06	14.99	8.70344e+06	-6.9335
40	15	0	42.5	A2	v3	41	15	0	43.5	A1	v0	8.45679e+06	14.99	8.45678e+06	5.0043
40	16	0	42.5	E	v3	41	16	0	43.5	E	v0	8.45683e+06	14.99	8.45682e+06	9.4811
40	18	0	42.5	A1	v3	41	18	0	43.5	A2	v0	8.4569e+06	14.99	8.45689e+06	10.7723
40	21	0	42.5	A1	v3	39	21	0	41.5	A2	v0	8.70362e+06	14.99	8.70364e+06	-24.3337
40	21	0	42.5	A1	v3	41	21	0	43.5	A2	v0	8.45703e+06	14.99	8.45701e+06	14.9726
40	21	0	42.5	A2	v3	39	21	0	41.5	A1	v0	8.70362e+06	14.99	8.70364e+06	-24.3337
40	21	0	42.5	A2	v3	41	21	0	43.5	A1	v0	8.45703e+06	14.99	8.45701e+06	14.9726
40	24	0	42.5	A1	v3	39	24	0	41.5	A2	v0	8.70373e+06	14.99	8.70375e+06	-22.3125
40	27	0	42.5	A2	v3	39	27	0	41.5	A1	v0	8.70384e+06	14.99	8.70386e+06	-18.3138
40	30	0	42.5	A1	v3	41	30	0	43.5	A2	v0	8.45741e+06	14.99	8.45737e+06	39.177
40	30	0	42.5	A1	v3	39	30	0	41.5	A2	v0	8.70393e+06	14.99	8.70395e+06	-16.8863
40	-17	0	42.5	E	v3	41	17	0	43.5	E	v0	8.45686e+06	14.99	8.45685e+06	11.8521
40	-14	0	42.5	E	v3	41	14	0	43.5	E	v0	8.45675e+06	14.99	8.45675e+06	-0.2196
41	0	0	43.5	A2	v3	42	0	0	44.5	A1	v0	8.45339e+06	14.99	8.45339e+06	-0.3253
41	0	0	43.5	A2	v3	40	0	0	42.5	A1	v0	8.70616e+06	14.99	8.70616e+06	0.536
41	6	0	43.5	A2	v3	42	6	0	44.5	A1	v0	8.45342e+06	14.99	8.45343e+06	-16.7835
41	9	0	43.5	A1	v3	40	9	0	42.5	A2	v0	8.70623e+06	14.99	8.70625e+06	-20.2738
41	9	0	43.5	A1	v3	42	9	0	44.5	A2	v0	8.45349e+06	14.99	8.45349e+06	0.4791
41	12	0	43.5	A2	v3	42	12	0	44.5	A1	v0	8.45357e+06	14.99	8.45357e+06	-3.5054
41	12	0	43.5	A2	v3	40	12	0	42.5	A1	v0	8.70632e+06	14.99	8.70632e+06	1.104
41	15	0	43.5	A1	v3	42	15	0	44.5	A2	v0	8.45367e+06	14.99	8.45367e+06	-0.1029
41	15	0	43.5	A1	v3	40	15	0	42.5	A2	v0	8.70641e+06	14.99	8.70641e+06	-4.8096
41	16	0	43.5	E	v3	42	16	0	44.5	E	v0	8.45371e+06	14.99	8.4537e+06	11.1741
41	16	0	43.5	E	v3	40	16	0	42.5	E	v0	8.70644e+06	14.99	8.70644e+06	-2.3451
41	18	0	43.5	A2	v3	42	18	0	44.5	A1	v0	8.45379e+06	14.99	8.45378e+06	12.576
41	18	0	43.5	A2	v3	40	18	0	42.5	A1	v0	8.70651e+06	14.99	8.70651e+06	-0.7469
41	19	0	43.5	E	v3	40	19	0	42.5	E	v0	8.70656e+06	14.99	8.70655e+06	9.4953
41	24	0	43.5	A2	v3	42	24	0	44.5	A1	v0	8.45405e+06	14.99	8.45403e+06	19.8415
41	24	0	43.5	A2	v3	40	24	0	42.5	A1	v0	8.70672e+06	14.99	8.70674e+06	-15.197
41	27	0	43.5	A1	v3	40	27	0	42.5	A2	v0	8.70684e+06	14.99	8.70685e+06	-3.7234
41	30	0	43.5	A2	v3	42	30	0	44.5	A1	v0	8.45429e+06	14.99	8.45428e+06	3.5428
41	30	0	43.5	A2	v3	40	30	0	42.5	A1	v0	8.70692e+06	14.99	8.70695e+06	-22.4871
41	-23	0	43.5	E	v3	42	23	0	44.5	E	v0	8.454e+06	14.99	8.45399e+06	12.4068
41	-17	0	43.5	E	v3	42	17	0	44.5	E	v0	8.45375e+06	14.99	8.45374e+06	12.4521
42	0	0	44.5	A1	v3	43	0	0	45.5	A2	v0	8.45027e+06	59.958	8.45026e+06	8.1643
42	0	0	44.5	A1	v3	41	0	0	43.5	A2	v0	8.70912e+06	59.958	8.70912e+06	1.7783
42	9	0	44.5	A2	v3	43	9	0	45.5	A1	v0	8.45037e+06	14.99	8.45037e+06	3.0495
42	12	0	44.5	A1	v3	43	12	0	45.5	A2	v0	8.45045e+06	14.99	8.45045e+06	-1.1012
42	12	0	44.5	A1	v3	41	12	0	43.5	A2	v0	8.70927e+06	14.99	8.70929e+06	-17.1376
42	13	0	44.5	E	v3	43	13	0	45.5	E	v0	8.45048e+06	14.99	8.45048e+06	1.843
42	15	0	44.5	A2	v3	41	15	0	43.5	A1	v0	8.70937e+06	14.99	8.70938e+06	-6.6845
42	15	0	44.5	A2	v3	43	15	0	45.5	A1	v0	8.45056e+06	14.99	8.45055e+06	6.4188
42	16	0	44.5	E	v3	43	16	0	45.5	E	v0	8.4506e+06	14.99	8.45059e+06	8.8839
42	16	0	44.5	E	v3	41	16	0	43.5	E	v0	8.7094e+06	14.99	8.70941e+06	-7.7224
42	18	0	44.5	A1	v3	43	18	0	45.5	A2	v0	8.45067e+06	14.99	8.45067e+06	7.3475
42	18	0	44.5	A1	v3	41	18	0	43.5	A2	v0	8.70948e+06	14.99	8.70948e+06	-2.5995
42	19	0	44.5	E	v3	43	19	0	45.5	E	v0	8.45072e+06	14.99	8.45071e+06	9.051
42	19	0	44.5	E	v3	41	19	0	43.5	E	v0	8.70952e+06	14.99	8.70952e+06	-0.3268
42	21	0	44.5	A2	v3	41	21	0	43.5	A1	v0	8.70959e+06	14.99	8.7096e+06	-5.3689
42	24	0	44.5	A1	v3	43	24	0	45.5	A2	v0	8.45095e+06	14.99	8.45093e+06	12.6804
42	24	0	44.5	A1	v3	41	24	0	43.5	A2	v0	8.7097e+06	14.99	8.70972e+06	-13.6563
42	27	0	44.5	A2	v3	41	27	0	43.5	A1	v0	8.70982e+06	14.99	8.70983e+06	-14.6706
42	30	0	44.5	A1	v3	43	30	0	45.5	A2	v0	8.45122e+06	14.99	8.4512e+06	14.9432
42	30	0	44.5	A1	v3	41	30	0	43.5	A2	v0	8.70991e+06	14.99	8.70994e+06	-28.0507
42	-17	0	44.5	E	v3	43	17	0	45.5	E	v0	8.45063e+06	14.99	8.45063e+06	8.4448
42	-14	0	44.5	E	v3	43	14	0	45.5	E	v0	8.45052e+06	14.99	8.45051e+06	6.3111
43	0	0	45.5	A2	v3	44	0	0	46.5	A1	v0	8.44714e+06	14.99	8.44713e+06	3.2601
43	0	0	45.5	A2	v3	42	0	0	44.5	A1	v0	8.71208e+06	14.99	8.71208e+06	4.9507
43	9	0	45.5	A1	v3	42	9	0	44.5	A2	v0	8.71216e+06	14.99	8.71218e+06	-11.9689
43	9	0	45.5	A1	v3	44	9	0	46.5	A2	v0	8.44724e+06	14.99	8.44724e+06	-6.3312
43	12	0	45.5	A2	v3	42	12	0	44.5	A1	v0	8.71224e+06	14.99	8.71225e+06	-12.6019
43	12	0	45.5	A2	v3	44	12	0	46.5	A1	v0	8.44732e+06	14.99	8.44733e+06	-3.7979
43	13	0	45.5	E	v3	44	13	0	46.5	E	v0	8.44736e+06	14.99	8.44736e+06	2.5924
43	15	0	45.5	A1	v3	44	15	0	46.5	A2	v0	8.44744e+06	14.99	8.44743e+06	5.3821
43	15	0	45.5	A1	v3	42	15	0	44.5	A2	v0	8.71234e+06	14.99	8.71234e+06	-5.6484
43	16	0	45.5	E	v3	44	16	0	46.5	E	v0	8.44748e+06	14.99	8.44747e+06	5.008
43	16	0	45.5	E	v3	42	16	0	44.5	E	v0	8.71238e+06	14.99	8.71238e+06	-3.0248
43	18	0	45.5	A2	v3	42	18	0	44.5	A1	v0	8.71245e+06	14.99	8.71245e+06	-1.9413
43	18	0	45.5	A2	v3	44	18	0	46.5	A1	v0	8.44756e+06	14.99	8.44755e+06	7.976
43	19	0	45.5	E	v3	42	19	0	44.5	E	v0	8.71249e+06	14.99	8.71249e+06	-1.9803
43	19	0	45.5	E	v3	44	19	0	46.5	E	v0	8.44761e+06	14.99	8.4476e+06	11.9199
43	21	0	45.5	A1	v3	42	21	0	44.5	A2	v0	8.71256e+06	14.99	8.71257e+06	-7.753
43	24	0	45.5	A2	v3	44	24	0	46.5	A1	v0	8.44785e+06	14.99	8.44783e+06	19.8658
43	30	0	45.5	A2	v3	44	30	0	46.5	A1	v0	8.44812e+06	14.99	8.44811e+06	10.1153
43	30	0	45.5	A2	v3	42	30	0	44.5	A1	v0	8.71291e+06	14.99	8.71294e+06	-29.3507
43	-26	0	45.5	E	v3	44	26	0	46.5	E	v0	8.44794e+06	14.99	8.44793e+06	14.6134
43	-17	0	45.5	E	v3	42	17	0	44.5	E	v0	8.71241e+06	14.99	8.71241e+06	-4.6352
43	-17	0	45.5	E	v3	44	17	0	46.5	E	v0	8.44752e+06	14.99	8.44751e+06	8.5227
43	-14	0	45.5	E	v3	44	14	0	46.5	E	v0	8.4474e+06	14.99	8.44739e+06	9.2137
44	0	0	46.5	A1	v3	43	0	0	45.5	A2	v0	8.71503e+06	59.958	8.71503e+06	1.6691
44	0	0	46.5	A1	v3	45	0	0	47.5	A2	v0	8.444e+06	14.99	8.444e+06	2.0523
44	9	0	46.5	A2	v3	43	9	0	45.5	A1	v0	8.71513e+06	14.99	8.71513e+06	-4.8753
44	9	0	46.5	A2	v3	45	9	0	47.5	A1	v0	8.44411e+06	14.99	8.44412e+06	-11.7727
44	12	0	46.5	A1	v3	43	12	0	45.5	A2	v0	8.7152e+06	14.99	8.71521e+06	-8.9596
44	12	0	46.5	A1	v3	45	12	0	47.5	A2	v0	8.4442e+06	14.99	8.4442e+06	-0.2026
44	13	0	46.5	E	v3	45	13	0	47.5	E	v0	8.44424e+06	14.99	8.44424e+06	3.6197
44	15	0	46.5	A2	v3	43	15	0	45.5	A1	v0	8.71531e+06	59.958	8.71531e+06	-2.5866
44	15	0	46.5	A2	v3	45	15	0	47.5	A1	v0	8.44432e+06	14.99	8.44431e+06	4.5815
44	16	0	46.5	E	v3	43	16	0	45.5	E	v0	8.71531e+06	59.958	8.71534e+06	-38.3029
44	16	0	46.5	E	v3	45	16	0	47.5	E	v0	8.44436e+06	14.99	8.44435e+06	5.242
44	18	0	46.5	A1	v3	45	18	0	47.5	A2	v0	8.44444e+06	14.99	8.44444e+06	6.966
44	18	0	46.5	A1	v3	43	18	0	45.5	A2	v0	8.71542e+06	14.99	8.71542e+06	-4.1526
44	19	0	46.5	E	v3	43	19	0	45.5	E	v0	8.71546e+06	14.99	8.71546e+06	-3.2432
44	19	0	46.5	E	v3	45	19	0	47.5	E	v0	8.4445e+06	14.99	8.44448e+06	13.1211
44	21	0	46.5	A2	v3	43	21	0	45.5	A1	v0	8.71554e+06	14.99	8.71554e+06	-4.4324
44	22	0	46.5	E	v3	43	22	0	45.5	E	v0	8.71558e+06	14.99	8.71559e+06	-4.6483
44	24	0	46.5	A1	v3	45	24	0	47.5	A2	v0	8.44474e+06	14.99	8.44473e+06	16.212
44	27	0	46.5	A2	v3	45	27	0	47.5	A1	v0	8.4449e+06	14.99	8.44488e+06	16.5561
44	28	0	46.5	E	v3	45	28	0	47.5	E	v0	8.44495e+06	14.99	8.44493e+06	17.2945
44	30	0	46.5	A1	v3	43	30	0	45.5	A2	v0	8.7159e+06	14.99	8.71593e+06	-25.7596
44	-20	0	46.5	E	v3	45	20	0	47.5	E	v0	8.44454e+06	14.99	8.44453e+06	10.9328
44	-17	0	46.5	E	v3	45	17	0	47.5	E	v0	8.4444e+06	14.99	8.44439e+06	7.8886
44	-17	0	46.5	E	v3	43	17	0	45.5	E	v0	8.71538e+06	14.99	8.71538e+06	-0.3984
44	-14	0	46.5	E	v3	43	14	0	45.5	E	v0	8.71527e+06	14.99	8.71527e+06	-0.7039
44	-14	0	46.5	E	v3	45	14	0	47.5	E	v0	8.44428e+06	14.99	8.44427e+06	6.678
45	0	0	47.5	A2	v3	46	0	0	48.5	A1	v0	8.44087e+06	14.99	8.44087e+06	-2.3522
45	0	0	47.5	A2	v3	44	0	0	46.5	A1	v0	8.71799e+06	14.99	8.71798e+06	6.334
45	6	0	47.5	A2	v3	44	6	0	46.5	A1	v0	8.71803e+06	14.99	8.71803e+06	-6.4381
45	6	0	47.5	A2	v3	46	6	0	48.5	A1	v0	8.4409e+06	14.99	8.44092e+06	-23.446
45	9	0	47.5	A1	v3	46	9	0	48.5	A2	v0	8.44098e+06	14.99	8.44099e+06	-10.2755
45	9	0	47.5	A1	v3	44	9	0	46.5	A2	v0	8.71809e+06	14.99	8.71809e+06	-4.5996
45	12	0	47.5	A2	v3	46	12	0	48.5	A1	v0	8.44108e+06	14.99	8.44108e+06	1.5915
45	12	0	47.5	A2	v3	44	12	0	46.5	A1	v0	8.71816e+06	14.99	8.71817e+06	-6.1982
45	13	0	47.5	E	v3	46	13	0	48.5	E	v0	8.44112e+06	14.99	8.44111e+06	4.3262
45	13	0	47.5	E	v3	44	13	0	46.5	E	v0	8.7182e+06	59.958	8.7182e+06	-2.763
45	15	0	47.5	A1	v3	46	15	0	48.5	A2	v0	8.44119e+06	14.99	8.44119e+06	4.3173
45	15	0	47.5	A1	v3	44	15	0	46.5	A2	v0	8.71827e+06	14.99	8.71827e+06	-3.4808
45	16	0	47.5	E	v3	44	16	0	46.5	E	v0	8.7183e+06	14.99	8.71831e+06	-2.9188
45	16	0	47.5	E	v3	46	16	0	48.5	E	v0	8.44123e+06	14.99	8.44123e+06	3.2906
45	18	0	47.5	A2	v3	46	18	0	48.5	A1	v0	8.44133e+06	14.99	8.44132e+06	9.1139
45	18	0	47.5	A2	v3	44	18	0	46.5	A1	v0	8.71838e+06	14.99	8.71839e+06	-3.2218
45	19	0	47.5	E	v3	46	19	0	48.5	E	v0	8.44138e+06	14.99	8.44137e+06	12.9539
45	19	0	47.5	E	v3	44	19	0	46.5	E	v0	8.71842e+06	14.99	8.71843e+06	-4.0989
45	21	0	47.5	A1	v3	44	21	0	46.5	A2	v0	8.71851e+06	14.99	8.71851e+06	-2.285
45	21	0	47.5	A1	v3	46	21	0	48.5	A2	v0	8.44148e+06	14.99	8.44147e+06	13.1195
45	22	0	47.5	E	v3	44	22	0	46.5	E	v0	8.71855e+06	14.99	8.71856e+06	-9.4125
45	24	0	47.5	A2	v3	46	24	0	48.5	A1	v0	8.44164e+06	14.99	8.44162e+06	14.6085
45	24	0	47.5	A2	v3	44	24	0	46.5	A1	v0	8.71864e+06	14.99	8.71865e+06	-7.7905
45	27	0	47.5	A1	v3	44	27	0	46.5	A2	v0	8.71878e+06	14.99	8.71879e+06	-3.5253
45	28	0	47.5	E	v3	46	28	0	48.5	E	v0	8.44185e+06	14.99	8.44184e+06	13.4666
45	-26	0	47.5	E	v3	44	26	0	46.5	E	v0	8.71874e+06	14.99	8.71874e+06	-1.2316
45	-26	0	47.5	E	v3	46	26	0	48.5	E	v0	8.44174e+06	14.99	8.44173e+06	15.9517
45	-23	0	47.5	E	v3	44	23	0	46.5	E	v0	8.7186e+06	14.99	8.7186e+06	-3.7303
45	-20	0	47.5	E	v3	44	20	0	46.5	E	v0	8.71847e+06	14.99	8.71847e+06	0.6505
45	-17	0	47.5	E	v3	44	17	0	46.5	E	v0	8.71834e+06	14.99	8.71834e+06	-3.4778
45	-17	0	47.5	E	v3	46	17	0	48.5	E	v0	8.44128e+06	14.99	8.44127e+06	9.2405
45	-14	0	47.5	E	v3	44	14	0	46.5	E	v0	8.7182e+06	59.958	8.71823e+06	-35.8683
45	-14	0	47.5	E	v3	46	14	0	48.5	E	v0	8.44115e+06	14.99	8.44115e+06	4.101
46	0	0	48.5	A1	v3	47	0	0	49.5	A2	v0	8.43774e+06	14.99	8.43774e+06	4.7387
46	0	0	48.5	A1	v3	45	0	0	47.5	A2	v0	8.72094e+06	59.958	8.72094e+06	3.0664
46	6	0	48.5	A1	v3	47	6	0	49.5	A2	v0	8.43779e+06	14.99	8.43779e+06	-5.8856
46	6	0	48.5	A1	v3	45	6	0	47.5	A2	v0	8.72094e+06	59.958	8.72098e+06	-45.7873
46	9	0	48.5	A2	v3	45	9	0	47.5	A1	v0	8.72104e+06	14.99	8.72104e+06	-3.9351
46	9	0	48.5	A2	v3	47	9	0	49.5	A1	v0	8.43785e+06	14.99	8.43786e+06	-10.5318
46	12	0	48.5	A1	v3	45	12	0	47.5	A2	v0	8.72112e+06	14.99	8.72113e+06	-5.5044
46	12	0	48.5	A1	v3	47	12	0	49.5	A2	v0	8.43795e+06	14.99	8.43795e+06	0.6862
46	13	0	48.5	E	v3	47	13	0	49.5	E	v0	8.43799e+06	14.99	8.43799e+06	5.3126
46	15	0	48.5	A2	v3	47	15	0	49.5	A1	v0	8.43807e+06	14.99	8.43807e+06	1.2926
46	15	0	48.5	A2	v3	45	15	0	47.5	A1	v0	8.72123e+06	14.99	8.72123e+06	-0.8227
46	16	0	48.5	E	v3	47	16	0	49.5	E	v0	8.43811e+06	14.99	8.43811e+06	6.3493
46	16	0	48.5	E	v3	45	16	0	47.5	E	v0	8.72127e+06	14.99	8.72127e+06	-0.2867
46	18	0	48.5	A1	v3	45	18	0	47.5	A2	v0	8.72134e+06	14.99	8.72135e+06	-4.2301
46	18	0	48.5	A1	v3	47	18	0	49.5	A2	v0	8.43821e+06	14.99	8.4382e+06	6.0257
46	19	0	48.5	E	v3	47	19	0	49.5	E	v0	8.43826e+06	14.99	8.43825e+06	6.9217
46	19	0	48.5	E	v3	45	19	0	47.5	E	v0	8.72139e+06	14.99	8.72139e+06	-2.4332
46	21	0	48.5	A2	v3	45	21	0	47.5	A1	v0	8.72148e+06	14.99	8.72148e+06	-2.7925
46	21	0	48.5	A2	v3	47	21	0	49.5	A1	v0	8.43836e+06	14.99	8.43835e+06	12.529
46	22	0	48.5	E	v3	45	22	0	47.5	E	v0	8.72152e+06	14.99	8.72153e+06	-6.6823
46	24	0	48.5	A1	v3	45	24	0	47.5	A2	v0	8.72162e+06	14.99	8.72162e+06	-2.8551
46	24	0	48.5	A1	v3	47	24	0	49.5	A2	v0	8.43852e+06	14.99	8.43851e+06	9.9581
46	27	0	48.5	A2	v3	47	27	0	49.5	A1	v0	8.43869e+06	14.99	8.43868e+06	4.467
46	27	0	48.5	A2	v3	45	27	0	47.5	A1	v0	8.72176e+06	14.99	8.72177e+06	-10.5534
46	28	0	48.5	E	v3	47	28	0	49.5	E	v0	8.43876e+06	14.99	8.43874e+06	21.0936
46	-29	0	48.5	E	v3	47	29	0	49.5	E	v0	8.43882e+06	14.99	8.4388e+06	25.7237
46	-26	0	48.5	E	v3	47	26	0	49.5	E	v0	8.43864e+06	14.99	8.43863e+06	8.1707
46	-23	0	48.5	E	v3	45	23	0	47.5	E	v0	8.72158e+06	14.99	8.72158e+06	-1.1824
46	-20	0	48.5	E	v3	45	20	0	47.5	E	v0	8.72144e+06	14.99	8.72144e+06	4.5833
46	-20	0	48.5	E	v3	47	20	0	49.5	E	v0	8.4383e+06	14.99	8.4383e+06	4.3345
46	-17	0	48.5	E	v3	47	17	0	49.5	E	v0	8.43816e+06	14.99	8.43815e+06	4.7846
46	-17	0	48.5	E	v3	45	17	0	47.5	E	v0	8.72131e+06	14.99	8.72131e+06	-1.8669
46	-14	0	48.5	E	v3	45	14	0	47.5	E	v0	8.7212e+06	14.99	8.72119e+06	2.3987
46	-14	0	48.5	E	v3	47	14	0	49.5	E	v0	8.43803e+06	14.99	8.43802e+06	6.88
46	-11	0	48.5	E	v3	45	11	0	47.5	E	v0	8.72108e+06	14.99	8.7211e+06	-12.9243
47	0	0	49.5	A2	v3	48	0	0	50.5	A1	v0	8.43461e+06	14.99	8.4346e+06	4.7404
47	0	0	49.5	A2	v3	46	0	0	48.5	A1	v0	8.72389e+06	14.99	8.72388e+06	2.0699
47	6	0	49.5	A2	v3	46	6	0	48.5	A1	v0	8.72392e+06	14.99	8.72393e+06	-12.4461
47	6	0	49.5	A2	v3	48	6	0	50.5	A1	v0	8.43465e+06	14.99	8.43466e+06	-9.5303
47	9	0	49.5	A1	v3	48	9	0	50.5	A2	v0	8.43472e+06	14.99	8.43473e+06	-8.6424
47	9	0	49.5	A1	v3	46	9	0	48.5	A2	v0	8.72399e+06	14.99	8.724e+06	-4.3695
47	12	0	49.5	A2	v3	48	12	0	50.5	A1	v0	8.43482e+06	14.99	8.43482e+06	1.88
47	12	0	49.5	A2	v3	46	12	0	48.5	A1	v0	8.72407e+06	14.99	8.72408e+06	-6.8659
47	13	0	49.5	E	v3	48	13	0	50.5	E	v0	8.43486e+06	14.99	8.43486e+06	4.482
47	13	0	49.5	E	v3	46	13	0	48.5	E	v0	8.72411e+06	14.99	8.72411e+06	-3.5673
47	15	0	49.5	A1	v3	48	15	0	50.5	A2	v0	8.43494e+06	14.99	8.43494e+06	2.7038
47	15	0	49.5	A1	v3	46	15	0	48.5	A2	v0	8.72418e+06	14.99	8.72419e+06	-2.3932
47	16	0	49.5	E	v3	48	16	0	50.5	E	v0	8.43499e+06	14.99	8.43498e+06	6.625
47	16	0	49.5	E	v3	46	16	0	48.5	E	v0	8.72423e+06	14.99	8.72423e+06	1.6851
47	18	0	49.5	A2	v3	46	18	0	48.5	A1	v0	8.72431e+06	14.99	8.72431e+06	-2.366
47	18	0	49.5	A2	v3	48	18	0	50.5	A1	v0	8.43508e+06	14.99	8.43508e+06	4.5979
47	19	0	49.5	E	v3	46	19	0	48.5	E	v0	8.72435e+06	14.99	8.72436e+06	-6.0253
47	19	0	49.5	E	v3	48	19	0	50.5	E	v0	8.43514e+06	14.99	8.43513e+06	6.717
47	21	0	49.5	A1	v3	46	21	0	48.5	A2	v0	8.72445e+06	14.99	8.72445e+06	-2.9402
47	21	0	49.5	A1	v3	48	21	0	50.5	A2	v0	8.43525e+06	14.99	8.43524e+06	10.2057
47	22	0	49.5	E	v3	46	22	0	48.5	E	v0	8.72449e+06	14.99	8.7245e+06	-8.432
47	24	0	49.5	A2	v3	46	24	0	48.5	A1	v0	8.72459e+06	14.99	8.7246e+06	-2.4936
47	24	0	49.5	A2	v3	48	24	0	50.5	A1	v0	8.43542e+06	14.99	8.43541e+06	10.9549
47	25	0	49.5	E	v3	46	25	0	48.5	E	v0	8.72464e+06	14.99	8.72465e+06	-7.3916
47	27	0	49.5	A1	v3	48	27	0	50.5	A2	v0	8.4356e+06	14.99	8.43558e+06	12.2337
47	28	0	49.5	E	v3	46	28	0	48.5	E	v0	8.72475e+06	14.99	8.7248e+06	-53.9324
47	28	0	49.5	E	v3	48	28	0	50.5	E	v0	8.43566e+06	14.99	8.43564e+06	15.2924
47	-29	0	49.5	E	v3	48	29	0	50.5	E	v0	8.43572e+06	14.99	8.4357e+06	13.6665
47	-26	0	49.5	E	v3	48	26	0	50.5	E	v0	8.43553e+06	14.99	8.43552e+06	5.3486
47	-23	0	49.5	E	v3	46	23	0	48.5	E	v0	8.72454e+06	14.99	8.72455e+06	-10.9547
47	-20	0	49.5	E	v3	46	20	0	48.5	E	v0	8.7244e+06	14.99	8.7244e+06	-3.6751
47	-20	0	49.5	E	v3	48	20	0	50.5	E	v0	8.43519e+06	14.99	8.43518e+06	8.5296
47	-17	0	49.5	E	v3	48	17	0	50.5	E	v0	8.43504e+06	14.99	8.43503e+06	8.0123
47	-17	0	49.5	E	v3	46	17	0	48.5	E	v0	8.72427e+06	14.99	8.72427e+06	-0.0481
47	-14	0	49.5	E	v3	46	14	0	48.5	E	v0	8.72415e+06	14.99	8.72415e+06	-2.2091
47	-14	0	49.5	E	v3	48	14	0	50.5	E	v0	8.4349e+06	14.99	8.4349e+06	4.5239
47	-11	0	49.5	E	v3	46	11	0	48.5	E	v0	8.72404e+06	14.99	8.72405e+06	-11.5945
48	0	0	50.5	A1	v3	49	0	0	51.5	A2	v0	8.43147e+06	14.99	8.43146e+06	5.7499
48	0	0	50.5	A1	v3	47	0	0	49.5	A2	v0	8.72683e+06	14.99	8.72683e+06	1.8559
48	6	0	50.5	A1	v3	49	6	0	51.5	A2	v0	8.43151e+06	14.99	8.43152e+06	-13.6923
48	6	0	50.5	A1	v3	47	6	0	49.5	A2	v0	8.72687e+06	14.99	8.72688e+06	-13.4294
48	9	0	50.5	A2	v3	47	9	0	49.5	A1	v0	8.72695e+06	14.99	8.72695e+06	-0.7944
48	9	0	50.5	A2	v3	49	9	0	51.5	A1	v0	8.43158e+06	14.99	8.43159e+06	-7.6029
48	12	0	50.5	A1	v3	49	12	0	51.5	A2	v0	8.43169e+06	14.99	8.43169e+06	1.8773
48	12	0	50.5	A1	v3	47	12	0	49.5	A2	v0	8.72703e+06	14.99	8.72703e+06	-6.9724
48	13	0	50.5	E	v3	49	13	0	51.5	E	v0	8.43173e+06	14.99	8.43173e+06	4.8342
48	13	0	50.5	E	v3	47	13	0	49.5	E	v0	8.72706e+06	14.99	8.72707e+06	-5.2751
48	15	0	50.5	A2	v3	49	15	0	51.5	A1	v0	8.43181e+06	14.99	8.43181e+06	1.6574
48	15	0	50.5	A2	v3	47	15	0	49.5	A1	v0	8.72714e+06	14.99	8.72714e+06	-2.1831
48	16	0	50.5	E	v3	47	16	0	49.5	E	v0	8.72718e+06	14.99	8.72718e+06	-2.6857
48	16	0	50.5	E	v3	49	16	0	51.5	E	v0	8.43186e+06	14.99	8.43186e+06	2.6203
48	18	0	50.5	A1	v3	47	18	0	49.5	A2	v0	8.72727e+06	14.99	8.72727e+06	-3.011
48	18	0	50.5	A1	v3	49	18	0	51.5	A2	v0	8.43196e+06	14.99	8.43196e+06	5.4311
48	19	0	50.5	E	v3	47	19	0	49.5	E	v0	8.72731e+06	14.99	8.72732e+06	-1.3692
48	19	0	50.5	E	v3	49	19	0	51.5	E	v0	8.43201e+06	14.99	8.43201e+06	4.5466
48	21	0	50.5	A2	v3	47	21	0	49.5	A1	v0	8.72741e+06	14.99	8.72741e+06	-3.0118
48	21	0	50.5	A2	v3	49	21	0	51.5	A1	v0	8.43213e+06	14.99	8.43212e+06	6.1507
48	22	0	50.5	E	v3	47	22	0	49.5	E	v0	8.72746e+06	14.99	8.72746e+06	-8.3493
48	22	0	50.5	E	v3	49	22	0	51.5	E	v0	8.43218e+06	14.99	8.43218e+06	7.4855
48	24	0	50.5	A1	v3	47	24	0	49.5	A2	v0	8.72756e+06	14.99	8.72757e+06	-6.6878
48	24	0	50.5	A1	v3	49	24	0	51.5	A2	v0	8.43231e+06	14.99	8.4323e+06	8.9057
48	25	0	50.5	E	v3	47	25	0	49.5	E	v0	8.72762e+06	14.99	8.72762e+06	0.1587
48	27	0	50.5	A2	v3	49	27	0	51.5	A1	v0	8.4325e+06	14.99	8.43248e+06	16.2176
48	28	0	50.5	E	v3	47	28	0	49.5	E	v0	8.72777e+06	14.99	8.72778e+06	-11.4689
48	30	0	50.5	A1	v3	47	30	0	49.5	A2	v0	8.72787e+06	14.99	8.72789e+06	-12.9366
48	30	0	50.5	A1	v3	49	30	0	51.5	A2	v0	8.43268e+06	14.99	8.43267e+06	7.1616
48	-29	0	50.5	E	v3	47	29	0	49.5	E	v0	8.72783e+06	14.99	8.72783e+06	-7.5665
48	-26	0	50.5	E	v3	49	26	0	51.5	E	v0	8.43242e+06	14.99	8.43242e+06	5.0875
48	-23	0	50.5	E	v3	47	23	0	49.5	E	v0	8.72751e+06	14.99	8.72752e+06	-2.1512
48	-20	0	50.5	E	v3	47	20	0	49.5	E	v0	8.72736e+06	14.99	8.72736e+06	0.1745
48	-20	0	50.5	E	v3	49	20	0	51.5	E	v0	8.43208e+06	14.99	8.43206e+06	11.9264
48	-17	0	50.5	E	v3	47	17	0	49.5	E	v0	8.72722e+06	14.99	8.72723e+06	-1.6049
48	-17	0	50.5	E	v3	49	17	0	51.5	E	v0	8.43191e+06	14.99	8.43191e+06	3.3362
48	-14	0	50.5	E	v3	49	14	0	51.5	E	v0	8.43177e+06	14.99	8.43177e+06	3.0301
48	-11	0	50.5	E	v3	49	11	0	51.5	E	v0	8.43166e+06	14.99	8.43165e+06	2.467
49	0	0	51.5	A2	v3	48	0	0	50.5	A1	v0	8.72978e+06	14.99	8.72978e+06	4.234
49	0	0	51.5	A2	v3	50	0	0	52.5	A1	v0	8.42833e+06	14.99	8.42832e+06	2.9733
49	6	0	51.5	A2	v3	50	6	0	52.5	A1	v0	8.42837e+06	14.99	8.42838e+06	-13.8719
49	9	0	51.5	A1	v3	48	9	0	50.5	A2	v0	8.72988e+06	14.99	8.72989e+06	-10.2866
49	9	0	51.5	A1	v3	50	9	0	52.5	A2	v0	8.42845e+06	14.99	8.42846e+06	-10.1089
49	12	0	51.5	A2	v3	50	12	0	52.5	A1	v0	8.42856e+06	14.99	8.42856e+06	0.98
49	12	0	51.5	A2	v3	48	12	0	50.5	A1	v0	8.72998e+06	14.99	8.72998e+06	-4.013
49	13	0	51.5	E	v3	50	13	0	52.5	E	v0	8.4286e+06	14.99	8.4286e+06	4.2728
49	13	0	51.5	E	v3	48	13	0	50.5	E	v0	8.73002e+06	14.99	8.73002e+06	-0.6417
49	15	0	51.5	A1	v3	48	15	0	50.5	A2	v0	8.73009e+06	14.99	8.7301e+06	-3.1772
49	15	0	51.5	A1	v3	50	15	0	52.5	A2	v0	8.42869e+06	14.99	8.42868e+06	2.6523
49	16	0	51.5	E	v3	48	16	0	50.5	E	v0	8.73014e+06	14.99	8.73014e+06	-1.6934
49	16	0	51.5	E	v3	50	16	0	52.5	E	v0	8.42874e+06	14.99	8.42873e+06	6.9282
49	18	0	51.5	A2	v3	48	18	0	50.5	A1	v0	8.73023e+06	14.99	8.73023e+06	-1.6537
49	19	0	51.5	E	v3	48	19	0	50.5	E	v0	8.73027e+06	14.99	8.73028e+06	-4.9385
49	21	0	51.5	A1	v3	50	21	0	52.5	A2	v0	8.42901e+06	14.99	8.429e+06	4.2629
49	21	0	51.5	A1	v3	48	21	0	50.5	A2	v0	8.73037e+06	14.99	8.73038e+06	-4.7899
49	22	0	51.5	E	v3	48	22	0	50.5	E	v0	8.73042e+06	14.99	8.73043e+06	-4.9185
49	24	0	51.5	A2	v3	48	24	0	50.5	A1	v0	8.73053e+06	14.99	8.73054e+06	-3.4283
49	27	0	51.5	A1	v3	50	27	0	52.5	A2	v0	8.42939e+06	14.99	8.42938e+06	8.9253
49	27	0	51.5	A1	v3	48	27	0	50.5	A2	v0	8.7307e+06	14.99	8.73071e+06	-1.8121
49	28	0	51.5	E	v3	48	28	0	50.5	E	v0	8.73075e+06	14.99	8.73076e+06	-10.0342
49	30	0	51.5	A2	v3	50	30	0	52.5	A1	v0	8.42959e+06	14.99	8.42958e+06	11.6443
49	30	0	51.5	A2	v3	48	30	0	50.5	A1	v0	8.73086e+06	14.99	8.73087e+06	-13.5947
49	-26	0	51.5	E	v3	50	26	0	52.5	E	v0	8.42932e+06	14.99	8.42931e+06	1.3933
49	-23	0	51.5	E	v3	48	23	0	50.5	E	v0	8.73048e+06	14.99	8.73048e+06	-2.935
49	-23	0	51.5	E	v3	50	23	0	52.5	E	v0	8.42914e+06	14.99	8.42912e+06	14.7455
49	-20	0	51.5	E	v3	48	20	0	50.5	E	v0	8.73033e+06	14.99	8.73033e+06	2.6566
49	-20	0	51.5	E	v3	50	20	0	52.5	E	v0	8.42896e+06	14.99	8.42894e+06	18.124
49	-17	0	51.5	E	v3	48	17	0	50.5	E	v0	8.73018e+06	14.99	8.73018e+06	-1.1267
49	-14	0	51.5	E	v3	50	14	0	52.5	E	v0	8.42864e+06	14.99	8.42864e+06	5.0991
49	-14	0	51.5	E	v3	48	14	0	50.5	E	v0	8.73006e+06	14.99	8.73006e+06	1.5046
50	0	0	52.5	A1	v3	51	0	0	53.5	A2	v0	8.42518e+06	14.99	8.42518e+06	1.2098
50	0	0	52.5	A1	v3	49	0	0	51.5	A2	v0	8.73272e+06	14.99	8.73272e+06	3.5189
50	6	0	52.5	A1	v3	51	6	0	53.5	A2	v0	8.42524e+06	14.99	8.42524e+06	-2.272
50	6	0	52.5	A1	v3	49	6	0	51.5	A2	v0	8.73276e+06	14.99	8.73277e+06	-11.2991
50	9	0	52.5	A2	v3	49	9	0	51.5	A1	v0	8.73283e+06	14.99	8.73284e+06	-6.153
50	9	0	52.5	A2	v3	51	9	0	53.5	A1	v0	8.42531e+06	14.99	8.42532e+06	-5.3655
50	12	0	52.5	A1	v3	51	12	0	53.5	A2	v0	8.42543e+06	14.99	8.42542e+06	3.0879
50	12	0	52.5	A1	v3	49	12	0	51.5	A2	v0	8.73293e+06	14.99	8.73293e+06	-2.7721
50	13	0	52.5	E	v3	51	13	0	53.5	E	v0	8.42547e+06	14.99	8.42546e+06	3.6997
50	13	0	52.5	E	v3	49	13	0	51.5	E	v0	8.73297e+06	14.99	8.73297e+06	0.7523
50	15	0	52.5	A2	v3	49	15	0	51.5	A1	v0	8.73304e+06	14.99	8.73305e+06	-3.2634
50	15	0	52.5	A2	v3	51	15	0	53.5	A1	v0	8.42556e+06	14.99	8.42555e+06	3.5924
50	16	0	52.5	E	v3	49	16	0	51.5	E	v0	8.73309e+06	14.99	8.73309e+06	-2.5195
50	16	0	52.5	E	v3	51	16	0	53.5	E	v0	8.42561e+06	14.99	8.4256e+06	5.4611
50	18	0	52.5	A1	v3	49	18	0	51.5	A2	v0	8.73318e+06	14.99	8.73318e+06	-3.676
50	18	0	52.5	A1	v3	51	18	0	53.5	A2	v0	8.42571e+06	14.99	8.42571e+06	3.396
50	19	0	52.5	E	v3	51	19	0	53.5	E	v0	8.42577e+06	14.99	8.42576e+06	6.0079
50	19	0	52.5	E	v3	49	19	0	51.5	E	v0	8.73323e+06	14.99	8.73323e+06	-5.0266
50	21	0	52.5	A2	v3	51	21	0	53.5	A1	v0	8.42589e+06	14.99	8.42588e+06	5.7438
50	21	0	52.5	A2	v3	49	21	0	51.5	A1	v0	8.73334e+06	14.99	8.73334e+06	-1.6634
50	22	0	52.5	E	v3	49	22	0	51.5	E	v0	8.73339e+06	14.99	8.73339e+06	-1.4211
50	22	0	52.5	E	v3	51	22	0	53.5	E	v0	8.42595e+06	14.99	8.42594e+06	4.6915
50	27	0	52.5	A2	v3	51	27	0	53.5	A1	v0	8.42628e+06	14.99	8.42628e+06	6.2481
50	27	0	52.5	A2	v3	49	27	0	51.5	A1	v0	8.73368e+06	14.99	8.73368e+06	-3.6795
50	28	0	52.5	E	v3	49	28	0	51.5	E	v0	8.73372e+06	14.99	8.73374e+06	-15.7313
50	28	0	52.5	E	v3	51	28	0	53.5	E	v0	8.42636e+06	14.99	8.42634e+06	10.8669
50	30	0	52.5	A1	v3	51	30	0	53.5	A2	v0	8.42649e+06	14.99	8.42648e+06	8.8883
50	30	0	52.5	A1	v3	49	30	0	51.5	A2	v0	8.73384e+06	14.99	8.73386e+06	-21.2096
50	-29	0	52.5	E	v3	51	29	0	53.5	E	v0	8.42641e+06	14.99	8.42641e+06	-6.8537
50	-29	0	52.5	E	v3	49	29	0	51.5	E	v0	8.73378e+06	14.99	8.7338e+06	-16.7916
50	-26	0	52.5	E	v3	49	26	0	51.5	E	v0	8.73362e+06	14.99	8.73362e+06	-0.434
50	-26	0	52.5	E	v3	51	26	0	53.5	E	v0	8.42621e+06	14.99	8.42621e+06	3.2619
50	-23	0	52.5	E	v3	51	23	0	53.5	E	v0	8.42603e+06	14.99	8.42601e+06	21.7543
50	-23	0	52.5	E	v3	49	23	0	51.5	E	v0	8.73345e+06	14.99	8.73345e+06	0.5011
50	-20	0	52.5	E	v3	49	20	0	51.5	E	v0	8.73328e+06	14.99	8.73328e+06	-3.4083
50	-20	0	52.5	E	v3	51	20	0	53.5	E	v0	8.42583e+06	14.99	8.42582e+06	8.8373
50	-17	0	52.5	E	v3	49	17	0	51.5	E	v0	8.73313e+06	14.99	8.73314e+06	-1.2978
50	-17	0	52.5	E	v3	51	17	0	53.5	E	v0	8.42566e+06	14.99	8.42565e+06	4.7562
50	-14	0	52.5	E	v3	49	14	0	51.5	E	v0	8.73301e+06	14.99	8.73301e+06	0.2586
50	-14	0	52.5	E	v3	51	14	0	53.5	E	v0	8.42551e+06	14.99	8.42551e+06	3.8378
50	-11	0	52.5	E	v3	49	11	0	51.5	E	v0	8.73289e+06	14.99	8.7329e+06	-8.8973
50	-11	0	52.5	E	v3	51	11	0	53.5	E	v0	8.42539e+06	14.99	8.42539e+06	2.2202
51	0	0	53.5	A2	v3	52	0	0	54.5	A1	v0	8.42204e+06	14.99	8.42204e+06	2.861
51	0	0	53.5	A2	v3	50	0	0	52.5	A1	v0	8.73566e+06	14.99	8.73566e+06	2.4196
51	6	0	53.5	A2	v3	50	6	0	52.5	A1	v0	8.7357e+06	14.99	8.73571e+06	-16.2574
51	9	0	53.5	A1	v3	50	9	0	52.5	A2	v0	8.73577e+06	14.99	8.73578e+06	-8.4678
51	9	0	53.5	A1	v3	52	9	0	54.5	A2	v0	8.42218e+06	14.99	8.42218e+06	-4.7618
51	10	0	53.5	E	v3	52	10	0	54.5	E	v0	8.42221e+06	14.99	8.42221e+06	-0.4652
51	12	0	53.5	A2	v3	50	12	0	52.5	A1	v0	8.73587e+06	14.99	8.73588e+06	-2.3378
51	12	0	53.5	A2	v3	52	12	0	54.5	A1	v0	8.42229e+06	14.99	8.42229e+06	2.2078
51	13	0	53.5	E	v3	52	13	0	54.5	E	v0	8.42233e+06	14.99	8.42233e+06	1.6188
51	13	0	53.5	E	v3	50	13	0	52.5	E	v0	8.73592e+06	14.99	8.73591e+06	2.517
51	15	0	53.5	A1	v3	50	15	0	52.5	A2	v0	8.73599e+06	14.99	8.736e+06	-1.2296
51	15	0	53.5	A1	v3	52	15	0	54.5	A2	v0	8.42242e+06	14.99	8.42242e+06	4.4803
51	16	0	53.5	E	v3	52	16	0	54.5	E	v0	8.42247e+06	14.99	8.42247e+06	0.6197
51	16	0	53.5	E	v3	50	16	0	52.5	E	v0	8.73604e+06	14.99	8.73604e+06	-0.0541
51	18	0	53.5	A2	v3	50	18	0	52.5	A1	v0	8.73614e+06	14.99	8.73614e+06	-1.2691
51	18	0	53.5	A2	v3	52	18	0	54.5	A1	v0	8.42259e+06	14.99	8.42258e+06	6.5284
51	19	0	53.5	E	v3	52	19	0	54.5	E	v0	8.42264e+06	14.99	8.42264e+06	0.351
51	19	0	53.5	E	v3	50	19	0	52.5	E	v0	8.73619e+06	14.99	8.73619e+06	-1.3191
51	21	0	53.5	A1	v3	50	21	0	52.5	A2	v0	8.73629e+06	14.99	8.7363e+06	-3.8095
51	21	0	53.5	A1	v3	52	21	0	54.5	A2	v0	8.42276e+06	14.99	8.42276e+06	3.1009
51	22	0	53.5	E	v3	50	22	0	52.5	E	v0	8.73635e+06	14.99	8.73635e+06	0.66
51	22	0	53.5	E	v3	52	22	0	54.5	E	v0	8.42283e+06	14.99	8.42282e+06	9.9447
51	24	0	53.5	A2	v3	50	24	0	52.5	A1	v0	8.73646e+06	14.99	8.73647e+06	-5.6566
51	25	0	53.5	E	v3	50	25	0	52.5	E	v0	8.73653e+06	14.99	8.73653e+06	-4.6435
51	27	0	53.5	A1	v3	50	27	0	52.5	A2	v0	8.73665e+06	14.99	8.73665e+06	-5.1072
51	27	0	53.5	A1	v3	52	27	0	54.5	A2	v0	8.42318e+06	14.99	8.42317e+06	12.9858
51	28	0	53.5	E	v3	50	28	0	52.5	E	v0	8.7367e+06	14.99	8.73672e+06	-15.0496
51	30	0	53.5	A2	v3	50	30	0	52.5	A1	v0	8.73682e+06	14.99	8.73684e+06	-15.6736
51	-29	0	53.5	E	v3	52	29	0	54.5	E	v0	8.42333e+06	14.99	8.42331e+06	20.1118
51	-29	0	53.5	E	v3	50	29	0	52.5	E	v0	8.73677e+06	14.99	8.73678e+06	-10.2874
51	-26	0	53.5	E	v3	52	26	0	54.5	E	v0	8.42311e+06	14.99	8.4231e+06	12.495
51	-23	0	53.5	E	v3	52	23	0	54.5	E	v0	8.42291e+06	14.99	8.42289e+06	14.9716
51	-20	0	53.5	E	v3	50	20	0	52.5	E	v0	8.73624e+06	14.99	8.73624e+06	-1.5165
51	-20	0	53.5	E	v3	52	20	0	54.5	E	v0	8.4227e+06	14.99	8.4227e+06	1.4567
51	-17	0	53.5	E	v3	50	17	0	52.5	E	v0	8.73609e+06	14.99	8.73609e+06	0.8935
51	-17	0	53.5	E	v3	52	17	0	54.5	E	v0	8.42253e+06	14.99	8.42252e+06	8.4589
51	-14	0	53.5	E	v3	52	14	0	54.5	E	v0	8.42238e+06	14.99	8.42237e+06	6.744
51	-14	0	53.5	E	v3	50	14	0	52.5	E	v0	8.73596e+06	14.99	8.73595e+06	2.3576
51	-11	0	53.5	E	v3	50	11	0	52.5	E	v0	8.73584e+06	14.99	8.73584e+06	-0.894
51	-11	0	53.5	E	v3	52	11	0	54.5	E	v0	8.42225e+06	14.99	8.42225e+06	2.7361
52	0	0	54.5	A1	v3	53	0	0	55.5	A2	v0	8.4189e+06	14.99	8.4189e+06	4.9317
52	0	0	54.5	A1	v3	51	0	0	53.5	A2	v0	8.7386e+06	14.99	8.73859e+06	4.5445
52	6	0	54.5	A1	v3	51	6	0	53.5	A2	v0	8.73864e+06	14.99	8.73865e+06	-12.0256
52	6	0	54.5	A1	v3	53	6	0	55.5	A2	v0	8.41895e+06	14.99	8.41896e+06	-8.4767
52	9	0	54.5	A2	v3	53	9	0	55.5	A1	v0	8.41904e+06	14.99	8.41904e+06	-1.9991
52	9	0	54.5	A2	v3	51	9	0	53.5	A1	v0	8.73872e+06	14.99	8.73872e+06	-6.4268
52	10	0	54.5	E	v3	53	10	0	55.5	E	v0	8.41907e+06	14.99	8.41907e+06	1.3903
52	12	0	54.5	A1	v3	51	12	0	53.5	A2	v0	8.73882e+06	14.99	8.73882e+06	-1.4988
52	12	0	54.5	A1	v3	53	12	0	55.5	A2	v0	8.41915e+06	14.99	8.41915e+06	2.5399
52	13	0	54.5	E	v3	51	13	0	53.5	E	v0	8.73886e+06	14.99	8.73886e+06	-0.7313
52	13	0	54.5	E	v3	53	13	0	55.5	E	v0	8.41919e+06	14.99	8.41919e+06	1.9299
52	15	0	54.5	A2	v3	51	15	0	53.5	A1	v0	8.73894e+06	14.99	8.73894e+06	-3.0585
52	15	0	54.5	A2	v3	53	15	0	55.5	A1	v0	8.41929e+06	14.99	8.41929e+06	2.9204
52	16	0	54.5	E	v3	51	16	0	53.5	E	v0	8.73899e+06	14.99	8.73899e+06	0.3201
52	16	0	54.5	E	v3	53	16	0	55.5	E	v0	8.41934e+06	14.99	8.41934e+06	2.8997
52	18	0	54.5	A1	v3	53	18	0	55.5	A2	v0	8.41945e+06	14.99	8.41945e+06	2.0384
52	18	0	54.5	A1	v3	51	18	0	53.5	A2	v0	8.73908e+06	14.99	8.73909e+06	-3.4126
52	19	0	54.5	E	v3	51	19	0	53.5	E	v0	8.73914e+06	14.99	8.73914e+06	0.5027
52	19	0	54.5	E	v3	53	19	0	55.5	E	v0	8.41951e+06	14.99	8.41951e+06	0.5323
52	21	0	54.5	A2	v3	53	21	0	55.5	A1	v0	8.41964e+06	14.99	8.41964e+06	4.7317
52	21	0	54.5	A2	v3	51	21	0	53.5	A1	v0	8.73925e+06	14.99	8.73925e+06	-1.6198
52	22	0	54.5	E	v3	53	22	0	55.5	E	v0	8.41971e+06	14.99	8.4197e+06	5.0452
52	24	0	54.5	A1	v3	51	24	0	53.5	A2	v0	8.73943e+06	14.99	8.73943e+06	-6.3137
52	24	0	54.5	A1	v3	53	24	0	55.5	A2	v0	8.41986e+06	14.99	8.41984e+06	13.1581
52	27	0	54.5	A2	v3	53	27	0	55.5	A1	v0	8.42007e+06	14.99	8.42006e+06	9.3553
52	27	0	54.5	A2	v3	51	27	0	53.5	A1	v0	8.73962e+06	14.99	8.73963e+06	-7.8751
52	28	0	54.5	E	v3	51	28	0	53.5	E	v0	8.73967e+06	14.99	8.73969e+06	-18.4626
52	30	0	54.5	A1	v3	51	30	0	53.5	A2	v0	8.73981e+06	14.99	8.73982e+06	-10.1565
52	30	0	54.5	A1	v3	53	30	0	55.5	A2	v0	8.4203e+06	14.99	8.42029e+06	10.4548
52	-29	0	54.5	E	v3	51	29	0	53.5	E	v0	8.73974e+06	14.99	8.73976e+06	-16.6309
52	-23	0	54.5	E	v3	53	23	0	55.5	E	v0	8.41978e+06	14.99	8.41977e+06	11.7885
52	-20	0	54.5	E	v3	51	20	0	53.5	E	v0	8.7392e+06	14.99	8.7392e+06	-0.6471
52	-20	0	54.5	E	v3	53	20	0	55.5	E	v0	8.41958e+06	14.99	8.41957e+06	3.7798
52	-17	0	54.5	E	v3	51	17	0	53.5	E	v0	8.73904e+06	14.99	8.73904e+06	0.3647
52	-17	0	54.5	E	v3	53	17	0	55.5	E	v0	8.4194e+06	14.99	8.41939e+06	4.567
52	-14	0	54.5	E	v3	51	14	0	53.5	E	v0	8.7389e+06	14.99	8.7389e+06	0.3195
52	-14	0	54.5	E	v3	53	14	0	55.5	E	v0	8.41923e+06	14.99	8.41924e+06	-2.0686
52	-11	0	54.5	E	v3	53	11	0	55.5	E	v0	8.41911e+06	14.99	8.41911e+06	2.6828
52	-11	0	54.5	E	v3	51	11	0	53.5	E	v0	8.73878e+06	14.99	8.73878e+06	0.3389
52	-8	0	54.5	E	v3	53	8	0	55.5	E	v0	8.419e+06	14.99	8.41901e+06	-12.0371
53	0	0	55.5	A2	v3	52	0	0	54.5	A1	v0	8.74153e+06	14.99	8.74153e+06	1.8106
53	0	0	55.5	A2	v3	54	0	0	56.5	A1	v0	8.41575e+06	14.99	8.41575e+06	4.1277
53	6	0	55.5	A2	v3	52	6	0	54.5	A1	v0	8.74158e+06	14.99	8.74159e+06	-11.7829
53	9	0	55.5	A1	v3	52	9	0	54.5	A2	v0	8.74166e+06	14.99	8.74166e+06	-5.4144
53	9	0	55.5	A1	v3	54	9	0	56.5	A2	v0	8.41589e+06	14.99	8.4159e+06	-2.1709
53	10	0	55.5	E	v3	52	10	0	54.5	E	v0	8.74169e+06	14.99	8.74169e+06	-2.2938
53	10	0	55.5	E	v3	54	10	0	56.5	E	v0	8.41593e+06	14.99	8.41593e+06	1.1964
53	12	0	55.5	A2	v3	52	12	0	54.5	A1	v0	8.74176e+06	14.99	8.74176e+06	0.657
53	12	0	55.5	A2	v3	54	12	0	56.5	A1	v0	8.41601e+06	14.99	8.41601e+06	-0.7094
53	13	0	55.5	E	v3	52	13	0	54.5	E	v0	8.7418e+06	14.99	8.7418e+06	3.0117
53	13	0	55.5	E	v3	54	13	0	56.5	E	v0	8.41605e+06	14.99	8.41605e+06	0.4394
53	15	0	55.5	A1	v3	52	15	0	54.5	A2	v0	8.74189e+06	14.99	8.74189e+06	-1.8417
53	15	0	55.5	A1	v3	54	15	0	56.5	A2	v0	8.41615e+06	14.99	8.41615e+06	1.0146
53	16	0	55.5	E	v3	54	16	0	56.5	E	v0	8.41621e+06	14.99	8.4162e+06	2.4113
53	16	0	55.5	E	v3	52	16	0	54.5	E	v0	8.74194e+06	14.99	8.74194e+06	1.0149
53	18	0	55.5	A2	v3	54	18	0	56.5	A1	v0	8.41632e+06	14.99	8.41632e+06	3.1199
53	18	0	55.5	A2	v3	52	18	0	54.5	A1	v0	8.74204e+06	14.99	8.74204e+06	0.4003
53	19	0	55.5	E	v3	52	19	0	54.5	E	v0	8.74209e+06	14.99	8.74209e+06	-1.0459
53	19	0	55.5	E	v3	54	19	0	56.5	E	v0	8.41638e+06	14.99	8.41638e+06	3.2574
53	21	0	55.5	A1	v3	52	21	0	54.5	A2	v0	8.74221e+06	14.99	8.74221e+06	-1.9739
53	21	0	55.5	A1	v3	54	21	0	56.5	A2	v0	8.41652e+06	14.99	8.41651e+06	8.8405
53	22	0	55.5	E	v3	54	22	0	56.5	E	v0	8.41659e+06	14.99	8.41658e+06	4.9861
53	24	0	55.5	A2	v3	52	24	0	54.5	A1	v0	8.74239e+06	14.99	8.7424e+06	-3.6459
53	24	0	55.5	A2	v3	54	24	0	56.5	A1	v0	8.41674e+06	14.99	8.41673e+06	13.6008
53	25	0	55.5	E	v3	52	25	0	54.5	E	v0	8.74245e+06	14.99	8.74246e+06	-8.3608
53	27	0	55.5	A1	v3	54	27	0	56.5	A2	v0	8.41696e+06	14.99	8.41696e+06	2.2562
53	27	0	55.5	A1	v3	52	27	0	54.5	A2	v0	8.7426e+06	14.99	8.7426e+06	-0.5725
53	30	0	55.5	A2	v3	54	30	0	56.5	A1	v0	8.4172e+06	14.99	8.41719e+06	6.0923
53	30	0	55.5	A2	v3	52	30	0	54.5	A1	v0	8.74279e+06	14.99	8.7428e+06	-15.4299
53	-29	0	55.5	E	v3	54	29	0	56.5	E	v0	8.41711e+06	14.99	8.41711e+06	0.6595
53	-23	0	55.5	E	v3	54	23	0	56.5	E	v0	8.41666e+06	14.99	8.41665e+06	7.7115
53	-20	0	55.5	E	v3	54	20	0	56.5	E	v0	8.41645e+06	14.99	8.41645e+06	1.7198
53	-20	0	55.5	E	v3	52	20	0	54.5	E	v0	8.74215e+06	14.99	8.74215e+06	-1.3846
53	-17	0	55.5	E	v3	54	17	0	56.5	E	v0	8.41627e+06	14.99	8.41626e+06	8.6732
53	-17	0	55.5	E	v3	52	17	0	54.5	E	v0	8.74198e+06	14.99	8.74199e+06	-3.4702
53	-14	0	55.5	E	v3	52	14	0	54.5	E	v0	8.74184e+06	14.99	8.74184e+06	-1.3459
53	-14	0	55.5	E	v3	54	14	0	56.5	E	v0	8.4161e+06	14.99	8.4161e+06	4.3845
53	-11	0	55.5	E	v3	54	11	0	56.5	E	v0	8.41597e+06	14.99	8.41597e+06	3.5624
53	-11	0	55.5	E	v3	52	11	0	54.5	E	v0	8.74173e+06	14.99	8.74172e+06	2.9078
53	-8	0	55.5	E	v3	54	8	0	56.5	E	v0	8.41586e+06	14.99	8.41586e+06	-7.1922
54	0	0	56.5	A1	v3	55	0	0	57.5	A2	v0	8.41261e+06	14.99	8.4126e+06	5.8485
54	0	0	56.5	A1	v3	53	0	0	55.5	A2	v0	8.74446e+06	14.99	8.74446e+06	2.0235
54	6	0	56.5	A1	v3	53	6	0	55.5	A2	v0	8.74452e+06	14.99	8.74452e+06	-1.7273
54	9	0	56.5	A2	v3	53	9	0	55.5	A1	v0	8.74459e+06	14.99	8.7446e+06	-5.1189
54	9	0	56.5	A2	v3	55	9	0	57.5	A1	v0	8.41275e+06	14.99	8.41275e+06	1.0218
54	10	0	56.5	E	v3	55	10	0	57.5	E	v0	8.41279e+06	14.99	8.41279e+06	1.9546
54	10	0	56.5	E	v3	53	10	0	55.5	E	v0	8.74463e+06	14.99	8.74463e+06	0.1599
54	12	0	56.5	A1	v3	53	12	0	55.5	A2	v0	8.7447e+06	14.99	8.7447e+06	1.4435
54	12	0	56.5	A1	v3	55	12	0	57.5	A2	v0	8.41287e+06	14.99	8.41287e+06	1.1573
54	13	0	56.5	E	v3	55	13	0	57.5	E	v0	8.41291e+06	14.99	8.41291e+06	-3.449
54	13	0	56.5	E	v3	53	13	0	55.5	E	v0	8.74474e+06	14.99	8.74474e+06	2.0668
54	15	0	56.5	A2	v3	55	15	0	57.5	A1	v0	8.41301e+06	14.99	8.41301e+06	2.3637
54	15	0	56.5	A2	v3	53	15	0	55.5	A1	v0	8.74483e+06	14.99	8.74483e+06	2.1343
54	16	0	56.5	E	v3	53	16	0	55.5	E	v0	8.74488e+06	14.99	8.74488e+06	-1.2541
54	16	0	56.5	E	v3	55	16	0	57.5	E	v0	8.41307e+06	14.99	8.41307e+06	1.556
54	18	0	56.5	A1	v3	53	18	0	55.5	A2	v0	8.74498e+06	14.99	8.74498e+06	-3.007
54	18	0	56.5	A1	v3	55	18	0	57.5	A2	v0	8.41319e+06	14.99	8.41319e+06	4.3804
54	19	0	56.5	E	v3	53	19	0	55.5	E	v0	8.74504e+06	14.99	8.74504e+06	-2.6528
54	19	0	56.5	E	v3	55	19	0	57.5	E	v0	8.41325e+06	14.99	8.41325e+06	-0.4637
54	21	0	56.5	A2	v3	55	21	0	57.5	A1	v0	8.4134e+06	14.99	8.41339e+06	9.735
54	21	0	56.5	A2	v3	53	21	0	55.5	A1	v0	8.74516e+06	14.99	8.74516e+06	-3.6577
54	22	0	56.5	E	v3	55	22	0	57.5	E	v0	8.41347e+06	14.99	8.41346e+06	9.1717
54	24	0	56.5	A1	v3	53	24	0	55.5	A2	v0	8.74535e+06	14.99	8.74536e+06	-2.4331
54	24	0	56.5	A1	v3	55	24	0	57.5	A2	v0	8.41361e+06	14.99	8.41361e+06	5.3184
54	25	0	56.5	E	v3	53	25	0	55.5	E	v0	8.74542e+06	14.99	8.74542e+06	-5.2857
54	27	0	56.5	A2	v3	53	27	0	55.5	A1	v0	8.74556e+06	14.99	8.74556e+06	-1.7683
54	27	0	56.5	A2	v3	55	27	0	57.5	A1	v0	8.41385e+06	14.99	8.41385e+06	5.7831
54	28	0	56.5	E	v3	53	28	0	55.5	E	v0	8.74563e+06	14.99	8.74564e+06	-7.2161
54	28	0	56.5	E	v3	55	28	0	57.5	E	v0	8.41393e+06	14.99	8.41393e+06	2.9765
54	30	0	56.5	A1	v3	55	30	0	57.5	A2	v0	8.4141e+06	14.99	8.4141e+06	-0.0949
54	30	0	56.5	A1	v3	53	30	0	55.5	A2	v0	8.74577e+06	14.99	8.74578e+06	-11.3873
54	-29	0	56.5	E	v3	55	29	0	57.5	E	v0	8.41401e+06	14.99	8.41401e+06	-4.0777
54	-26	0	56.5	E	v3	55	26	0	57.5	E	v0	8.41377e+06	14.99	8.41376e+06	10.0684
54	-26	0	56.5	E	v3	53	26	0	55.5	E	v0	8.74549e+06	14.99	8.74549e+06	-5.8391
54	-23	0	56.5	E	v3	53	23	0	55.5	E	v0	8.74528e+06	14.99	8.74529e+06	-11.5791
54	-23	0	56.5	E	v3	55	23	0	57.5	E	v0	8.41354e+06	14.99	8.41353e+06	8.1408
54	-20	0	56.5	E	v3	53	20	0	55.5	E	v0	8.7451e+06	14.99	8.7451e+06	-4.014
54	-20	0	56.5	E	v3	55	20	0	57.5	E	v0	8.41332e+06	14.99	8.41332e+06	3.9742
54	-17	0	56.5	E	v3	55	17	0	57.5	E	v0	8.41313e+06	14.99	8.41313e+06	2.1936
54	-17	0	56.5	E	v3	53	17	0	55.5	E	v0	8.74493e+06	14.99	8.74493e+06	2.5936
54	-14	0	56.5	E	v3	55	14	0	57.5	E	v0	8.41296e+06	14.99	8.41296e+06	4.5217
54	-14	0	56.5	E	v3	53	14	0	55.5	E	v0	8.74478e+06	14.99	8.74478e+06	-3.5252
54	-11	0	56.5	E	v3	53	11	0	55.5	E	v0	8.74467e+06	14.99	8.74466e+06	2.628
54	-11	0	56.5	E	v3	55	11	0	57.5	E	v0	8.41283e+06	14.99	8.41282e+06	2.6801
54	-8	0	56.5	E	v3	55	8	0	57.5	E	v0	8.41271e+06	14.99	8.41272e+06	-5.5657
54	-8	0	56.5	E	v3	53	8	0	55.5	E	v0	8.74456e+06	14.99	8.74457e+06	-11.1613
55	0	0	57.5	A2	v3	56	0	0	58.5	A1	v0	8.40945e+06	14.99	8.40945e+06	2.9023
55	0	0	57.5	A2	v3	54	0	0	56.5	A1	v0	8.74739e+06	14.99	8.74739e+06	1.5972
55	6	0	57.5	A2	v3	54	6	0	56.5	A1	v0	8.74745e+06	14.99	8.74745e+06	-3.1326
55	6	0	57.5	A2	v3	56	6	0	58.5	A1	v0	8.40951e+06	14.99	8.40952e+06	-10.604
55	9	0	57.5	A1	v3	54	9	0	56.5	A2	v0	8.74753e+06	14.99	8.74753e+06	-5.2286
55	9	0	57.5	A1	v3	56	9	0	58.5	A2	v0	8.4096e+06	14.99	8.4096e+06	-2.0109
55	10	0	57.5	E	v3	54	10	0	56.5	E	v0	8.74756e+06	14.99	8.74756e+06	-3.8029
55	10	0	57.5	E	v3	56	10	0	58.5	E	v0	8.40964e+06	14.99	8.40964e+06	2.7688
55	12	0	57.5	A2	v3	54	12	0	56.5	A1	v0	8.74764e+06	14.99	8.74764e+06	-0.3256
55	12	0	57.5	A2	v3	56	12	0	58.5	A1	v0	8.40972e+06	14.99	8.40972e+06	0.0489
55	13	0	57.5	E	v3	54	13	0	56.5	E	v0	8.74768e+06	14.99	8.74768e+06	0.344
55	13	0	57.5	E	v3	56	13	0	58.5	E	v0	8.40977e+06	14.99	8.40977e+06	2.2598
55	15	0	57.5	A1	v3	56	15	0	58.5	A2	v0	8.40987e+06	14.99	8.40987e+06	0.0762
55	15	0	57.5	A1	v3	54	15	0	56.5	A2	v0	8.74777e+06	14.99	8.74777e+06	-0.4111
55	16	0	57.5	E	v3	54	16	0	56.5	E	v0	8.74782e+06	14.99	8.74782e+06	-4.9744
55	16	0	57.5	E	v3	56	16	0	58.5	E	v0	8.40993e+06	14.99	8.40993e+06	4.5347
55	18	0	57.5	A2	v3	56	18	0	58.5	A1	v0	8.41006e+06	14.99	8.41005e+06	5.224
55	18	0	57.5	A2	v3	54	18	0	56.5	A1	v0	8.74793e+06	14.99	8.74793e+06	1.3688
55	19	0	57.5	E	v3	56	19	0	58.5	E	v0	8.41013e+06	14.99	8.41012e+06	9.7585
55	19	0	57.5	E	v3	54	19	0	56.5	E	v0	8.74799e+06	14.99	8.74799e+06	-1.3055
55	21	0	57.5	A1	v3	56	21	0	58.5	A2	v0	8.41027e+06	14.99	8.41026e+06	7.4195
55	21	0	57.5	A1	v3	54	21	0	56.5	A2	v0	8.74811e+06	14.99	8.74811e+06	-0.0603
55	22	0	57.5	E	v3	54	22	0	56.5	E	v0	8.74817e+06	14.99	8.74818e+06	-6.6614
55	22	0	57.5	E	v3	56	22	0	58.5	E	v0	8.41034e+06	14.99	8.41033e+06	7.7129
55	24	0	57.5	A2	v3	56	24	0	58.5	A1	v0	8.4105e+06	14.99	8.41049e+06	8.1021
55	24	0	57.5	A2	v3	54	24	0	56.5	A1	v0	8.74831e+06	14.99	8.74831e+06	-1.7594
55	25	0	57.5	E	v3	54	25	0	56.5	E	v0	8.74838e+06	14.99	8.74839e+06	-2.1964
55	27	0	57.5	A1	v3	54	27	0	56.5	A2	v0	8.74853e+06	14.99	8.74853e+06	-3.3499
55	27	0	57.5	A1	v3	56	27	0	58.5	A2	v0	8.41074e+06	14.99	8.41074e+06	8.8489
55	28	0	57.5	E	v3	54	28	0	56.5	E	v0	8.7486e+06	14.99	8.74861e+06	-5.41
55	28	0	57.5	E	v3	56	28	0	58.5	E	v0	8.41083e+06	14.99	8.41082e+06	5.8589
55	30	0	57.5	A1	v3	54	30	0	56.5	A2	v0	8.74875e+06	14.99	8.74876e+06	-9.4006
55	30	0	57.5	A2	v3	56	30	0	58.5	A1	v0	8.411e+06	14.99	8.411e+06	2.092
55	-29	0	57.5	E	v3	54	29	0	56.5	E	v0	8.74867e+06	14.99	8.74868e+06	-7.0217
55	-29	0	57.5	E	v3	56	29	0	58.5	E	v0	8.41091e+06	14.99	8.41091e+06	2.313
55	-26	0	57.5	E	v3	54	26	0	56.5	E	v0	8.74845e+06	14.99	8.74846e+06	-3.7984
55	-23	0	57.5	E	v3	54	23	0	56.5	E	v0	8.74824e+06	14.99	8.74825e+06	-9.882
55	-23	0	57.5	E	v3	56	23	0	58.5	E	v0	8.41042e+06	14.99	8.41041e+06	7.6846
55	-20	0	57.5	E	v3	56	20	0	58.5	E	v0	8.41019e+06	14.99	8.41019e+06	2.7523
55	-20	0	57.5	E	v3	54	20	0	56.5	E	v0	8.74805e+06	14.99	8.74805e+06	2.8715
55	-17	0	57.5	E	v3	54	17	0	56.5	E	v0	8.74787e+06	14.99	8.74787e+06	-0.9169
55	-17	0	57.5	E	v3	56	17	0	58.5	E	v0	8.40999e+06	14.99	8.40999e+06	1.3207
55	-14	0	57.5	E	v3	56	14	0	58.5	E	v0	8.40982e+06	14.99	8.40982e+06	3.143
55	-14	0	57.5	E	v3	54	14	0	56.5	E	v0	8.74772e+06	14.99	8.74772e+06	-2.0081
55	-11	0	57.5	E	v3	56	11	0	58.5	E	v0	8.40968e+06	14.99	8.40968e+06	3.0372
55	-11	0	57.5	E	v3	54	11	0	56.5	E	v0	8.7476e+06	14.99	8.7476e+06	0.711
56	0	0	58.5	A1	v3	57	0	0	59.5	A2	v0	8.4063e+06	14.99	8.4063e+06	6.3852
56	0	0	58.5	A1	v3	55	0	0	57.5	A2	v0	8.75032e+06	14.99	8.75032e+06	1.1426
56	6	0	58.5	A1	v3	57	6	0	59.5	A2	v0	8.40636e+06	14.99	8.40637e+06	-8.6053
56	6	0	58.5	A1	v3	55	6	0	57.5	A2	v0	8.75038e+06	14.99	8.75038e+06	-3.9952
56	9	0	58.5	A2	v3	57	9	0	59.5	A1	v0	8.40645e+06	59.958	8.40645e+06	-1.9718
56	9	0	58.5	A2	v3	55	9	0	57.5	A1	v0	8.75046e+06	14.99	8.75046e+06	-2.7336
56	10	0	58.5	E	v3	57	10	0	59.5	E	v0	8.4065e+06	14.99	8.40649e+06	3.9425
56	10	0	58.5	E	v3	55	10	0	57.5	E	v0	8.7505e+06	14.99	8.7505e+06	0.5197
56	12	0	58.5	A1	v3	57	12	0	59.5	A2	v0	8.40658e+06	14.99	8.40658e+06	-1.0328
56	12	0	58.5	A1	v3	55	12	0	57.5	A2	v0	8.75057e+06	14.99	8.75057e+06	-0.7407
56	13	0	58.5	E	v3	57	13	0	59.5	E	v0	8.40663e+06	14.99	8.40662e+06	2.2803
56	13	0	58.5	E	v3	55	13	0	57.5	E	v0	8.75062e+06	14.99	8.75061e+06	2.6527
56	15	0	58.5	A2	v3	55	15	0	57.5	A1	v0	8.75071e+06	14.99	8.75071e+06	-2.5693
56	15	0	58.5	A2	v3	57	15	0	59.5	A1	v0	8.40674e+06	14.99	8.40673e+06	4.049
56	16	0	58.5	E	v3	55	16	0	57.5	E	v0	8.75076e+06	14.99	8.75076e+06	-3.2373
56	16	0	58.5	E	v3	57	16	0	59.5	E	v0	8.40678e+06	14.99	8.40679e+06	-5.1373
56	18	0	58.5	A1	v3	55	18	0	57.5	A2	v0	8.75087e+06	14.99	8.75087e+06	-1.4475
56	18	0	58.5	A1	v3	57	18	0	59.5	A2	v0	8.40692e+06	14.99	8.40692e+06	3.2562
56	19	0	58.5	E	v3	57	19	0	59.5	E	v0	8.40699e+06	14.99	8.40698e+06	8.1461
56	19	0	58.5	E	v3	55	19	0	57.5	E	v0	8.75093e+06	14.99	8.75093e+06	0.9118
56	21	0	58.5	A2	v3	57	21	0	59.5	A1	v0	8.40714e+06	14.99	8.40713e+06	6.9944
56	21	0	58.5	A2	v3	55	21	0	57.5	A1	v0	8.75106e+06	14.99	8.75106e+06	-3.4584
56	22	0	58.5	E	v3	57	22	0	59.5	E	v0	8.40721e+06	14.99	8.40721e+06	6.3103
56	22	0	58.5	E	v3	55	22	0	57.5	E	v0	8.75113e+06	14.99	8.75113e+06	-0.3335
56	24	0	58.5	A1	v3	55	24	0	57.5	A2	v0	8.75127e+06	14.99	8.75127e+06	-4.0069
56	24	0	58.5	A1	v3	57	24	0	59.5	A2	v0	8.40737e+06	14.99	8.40737e+06	5.7674
56	25	0	58.5	E	v3	55	25	0	57.5	E	v0	8.75134e+06	14.99	8.75134e+06	-0.5749
56	27	0	58.5	A2	v3	55	27	0	57.5	A1	v0	8.75149e+06	14.99	8.7515e+06	-6.1984
56	27	0	58.5	A2	v3	57	27	0	59.5	A1	v0	8.40763e+06	14.99	8.40762e+06	3.6641
56	28	0	58.5	E	v3	57	28	0	59.5	E	v0	8.40771e+06	14.99	8.40771e+06	-6.7539
56	28	0	58.5	E	v3	55	28	0	57.5	E	v0	8.75157e+06	14.99	8.75157e+06	-7.9224
56	30	0	58.5	A1	v3	57	30	0	59.5	A2	v0	8.40789e+06	14.99	8.40789e+06	-2.9297
56	30	0	58.5	A1	v3	55	30	0	57.5	A2	v0	8.75172e+06	14.99	8.75173e+06	-16.3449
56	-29	0	58.5	E	v3	57	29	0	59.5	E	v0	8.40781e+06	14.99	8.4078e+06	3.9486
56	-29	0	58.5	E	v3	55	29	0	57.5	E	v0	8.75164e+06	14.99	8.75165e+06	-15.6921
56	-26	0	58.5	E	v3	55	26	0	57.5	E	v0	8.75141e+06	14.99	8.75142e+06	-7.4707
56	-23	0	58.5	E	v3	55	23	0	57.5	E	v0	8.75119e+06	14.99	8.7512e+06	-5.9663
56	-23	0	58.5	E	v3	57	23	0	59.5	E	v0	8.40729e+06	14.99	8.40728e+06	5.4478
56	-20	0	58.5	E	v3	55	20	0	57.5	E	v0	8.75101e+06	14.99	8.751e+06	15.9889
56	-20	0	58.5	E	v3	55	20	0	57.5	E	v0	8.75099e+06	14.99	8.751e+06	-1.6988
56	-20	0	58.5	E	v3	57	20	0	59.5	E	v0	8.40706e+06	14.99	8.40705e+06	8.551
56	-17	0	58.5	E	v3	57	17	0	59.5	E	v0	8.40685e+06	14.99	8.40685e+06	1.8614
56	-17	0	58.5	E	v3	55	17	0	57.5	E	v0	8.75082e+06	14.99	8.75082e+06	-0.1974
56	-14	0	58.5	E	v3	55	14	0	57.5	E	v0	8.75066e+06	14.99	8.75066e+06	-0.6792
56	-14	0	58.5	E	v3	57	14	0	59.5	E	v0	8.40668e+06	14.99	8.40668e+06	2.9507
56	-11	0	58.5	E	v3	57	11	0	59.5	E	v0	8.40653e+06	14.99	8.40653e+06	2.2392
56	-11	0	58.5	E	v3	55	11	0	57.5	E	v0	8.75053e+06	14.99	8.75053e+06	2.5653
56	-8	0	58.5	E	v3	57	8	0	59.5	E	v0	8.40643e+06	59.958	8.40642e+06	5.4344
56	-8	0	58.5	E	v3	55	8	0	57.5	E	v0	8.75042e+06	14.99	8.75043e+06	-9.0404
57	0	0	59.5	A2	v3	58	0	0	60.5	A1	v0	8.40314e+06	14.99	8.40314e+06	2.8099
57	0	0	59.5	A2	v3	56	0	0	58.5	A1	v0	8.75325e+06	14.99	8.75325e+06	3.0699
57	6	0	59.5	A2	v3	58	6	0	60.5	A1	v0	8.40321e+06	14.99	8.40321e+06	-1.6993
57	6	0	59.5	A2	v3	58	6	0	60.5	A1	v0	8.40319e+06	14.99	8.40321e+06	-24.1837
57	9	0	59.5	A1	v3	58	9	0	60.5	A2	v0	8.4033e+06	14.99	8.4033e+06	-2.4548
57	9	0	59.5	A1	v3	56	9	0	58.5	A2	v0	8.75339e+06	14.99	8.75339e+06	-2.1183
57	10	0	59.5	E	v3	56	10	0	58.5	E	v0	8.75343e+06	14.99	8.75343e+06	1.7479
57	10	0	59.5	E	v3	58	10	0	60.5	E	v0	8.40334e+06	14.99	8.40334e+06	1.2824
57	12	0	59.5	A2	v3	58	12	0	60.5	A1	v0	8.40343e+06	14.99	8.40343e+06	0.6141
57	12	0	59.5	A2	v3	56	12	0	58.5	A1	v0	8.7535e+06	14.99	8.7535e+06	-0.6884
57	13	0	59.5	E	v3	58	13	0	60.5	E	v0	8.40348e+06	14.99	8.40348e+06	3.5114
57	13	0	59.5	E	v3	56	13	0	58.5	E	v0	8.75355e+06	14.99	8.75355e+06	-0.5875
57	15	0	59.5	A1	v3	58	15	0	60.5	A2	v0	8.40359e+06	14.99	8.40359e+06	1.3949
57	15	0	59.5	A1	v3	56	15	0	58.5	A2	v0	8.75364e+06	14.99	8.75365e+06	-1.6289
57	16	0	59.5	E	v3	58	16	0	60.5	E	v0	8.40364e+06	14.99	8.40365e+06	-4.372
57	16	0	59.5	E	v3	56	16	0	58.5	E	v0	8.7537e+06	14.99	8.7537e+06	-1.126
57	18	0	59.5	A2	v3	58	18	0	60.5	A1	v0	8.40378e+06	14.99	8.40378e+06	4.1775
57	18	0	59.5	A2	v3	56	18	0	58.5	A1	v0	8.75381e+06	14.99	8.75381e+06	-0.9493
57	19	0	59.5	E	v3	58	19	0	60.5	E	v0	8.40386e+06	14.99	8.40385e+06	7.2946
57	19	0	59.5	E	v3	56	19	0	58.5	E	v0	8.75388e+06	14.99	8.75388e+06	-0.4835
57	21	0	59.5	A1	v3	58	21	0	60.5	A2	v0	8.404e+06	14.99	8.404e+06	5.1668
57	21	0	59.5	A1	v3	56	21	0	58.5	A2	v0	8.75401e+06	14.99	8.75401e+06	-0.346
57	22	0	59.5	E	v3	56	22	0	58.5	E	v0	8.75407e+06	14.99	8.75408e+06	-5.8208
57	24	0	59.5	A2	v3	58	24	0	60.5	A1	v0	8.40425e+06	14.99	8.40424e+06	5.2148
57	24	0	59.5	A2	v3	56	24	0	58.5	A1	v0	8.75422e+06	14.99	8.75423e+06	-3.463
57	25	0	59.5	E	v3	56	25	0	58.5	E	v0	8.75429e+06	14.99	8.7543e+06	-7.8992
57	27	0	59.5	A1	v3	56	27	0	58.5	A2	v0	8.75445e+06	14.99	8.75446e+06	-10.2961
57	28	0	59.5	E	v3	56	28	0	58.5	E	v0	8.75453e+06	14.99	8.75454e+06	-10.5377
57	30	0	59.5	A2	v3	56	30	0	58.5	A1	v0	8.7547e+06	14.99	8.75471e+06	-8.217
57	-29	0	59.5	E	v3	56	29	0	58.5	E	v0	8.75459e+06	14.99	8.75462e+06	-36.2129
57	-26	0	59.5	E	v3	56	26	0	58.5	E	v0	8.75437e+06	14.99	8.75438e+06	-10.5433
57	-23	0	59.5	E	v3	56	23	0	58.5	E	v0	8.75415e+06	14.99	8.75415e+06	-2.814
57	-23	0	59.5	E	v3	58	23	0	60.5	E	v0	8.40416e+06	14.99	8.40416e+06	0.8359
57	-20	0	59.5	E	v3	56	20	0	58.5	E	v0	8.75394e+06	14.99	8.75394e+06	1.7762
57	-20	0	59.5	E	v3	58	20	0	60.5	E	v0	8.40393e+06	14.99	8.40392e+06	4.8863
57	-17	0	59.5	E	v3	56	17	0	58.5	E	v0	8.75376e+06	14.99	8.75376e+06	1.4682
57	-14	0	59.5	E	v3	56	14	0	58.5	E	v0	8.75359e+06	14.99	8.75359e+06	-3.7223
57	-14	0	59.5	E	v3	58	14	0	60.5	E	v0	8.40353e+06	14.99	8.40353e+06	0.9504
57	-11	0	59.5	E	v3	56	11	0	58.5	E	v0	8.75347e+06	14.99	8.75346e+06	2.2075
57	-11	0	59.5	E	v3	58	11	0	60.5	E	v0	8.40339e+06	14.99	8.40338e+06	1.7887
57	-8	0	59.5	E	v3	56	8	0	58.5	E	v0	8.75335e+06	14.99	8.75336e+06	-12.734
57	-8	0	59.5	E	v3	58	8	0	60.5	E	v0	8.40326e+06	14.99	8.40327e+06	-6.47
58	0	0	60.5	A1	v3	59	0	0	61.5	A2	v0	8.39999e+06	14.99	8.39998e+06	5.0714
58	0	0	60.5	A1	v3	57	0	0	59.5	A2	v0	8.75617e+06	14.99	8.75617e+06	2.8935
58	6	0	60.5	A1	v3	59	6	0	61.5	A2	v0	8.40004e+06	14.99	8.40006e+06	-16.8634
58	9	0	60.5	A2	v3	57	9	0	59.5	A1	v0	8.75631e+06	14.99	8.75632e+06	-4.27
58	9	0	60.5	A2	v3	59	9	0	61.5	A1	v0	8.40015e+06	14.99	8.40015e+06	-1.657
58	10	0	60.5	E	v3	59	10	0	61.5	E	v0	8.40019e+06	14.99	8.40019e+06	-0.1111
58	10	0	60.5	E	v3	57	10	0	59.5	E	v0	8.75635e+06	14.99	8.75635e+06	-1.9046
58	12	0	60.5	A1	v3	59	12	0	61.5	A2	v0	8.40028e+06	14.99	8.40028e+06	-2.2014
58	12	0	60.5	A1	v3	57	12	0	59.5	A2	v0	8.75643e+06	14.99	8.75643e+06	-0.4559
58	13	0	60.5	E	v3	59	13	0	61.5	E	v0	8.40033e+06	14.99	8.40033e+06	1.1607
58	13	0	60.5	E	v3	57	13	0	59.5	E	v0	8.75648e+06	14.99	8.75648e+06	0.5292
58	15	0	60.5	A2	v3	59	15	0	61.5	A1	v0	8.40045e+06	14.99	8.40044e+06	2.611
58	15	0	60.5	A2	v3	57	15	0	59.5	A1	v0	8.75658e+06	14.99	8.75658e+06	-0.2749
58	16	0	60.5	E	v3	59	16	0	61.5	E	v0	8.40051e+06	14.99	8.4005e+06	3.5372
58	16	0	60.5	E	v3	57	16	0	59.5	E	v0	8.75663e+06	14.99	8.75663e+06	-2.2241
58	18	0	60.5	A1	v3	59	18	0	61.5	A2	v0	8.40064e+06	14.99	8.40064e+06	3.1958
58	18	0	60.5	A1	v3	57	18	0	59.5	A2	v0	8.75675e+06	14.99	8.75675e+06	-1.9192
58	19	0	60.5	E	v3	59	19	0	61.5	E	v0	8.40072e+06	14.99	8.40071e+06	3.9109
58	19	0	60.5	E	v3	57	19	0	59.5	E	v0	8.75682e+06	14.99	8.75682e+06	-1.8796
58	21	0	60.5	A2	v3	59	21	0	61.5	A1	v0	8.40087e+06	14.99	8.40087e+06	6.1386
58	21	0	60.5	A2	v3	57	21	0	59.5	A1	v0	8.75695e+06	14.99	8.75695e+06	-0.3016
58	22	0	60.5	E	v3	57	22	0	59.5	E	v0	8.75703e+06	14.99	8.75703e+06	1.4753
58	22	0	60.5	E	v3	59	22	0	61.5	E	v0	8.40095e+06	14.99	8.40095e+06	3.093
58	24	0	60.5	A1	v3	59	24	0	61.5	A2	v0	8.40112e+06	14.99	8.40112e+06	1.653
58	24	0	60.5	A1	v3	57	24	0	59.5	A2	v0	8.75718e+06	14.99	8.75718e+06	-2.5098
58	25	0	60.5	E	v3	59	25	0	61.5	E	v0	8.40122e+06	14.99	8.40121e+06	7.7636
58	25	0	60.5	E	v3	57	25	0	59.5	E	v0	8.75726e+06	14.99	8.75726e+06	-1.0684
58	28	0	60.5	E	v3	57	28	0	59.5	E	v0	8.75749e+06	14.99	8.75751e+06	-20.7321
58	30	0	60.5	A1	v3	59	30	0	61.5	A2	v0	8.40168e+06	14.99	8.40169e+06	-5.7846
58	30	0	60.5	A1	v3	57	30	0	59.5	A2	v0	8.75767e+06	14.99	8.75768e+06	-8.9731
58	-29	0	60.5	E	v3	57	29	0	59.5	E	v0	8.75757e+06	14.99	8.75759e+06	-21.7974
58	-29	0	60.5	E	v3	59	29	0	61.5	E	v0	8.40159e+06	14.99	8.40159e+06	3.4733
58	-26	0	60.5	E	v3	57	26	0	59.5	E	v0	8.75734e+06	14.99	8.75734e+06	2.2908
58	-23	0	60.5	E	v3	57	23	0	59.5	E	v0	8.7571e+06	14.99	8.7571e+06	1.6893
58	-23	0	60.5	E	v3	59	23	0	61.5	E	v0	8.40104e+06	14.99	8.40103e+06	4.047
58	-20	0	60.5	E	v3	59	20	0	61.5	E	v0	8.40079e+06	14.99	8.40079e+06	6.7524
58	-20	0	60.5	E	v3	57	20	0	59.5	E	v0	8.75689e+06	14.99	8.75688e+06	1.3198
58	-17	0	60.5	E	v3	59	17	0	61.5	E	v0	8.40058e+06	14.99	8.40057e+06	5.1018
58	-17	0	60.5	E	v3	57	17	0	59.5	E	v0	8.75669e+06	14.99	8.75669e+06	-4.0006
58	-14	0	60.5	E	v3	59	14	0	61.5	E	v0	8.40039e+06	14.99	8.40039e+06	4.9411
58	-14	0	60.5	E	v3	57	14	0	59.5	E	v0	8.75653e+06	14.99	8.75653e+06	0.8671
58	-11	0	60.5	E	v3	57	11	0	59.5	E	v0	8.75639e+06	14.99	8.75639e+06	-0.6495
58	-11	0	60.5	E	v3	59	11	0	61.5	E	v0	8.40023e+06	14.99	8.40023e+06	0.1908
58	-8	0	60.5	E	v3	59	8	0	61.5	E	v0	8.40012e+06	14.99	8.40012e+06	-0.8924
58	-8	0	60.5	E	v3	57	8	0	59.5	E	v0	8.75628e+06	14.99	8.75629e+06	-11.0867
59	0	0	61.5	A2	v3	60	0	0	62.5	A1	v0	8.39683e+06	14.99	8.39683e+06	5.9785
59	0	0	61.5	A2	v3	58	0	0	60.5	A1	v0	8.7591e+06	59.958	8.75909e+06	7.5209
59	6	0	61.5	A2	v3	58	6	0	60.5	A1	v0	8.7591e+06	59.958	8.75916e+06	-61.0684
59	6	0	61.5	A2	v3	60	6	0	62.5	A1	v0	8.39689e+06	14.99	8.3969e+06	-10.024
59	9	0	61.5	A1	v3	60	9	0	62.5	A2	v0	8.397e+06	14.99	8.397e+06	-0.7736
59	9	0	61.5	A1	v3	58	9	0	60.5	A2	v0	8.75924e+06	14.99	8.75924e+06	-1.082
59	10	0	61.5	E	v3	60	10	0	62.5	E	v0	8.39704e+06	14.99	8.39704e+06	2.1643
59	10	0	61.5	E	v3	58	10	0	60.5	E	v0	8.75928e+06	14.99	8.75928e+06	0.6669
59	12	0	61.5	A2	v3	60	12	0	62.5	A1	v0	8.39713e+06	14.99	8.39713e+06	0.1182
59	12	0	61.5	A2	v3	58	12	0	60.5	A1	v0	8.75936e+06	14.99	8.75936e+06	-1.5294
59	13	0	61.5	E	v3	58	13	0	60.5	E	v0	8.7594e+06	14.99	8.75941e+06	-3.5775
59	13	0	61.5	E	v3	60	13	0	62.5	E	v0	8.39718e+06	14.99	8.39718e+06	-0.2709
59	15	0	61.5	A1	v3	60	15	0	62.5	A2	v0	8.3973e+06	14.99	8.3973e+06	3.2047
59	15	0	61.5	A1	v3	58	15	0	60.5	A2	v0	8.75951e+06	14.99	8.75951e+06	-2.6909
59	16	0	61.5	E	v3	58	16	0	60.5	E	v0	8.75957e+06	14.99	8.75957e+06	-1.4217
59	16	0	61.5	E	v3	60	16	0	62.5	E	v0	8.39736e+06	14.99	8.39736e+06	2.1062
59	18	0	61.5	A2	v3	58	18	0	60.5	A1	v0	8.75969e+06	14.99	8.75969e+06	-0.4458
59	18	0	61.5	A2	v3	60	18	0	62.5	A1	v0	8.3975e+06	14.99	8.3975e+06	5.1121
59	19	0	61.5	E	v3	60	19	0	62.5	E	v0	8.39758e+06	14.99	8.39757e+06	6.6937
59	19	0	61.5	E	v3	58	19	0	60.5	E	v0	8.75975e+06	14.99	8.75976e+06	-1.7628
59	21	0	61.5	A1	v3	60	21	0	62.5	A2	v0	8.39774e+06	14.99	8.39773e+06	6.617
59	21	0	61.5	A1	v3	58	21	0	60.5	A2	v0	8.7599e+06	14.99	8.7599e+06	3.2854
59	22	0	61.5	E	v3	58	22	0	60.5	E	v0	8.75997e+06	14.99	8.75997e+06	-2.4134
59	22	0	61.5	E	v3	60	22	0	62.5	E	v0	8.39782e+06	14.99	8.39782e+06	6.9848
59	24	0	61.5	A2	v3	58	24	0	60.5	A1	v0	8.76013e+06	14.99	8.76013e+06	-2.3301
59	24	0	61.5	A2	v3	60	24	0	62.5	A1	v0	8.398e+06	14.99	8.39799e+06	3.7817
59	25	0	61.5	E	v3	58	25	0	60.5	E	v0	8.76021e+06	14.99	8.76021e+06	-5.848
59	25	0	61.5	E	v3	60	25	0	62.5	E	v0	8.39809e+06	14.99	8.39809e+06	2.3031
59	27	0	61.5	A1	v3	58	27	0	60.5	A2	v0	8.76038e+06	14.99	8.76038e+06	-2.681
59	27	0	61.5	A1	v3	60	27	0	62.5	A2	v0	8.39828e+06	14.99	8.39828e+06	2.2235
59	28	0	61.5	E	v3	58	28	0	60.5	E	v0	8.76046e+06	14.99	8.76047e+06	-6.1098
59	30	0	61.5	A2	v3	60	30	0	62.5	A1	v0	8.39859e+06	14.99	8.39858e+06	2.3805
59	30	0	61.5	A2	v3	58	30	0	60.5	A1	v0	8.76064e+06	14.99	8.76065e+06	-11.7179
59	-29	0	61.5	E	v3	60	29	0	62.5	E	v0	8.39847e+06	14.99	8.39848e+06	-6.4197
59	-29	0	61.5	E	v3	58	29	0	60.5	E	v0	8.76055e+06	14.99	8.76056e+06	-7.204
59	-26	0	61.5	E	v3	58	26	0	60.5	E	v0	8.76031e+06	14.99	8.7603e+06	12.7616
59	-23	0	61.5	E	v3	58	23	0	60.5	E	v0	8.76005e+06	14.99	8.76005e+06	-3.5326
59	-23	0	61.5	E	v3	60	23	0	62.5	E	v0	8.39791e+06	14.99	8.3979e+06	5.1934
59	-20	0	61.5	E	v3	58	20	0	60.5	E	v0	8.75983e+06	14.99	8.75983e+06	6.8396
59	-20	0	61.5	E	v3	60	20	0	62.5	E	v0	8.39766e+06	14.99	8.39765e+06	6.9593
59	-17	0	61.5	E	v3	58	17	0	60.5	E	v0	8.75963e+06	14.99	8.75963e+06	0.7977
59	-17	0	61.5	E	v3	60	17	0	62.5	E	v0	8.39743e+06	14.99	8.39743e+06	4.213
59	-14	0	61.5	E	v3	60	14	0	62.5	E	v0	8.39724e+06	14.99	8.39724e+06	3.2351
59	-14	0	61.5	E	v3	58	14	0	60.5	E	v0	8.75946e+06	14.99	8.75946e+06	-0.0885
59	-11	0	61.5	E	v3	60	11	0	62.5	E	v0	8.39708e+06	14.99	8.39708e+06	-3.7496
59	-11	0	61.5	E	v3	58	11	0	60.5	E	v0	8.75932e+06	14.99	8.75932e+06	0.3025
59	-8	0	61.5	E	v3	60	8	0	62.5	E	v0	8.39696e+06	14.99	8.39696e+06	-1.5125
59	-8	0	61.5	E	v3	58	8	0	60.5	E	v0	8.75921e+06	14.99	8.75921e+06	-1.0883
60	0	0	62.5	A1	v3	61	0	0	63.5	A2	v0	8.39367e+06	14.99	8.39366e+06	2.5373
60	0	0	62.5	A1	v3	59	0	0	61.5	A2	v0	8.76201e+06	14.99	8.76201e+06	6.171
60	6	0	62.5	A1	v3	61	6	0	63.5	A2	v0	8.39373e+06	14.99	8.39374e+06	-12.0559
60	6	0	62.5	A1	v3	59	6	0	61.5	A2	v0	8.76207e+06	14.99	8.76208e+06	-11.9742
60	9	0	62.5	A2	v3	61	9	0	63.5	A1	v0	8.39384e+06	14.99	8.39384e+06	-0.1005
60	9	0	62.5	A2	v3	59	9	0	61.5	A1	v0	8.76216e+06	14.99	8.76217e+06	-2.1353
60	10	0	62.5	E	v3	59	10	0	61.5	E	v0	8.7622e+06	14.99	8.7622e+06	2.28
60	10	0	62.5	E	v3	61	10	0	63.5	E	v0	8.39388e+06	14.99	8.39388e+06	-0.2813
60	12	0	62.5	A1	v3	61	12	0	63.5	A2	v0	8.39398e+06	14.99	8.39398e+06	1.5814
60	12	0	62.5	A1	v3	59	12	0	61.5	A2	v0	8.76229e+06	14.99	8.76229e+06	0.0015
60	13	0	62.5	E	v3	59	13	0	61.5	E	v0	8.76234e+06	14.99	8.76233e+06	2.9945
60	13	0	62.5	E	v3	61	13	0	63.5	E	v0	8.39403e+06	14.99	8.39403e+06	-1.6781
60	15	0	62.5	A2	v3	61	15	0	63.5	A1	v0	8.39415e+06	14.99	8.39415e+06	1.0821
60	15	0	62.5	A2	v3	59	15	0	61.5	A1	v0	8.76244e+06	14.99	8.76244e+06	-1.3687
60	16	0	62.5	E	v3	61	16	0	63.5	E	v0	8.39422e+06	14.99	8.39421e+06	3.9308
60	16	0	62.5	E	v3	59	16	0	61.5	E	v0	8.76249e+06	14.99	8.7625e+06	-6.2
60	18	0	62.5	A1	v3	59	18	0	61.5	A2	v0	8.76263e+06	14.99	8.76262e+06	0.1876
60	18	0	62.5	A1	v3	61	18	0	63.5	A2	v0	8.39436e+06	14.99	8.39436e+06	5.1348
60	19	0	62.5	E	v3	59	19	0	61.5	E	v0	8.76269e+06	14.99	8.76269e+06	-1.0182
60	19	0	62.5	E	v3	61	19	0	63.5	E	v0	8.39444e+06	14.99	8.39443e+06	5.755
60	21	0	62.5	A2	v3	61	21	0	63.5	A1	v0	8.3946e+06	14.99	8.3946e+06	2.1107
60	21	0	62.5	A2	v3	59	21	0	61.5	A1	v0	8.76284e+06	14.99	8.76284e+06	-1.8612
60	22	0	62.5	E	v3	59	22	0	61.5	E	v0	8.76291e+06	14.99	8.76292e+06	-2.4816
60	24	0	62.5	A1	v3	61	24	0	63.5	A2	v0	8.39487e+06	14.99	8.39486e+06	3.5125
60	24	0	62.5	A1	v3	59	24	0	61.5	A2	v0	8.76307e+06	14.99	8.76308e+06	-3.5072
60	25	0	62.5	E	v3	61	25	0	63.5	E	v0	8.39497e+06	14.99	8.39496e+06	10.5919
60	25	0	62.5	E	v3	59	25	0	61.5	E	v0	8.76317e+06	14.99	8.76316e+06	2.9614
60	27	0	62.5	A2	v3	61	27	0	63.5	A1	v0	8.39516e+06	14.99	8.39516e+06	-0.5261
60	27	0	62.5	A2	v3	59	27	0	61.5	A1	v0	8.76333e+06	14.99	8.76334e+06	-4.4231
60	28	0	62.5	E	v3	59	28	0	61.5	E	v0	8.76342e+06	14.99	8.76343e+06	-9.8227
60	28	0	62.5	E	v3	61	28	0	63.5	E	v0	8.39527e+06	14.99	8.39527e+06	3.5205
60	30	0	62.5	A1	v3	59	30	0	61.5	A2	v0	8.7636e+06	14.99	8.76362e+06	-17.313
60	-29	0	62.5	E	v3	61	29	0	63.5	E	v0	8.39537e+06	14.99	8.39537e+06	1.7489
60	-26	0	62.5	E	v3	59	26	0	61.5	E	v0	8.76325e+06	14.99	8.76325e+06	4.9972
60	-23	0	62.5	E	v3	59	23	0	61.5	E	v0	8.76299e+06	14.99	8.763e+06	-2.2754
60	-23	0	62.5	E	v3	61	23	0	63.5	E	v0	8.39478e+06	14.99	8.39477e+06	3.3814
60	-20	0	62.5	E	v3	59	20	0	61.5	E	v0	8.76277e+06	14.99	8.76276e+06	1.2624
60	-20	0	62.5	E	v3	61	20	0	63.5	E	v0	8.39452e+06	14.99	8.39451e+06	4.6127
60	-17	0	62.5	E	v3	61	17	0	63.5	E	v0	8.39428e+06	14.99	8.39428e+06	1.7576
60	-17	0	62.5	E	v3	59	17	0	61.5	E	v0	8.76256e+06	14.99	8.76256e+06	-0.0117
60	-14	0	62.5	E	v3	59	14	0	61.5	E	v0	8.76239e+06	14.99	8.76239e+06	0.3192
60	-14	0	62.5	E	v3	61	14	0	63.5	E	v0	8.39409e+06	14.99	8.39409e+06	2.1326
60	-11	0	62.5	E	v3	61	11	0	63.5	E	v0	8.39393e+06	14.99	8.39393e+06	1.0642
60	-11	0	62.5	E	v3	59	11	0	61.5	E	v0	8.76224e+06	14.99	8.76224e+06	2.378
60	-8	0	62.5	E	v3	61	8	0	63.5	E	v0	8.3938e+06	14.99	8.3938e+06	0.368
61	0	0	63.5	A2	v3	60	0	0	62.5	A1	v0	8.76493e+06	14.99	8.76492e+06	6.3508
61	0	0	63.5	A2	v3	62	0	0	64.5	A1	v0	8.39051e+06	14.99	8.3905e+06	2.8464
61	6	0	63.5	A2	v3	62	6	0	64.5	A1	v0	8.39057e+06	14.99	8.39058e+06	-8.8647
61	6	0	63.5	A2	v3	60	6	0	62.5	A1	v0	8.76498e+06	14.99	8.765e+06	-16.8395
61	9	0	63.5	A1	v3	60	9	0	62.5	A2	v0	8.76508e+06	14.99	8.76509e+06	-2.0209
61	9	0	63.5	A1	v3	62	9	0	64.5	A2	v0	8.39068e+06	14.99	8.39068e+06	-0.2329
61	10	0	63.5	E	v3	60	10	0	62.5	E	v0	8.76513e+06	14.99	8.76512e+06	4.4462
61	10	0	63.5	E	v3	62	10	0	64.5	E	v0	8.39072e+06	14.99	8.39072e+06	-0.2485
61	12	0	63.5	A2	v3	62	12	0	64.5	A1	v0	8.39082e+06	14.99	8.39082e+06	-0.5055
61	12	0	63.5	A2	v3	60	12	0	62.5	A1	v0	8.76521e+06	14.99	8.76521e+06	-0.0476
61	13	0	63.5	E	v3	62	13	0	64.5	E	v0	8.39087e+06	14.99	8.39088e+06	-3.3565
61	13	0	63.5	E	v3	60	13	0	62.5	E	v0	8.76526e+06	14.99	8.76526e+06	-0.7272
61	15	0	63.5	A1	v3	62	15	0	64.5	A2	v0	8.391e+06	14.99	8.391e+06	3.1431
61	15	0	63.5	A1	v3	60	15	0	62.5	A2	v0	8.76537e+06	14.99	8.76537e+06	-0.4919
61	16	0	63.5	E	v3	62	16	0	64.5	E	v0	8.39107e+06	14.99	8.39106e+06	1.5211
61	16	0	63.5	E	v3	60	16	0	62.5	E	v0	8.76543e+06	14.99	8.76543e+06	0.8428
61	18	0	63.5	A2	v3	62	18	0	64.5	A1	v0	8.39122e+06	14.99	8.39121e+06	4.7678
61	18	0	63.5	A2	v3	60	18	0	62.5	A1	v0	8.76556e+06	14.99	8.76556e+06	-2.1035
61	19	0	63.5	E	v3	62	19	0	64.5	E	v0	8.39129e+06	14.99	8.39129e+06	3.798
61	19	0	63.5	E	v3	60	19	0	62.5	E	v0	8.76563e+06	14.99	8.76563e+06	2.1675
61	21	0	63.5	A1	v3	62	21	0	64.5	A2	v0	8.39146e+06	14.99	8.39146e+06	5.8161
61	21	0	63.5	A1	v3	60	21	0	62.5	A2	v0	8.76578e+06	14.99	8.76578e+06	0.7622
61	22	0	63.5	E	v3	62	22	0	64.5	E	v0	8.39155e+06	14.99	8.39155e+06	2.7123
61	22	0	63.5	E	v3	60	22	0	62.5	E	v0	8.76586e+06	14.99	8.76586e+06	0.3867
61	24	0	63.5	A2	v3	60	24	0	62.5	A1	v0	8.76602e+06	14.99	8.76602e+06	-2.4274
61	24	0	63.5	A2	v3	62	24	0	64.5	A1	v0	8.39174e+06	14.99	8.39174e+06	0.8513
61	25	0	63.5	E	v3	60	25	0	62.5	E	v0	8.76611e+06	14.99	8.76611e+06	-4.3027
61	25	0	63.5	E	v3	62	25	0	64.5	E	v0	8.39184e+06	14.99	8.39184e+06	5.3554
61	27	0	63.5	A1	v3	60	27	0	62.5	A2	v0	8.76629e+06	14.99	8.7663e+06	-6.1439
61	27	0	63.5	A1	v3	62	27	0	64.5	A2	v0	8.39204e+06	14.99	8.39204e+06	0.7977
61	28	0	63.5	E	v3	62	28	0	64.5	E	v0	8.39216e+06	14.99	8.39215e+06	5.5684
61	28	0	63.5	E	v3	60	28	0	62.5	E	v0	8.76639e+06	14.99	8.76639e+06	-0.3716
61	30	0	63.5	A2	v3	62	30	0	64.5	A1	v0	8.39237e+06	14.99	8.39237e+06	-4.6052
61	30	0	63.5	A2	v3	60	30	0	62.5	A1	v0	8.76657e+06	14.99	8.76659e+06	-13.1526
61	-29	0	63.5	E	v3	60	29	0	62.5	E	v0	8.76648e+06	14.99	8.76649e+06	-10.9734
61	-26	0	63.5	E	v3	60	26	0	62.5	E	v0	8.7662e+06	14.99	8.7662e+06	-5.3959
61	-23	0	63.5	E	v3	62	23	0	64.5	E	v0	8.39164e+06	14.99	8.39164e+06	4.6129
61	-23	0	63.5	E	v3	60	23	0	62.5	E	v0	8.76594e+06	14.99	8.76594e+06	-0.2189
61	-20	0	63.5	E	v3	62	20	0	64.5	E	v0	8.39138e+06	14.99	8.39137e+06	3.6153
61	-20	0	63.5	E	v3	60	20	0	62.5	E	v0	8.7657e+06	14.99	8.7657e+06	1.0915
61	-17	0	63.5	E	v3	62	17	0	64.5	E	v0	8.39114e+06	14.99	8.39114e+06	4.6358
61	-17	0	63.5	E	v3	60	17	0	62.5	E	v0	8.76549e+06	14.99	8.76549e+06	-0.4191
61	-14	0	63.5	E	v3	62	14	0	64.5	E	v0	8.39093e+06	14.99	8.39094e+06	-2.5591
61	-14	0	63.5	E	v3	60	14	0	62.5	E	v0	8.76531e+06	14.99	8.76531e+06	0.3048
61	-11	0	63.5	E	v3	62	11	0	64.5	E	v0	8.39077e+06	14.99	8.39077e+06	-3.651
61	-11	0	63.5	E	v3	60	11	0	62.5	E	v0	8.76517e+06	14.99	8.76516e+06	1.9923
61	-8	0	63.5	E	v3	62	8	0	64.5	E	v0	8.39065e+06	14.99	8.39065e+06	2.3547
62	0	0	64.5	A1	v3	63	0	0	65.5	A2	v0	8.38734e+06	14.99	8.38734e+06	3.3121
62	0	0	64.5	A1	v3	61	0	0	63.5	A2	v0	8.76784e+06	14.99	8.76784e+06	6.5736
62	6	0	64.5	A1	v3	61	6	0	63.5	A2	v0	8.7679e+06	14.99	8.76791e+06	-15.6934
62	6	0	64.5	A1	v3	63	6	0	65.5	A2	v0	8.38741e+06	14.99	8.38742e+06	-8.5404
62	9	0	64.5	A2	v3	63	9	0	65.5	A1	v0	8.38752e+06	14.99	8.38752e+06	-0.5666
62	9	0	64.5	A2	v3	61	9	0	63.5	A1	v0	8.768e+06	14.99	8.768e+06	-1.6258
62	10	0	64.5	E	v3	63	10	0	65.5	E	v0	8.38757e+06	14.99	8.38757e+06	1.0678
62	10	0	64.5	E	v3	61	10	0	63.5	E	v0	8.76804e+06	14.99	8.76804e+06	2.3817
62	12	0	64.5	A1	v3	63	12	0	65.5	A2	v0	8.38767e+06	14.99	8.38766e+06	1.9565
62	12	0	64.5	A1	v3	61	12	0	63.5	A2	v0	8.76813e+06	14.99	8.76813e+06	-0.4644
62	13	0	64.5	E	v3	61	13	0	63.5	E	v0	8.76818e+06	14.99	8.76818e+06	-1.8384
62	13	0	64.5	E	v3	63	13	0	65.5	E	v0	8.38772e+06	14.99	8.38772e+06	-3.2027
62	15	0	64.5	A2	v3	63	15	0	65.5	A1	v0	8.38785e+06	14.99	8.38785e+06	3.0967
62	15	0	64.5	A2	v3	61	15	0	63.5	A1	v0	8.76829e+06	14.99	8.76829e+06	-1.8456
62	16	0	64.5	E	v3	61	16	0	63.5	E	v0	8.76835e+06	14.99	8.76835e+06	-2.4643
62	16	0	64.5	E	v3	63	16	0	65.5	E	v0	8.38792e+06	14.99	8.38791e+06	7.1737
62	18	0	64.5	A1	v3	61	18	0	63.5	A2	v0	8.76849e+06	14.99	8.76849e+06	2.2886
62	18	0	64.5	A1	v3	63	18	0	65.5	A2	v0	8.38807e+06	14.99	8.38806e+06	1.0184
62	19	0	64.5	E	v3	61	19	0	63.5	E	v0	8.76856e+06	14.99	8.76856e+06	4.2113
62	19	0	64.5	E	v3	63	19	0	65.5	E	v0	8.38815e+06	14.99	8.38815e+06	3.2266
62	21	0	64.5	A2	v3	63	21	0	65.5	A1	v0	8.38832e+06	14.99	8.38832e+06	3.3485
62	21	0	64.5	A2	v3	61	21	0	63.5	A1	v0	8.76871e+06	14.99	8.76871e+06	-1.1208
62	22	0	64.5	E	v3	61	22	0	63.5	E	v0	8.76879e+06	14.99	8.7688e+06	-5.7845
62	22	0	64.5	E	v3	63	22	0	65.5	E	v0	8.38841e+06	14.99	8.38841e+06	4.1531
62	24	0	64.5	A1	v3	63	24	0	65.5	A2	v0	8.38861e+06	14.99	8.38861e+06	1.5008
62	24	0	64.5	A1	v3	61	24	0	63.5	A2	v0	8.76897e+06	14.99	8.76897e+06	1.5256
62	25	0	64.5	E	v3	61	25	0	63.5	E	v0	8.76906e+06	14.99	8.76906e+06	-3.9402
62	25	0	64.5	E	v3	63	25	0	65.5	E	v0	8.38871e+06	14.99	8.38871e+06	4.288
62	27	0	64.5	A2	v3	61	27	0	63.5	A1	v0	8.76924e+06	14.99	8.76925e+06	-8.1228
62	27	0	64.5	A2	v3	63	27	0	65.5	A1	v0	8.38893e+06	14.99	8.38892e+06	4.406
62	28	0	64.5	E	v3	63	28	0	65.5	E	v0	8.38904e+06	14.99	8.38903e+06	10.7477
62	28	0	64.5	E	v3	61	28	0	63.5	E	v0	8.76934e+06	14.99	8.76935e+06	-8.0217
62	30	0	64.5	A1	v3	61	30	0	63.5	A2	v0	8.76954e+06	14.99	8.76955e+06	-13.0078
62	30	0	64.5	A1	v3	63	30	0	65.5	A2	v0	8.38927e+06	14.99	8.38926e+06	2.1401
62	-29	0	64.5	E	v3	63	29	0	65.5	E	v0	8.38912e+06	14.99	8.38915e+06	-25.1491
62	-29	0	64.5	E	v3	61	29	0	63.5	E	v0	8.76943e+06	14.99	8.76945e+06	-21.2079
62	-26	0	64.5	E	v3	61	26	0	63.5	E	v0	8.76914e+06	14.99	8.76915e+06	-14.5031
62	-23	0	64.5	E	v3	61	23	0	63.5	E	v0	8.76888e+06	14.99	8.76888e+06	2.353
62	-23	0	64.5	E	v3	63	23	0	65.5	E	v0	8.38851e+06	14.99	8.38851e+06	0.7994
62	-20	0	64.5	E	v3	63	20	0	65.5	E	v0	8.38824e+06	14.99	8.38823e+06	5.4715
62	-20	0	64.5	E	v3	61	20	0	63.5	E	v0	8.76864e+06	14.99	8.76864e+06	3.9435
62	-17	0	64.5	E	v3	63	17	0	65.5	E	v0	8.388e+06	14.99	8.38799e+06	8.3559
62	-17	0	64.5	E	v3	61	17	0	63.5	E	v0	8.76842e+06	14.99	8.76842e+06	0.7887
62	-14	0	64.5	E	v3	63	14	0	65.5	E	v0	8.38778e+06	14.99	8.38778e+06	1.1567
62	-14	0	64.5	E	v3	61	14	0	63.5	E	v0	8.76823e+06	14.99	8.76823e+06	-7.0134
62	-11	0	64.5	E	v3	61	11	0	63.5	E	v0	8.76808e+06	14.99	8.76808e+06	-2.9404
62	-11	0	64.5	E	v3	63	11	0	65.5	E	v0	8.38761e+06	14.99	8.38761e+06	-2.3014
62	-8	0	64.5	E	v3	61	8	0	63.5	E	v0	8.76797e+06	14.99	8.76797e+06	-2.4067
62	-8	0	64.5	E	v3	63	8	0	65.5	E	v0	8.38748e+06	14.99	8.38748e+06	0.555
63	0	0	65.5	A2	v3	64	0	0	66.5	A1	v0	8.38418e+06	14.99	8.38417e+06	6.9369
63	0	0	65.5	A2	v3	62	0	0	64.5	A1	v0	8.77076e+06	14.99	8.77075e+06	8.0505
63	6	0	65.5	A2	v3	62	6	0	64.5	A1	v0	8.77081e+06	14.99	8.77082e+06	-10.0224
63	6	0	65.5	A2	v3	64	6	0	66.5	A1	v0	8.38425e+06	14.99	8.38426e+06	-7.7809
63	9	0	65.5	A1	v3	64	9	0	66.5	A2	v0	8.38436e+06	14.99	8.38436e+06	0.7014
63	9	0	65.5	A1	v3	62	9	0	64.5	A2	v0	8.77092e+06	14.99	8.77092e+06	1.4611
63	10	0	65.5	E	v3	62	10	0	64.5	E	v0	8.77096e+06	14.99	8.77096e+06	-0.6031
63	10	0	65.5	E	v3	64	10	0	66.5	E	v0	8.3844e+06	14.99	8.3844e+06	-0.225
63	12	0	65.5	A2	v3	62	12	0	64.5	A1	v0	8.77105e+06	14.99	8.77105e+06	-1.8355
63	12	0	65.5	A2	v3	64	12	0	66.5	A1	v0	8.38451e+06	14.99	8.38451e+06	0.8777
63	13	0	65.5	E	v3	64	13	0	66.5	E	v0	8.38456e+06	14.99	8384564	-0.9122
63	13	0	65.5	E	v3	62	13	0	64.5	E	v0	8.7711e+06	14.99	8.7711e+06	-1.525
63	15	0	65.5	A1	v3	64	15	0	66.5	A2	v0	8.38469e+06	14.99	8.38469e+06	2.1473
63	15	0	65.5	A1	v3	62	15	0	64.5	A2	v0	8.77121e+06	14.99	8.77122e+06	-1.2192
63	16	0	65.5	E	v3	64	16	0	66.5	E	v0	8.38477e+06	14.99	8.38476e+06	4.4047
63	16	0	65.5	E	v3	62	16	0	64.5	E	v0	8.77128e+06	14.99	8.77128e+06	3.3792
63	18	0	65.5	A2	v3	64	18	0	66.5	A1	v0	8.38492e+06	14.99	8.38492e+06	1.6868
63	18	0	65.5	A2	v3	62	18	0	64.5	A1	v0	8.77142e+06	14.99	8.77142e+06	1.0866
63	19	0	65.5	E	v3	62	19	0	64.5	E	v0	8.77149e+06	14.99	8.77149e+06	3.6289
63	19	0	65.5	E	v3	64	19	0	66.5	E	v0	8.38501e+06	14.99	8.385e+06	9.4423
63	21	0	65.5	A1	v3	62	21	0	64.5	A2	v0	8.77165e+06	14.99	8.77165e+06	0.0002
63	21	0	65.5	A1	v3	64	21	0	66.5	A2	v0	8.38518e+06	14.99	8.38518e+06	6.7059
63	22	0	65.5	E	v3	62	22	0	64.5	E	v0	8.77173e+06	14.99	8.77173e+06	-2.0928
63	22	0	65.5	E	v3	64	22	0	66.5	E	v0	8.38528e+06	14.99	8.38527e+06	6.8875
63	24	0	65.5	A2	v3	64	24	0	66.5	A1	v0	8.38548e+06	14.99	8.38547e+06	3.0693
63	24	0	65.5	A2	v3	62	24	0	64.5	A1	v0	8.77191e+06	14.99	8.77191e+06	-2.7246
63	25	0	65.5	E	v3	62	25	0	64.5	E	v0	8.772e+06	14.99	8.77201e+06	-4.0284
63	25	0	65.5	E	v3	64	25	0	66.5	E	v0	8.38558e+06	14.99	8.38558e+06	-0.0981
63	27	0	65.5	A1	v3	64	27	0	66.5	A2	v0	8.3858e+06	14.99	8.3858e+06	0.7069
63	27	0	65.5	A1	v3	62	27	0	64.5	A2	v0	8.77219e+06	14.99	8.7722e+06	-10.348
63	28	0	65.5	E	v3	64	28	0	66.5	E	v0	8.38592e+06	14.99	8.38592e+06	1.0815
63	28	0	65.5	E	v3	62	28	0	64.5	E	v0	8.7723e+06	14.99	8.7723e+06	-5.7705
63	30	0	65.5	A2	v3	64	30	0	66.5	A1	v0	8.38616e+06	14.99	8.38616e+06	0.2333
63	30	0	65.5	A2	v3	62	30	0	64.5	A1	v0	8.7725e+06	14.99	8.77252e+06	-11.1629
63	-29	0	65.5	E	v3	62	29	0	64.5	E	v0	8.77241e+06	14.99	8.77241e+06	-3.9057
63	-29	0	65.5	E	v3	64	29	0	66.5	E	v0	8.38603e+06	14.99	8.38603e+06	0.3619
63	-26	0	65.5	E	v3	62	26	0	64.5	E	v0	8.7721e+06	14.99	8.7721e+06	1.0633
63	-23	0	65.5	E	v3	64	23	0	66.5	E	v0	8.38537e+06	14.99	8.38537e+06	2.4404
63	-23	0	65.5	E	v3	62	23	0	64.5	E	v0	8.77182e+06	14.99	8.77182e+06	0.3594
63	-20	0	65.5	E	v3	62	20	0	64.5	E	v0	8.77157e+06	14.99	8.77157e+06	1.7389
63	-20	0	65.5	E	v3	64	20	0	66.5	E	v0	8.3851e+06	14.99	8.38509e+06	8.6882
63	-17	0	65.5	E	v3	64	17	0	66.5	E	v0	8.38484e+06	14.99	8.38484e+06	4.8285
63	-17	0	65.5	E	v3	62	17	0	64.5	E	v0	8.77135e+06	14.99	8.77135e+06	0.0283
63	-14	0	65.5	E	v3	62	14	0	64.5	E	v0	8.77116e+06	14.99	8.77116e+06	3.86
63	-14	0	65.5	E	v3	64	14	0	66.5	E	v0	8.38462e+06	14.99	8.38463e+06	-1.1055
63	-11	0	65.5	E	v3	64	11	0	66.5	E	v0	8.38445e+06	14.99	8.38445e+06	-1.1779
63	-11	0	65.5	E	v3	62	11	0	64.5	E	v0	8.771e+06	14.99	8.771e+06	-1.0148
63	-8	0	65.5	E	v3	62	8	0	64.5	E	v0	8.77088e+06	14.99	8.77088e+06	-1.1507
63	-8	0	65.5	E	v3	64	8	0	66.5	E	v0	8.38432e+06	14.99	8.38432e+06	-1.1297
64	0	0	66.5	A1	v3	65	0	0	67.5	A2	v0	8.38101e+06	14.99	8.381e+06	7.1297
64	0	0	66.5	A1	v3	63	0	0	65.5	A2	v0	8.77366e+06	14.99	8.77366e+06	2.1001
64	6	0	66.5	A1	v3	63	6	0	65.5	A2	v0	8.77373e+06	14.99	8.77373e+06	-2.5122
64	6	0	66.5	A1	v3	65	6	0	67.5	A2	v0	8.38108e+06	14.99	8.38109e+06	-7.1814
64	9	0	66.5	A2	v3	63	9	0	65.5	A1	v0	8.77383e+06	14.99	8.77383e+06	-1.1415
64	9	0	66.5	A2	v3	65	9	0	67.5	A1	v0	8.38119e+06	14.99	8.3812e+06	-2.7197
64	10	0	66.5	E	v3	63	10	0	65.5	E	v0	8.77387e+06	14.99	8.77387e+06	1.5006
64	10	0	66.5	E	v3	65	10	0	67.5	E	v0	8.38124e+06	14.99	8.38124e+06	-1.1243
64	12	0	66.5	A1	v3	63	12	0	65.5	A2	v0	8.77397e+06	14.99	8.77396e+06	0.9488
64	12	0	66.5	A1	v3	65	12	0	67.5	A2	v0	8.38135e+06	14.99	8.38135e+06	-0.7391
64	13	0	66.5	E	v3	63	13	0	65.5	E	v0	8.77401e+06	14.99	8.77402e+06	-5.7694
64	13	0	66.5	E	v3	65	13	0	67.5	E	v0	8.3814e+06	14.99	8.38141e+06	-1.2767
64	15	0	66.5	A2	v3	63	15	0	65.5	A1	v0	8.77414e+06	14.99	8.77414e+06	0.202
64	15	0	66.5	A2	v3	65	15	0	67.5	A1	v0	8.38154e+06	14.99	8.38154e+06	1.7988
64	16	0	66.5	E	v3	63	16	0	65.5	E	v0	8.7742e+06	14.99	8.7742e+06	1.299
64	16	0	66.5	E	v3	65	16	0	67.5	E	v0	8.38162e+06	14.99	8.38161e+06	7.9096
64	18	0	66.5	A1	v3	63	18	0	65.5	A2	v0	8.77435e+06	14.99	8.77434e+06	4.7978
64	18	0	66.5	A1	v3	65	18	0	67.5	A2	v0	8.38177e+06	14.99	8.38177e+06	3.1808
64	19	0	66.5	E	v3	65	19	0	67.5	E	v0	8.38186e+06	14.99	8.38185e+06	9.2602
64	19	0	66.5	E	v3	63	19	0	65.5	E	v0	8.77442e+06	14.99	8.77442e+06	1.6342
64	21	0	66.5	A2	v3	63	21	0	65.5	A1	v0	8.77458e+06	14.99	8.77458e+06	2.0416
64	21	0	66.5	A2	v3	65	21	0	67.5	A1	v0	8.38204e+06	14.99	8.38204e+06	0.6048
64	22	0	66.5	E	v3	65	22	0	67.5	E	v0	8.38214e+06	14.99	8.38213e+06	1.928
64	22	0	66.5	E	v3	63	22	0	65.5	E	v0	8.77466e+06	14.99	8.77467e+06	-3.8118
64	24	0	66.5	A1	v3	63	24	0	65.5	A2	v0	8.77485e+06	14.99	8.77485e+06	1.0276
64	24	0	66.5	A1	v3	65	24	0	67.5	A2	v0	8.38234e+06	14.99	8.38234e+06	3.1651
64	25	0	66.5	E	v3	65	25	0	67.5	E	v0	8.38246e+06	14.99	8.38245e+06	7.1929
64	25	0	66.5	E	v3	63	25	0	65.5	E	v0	8.77495e+06	14.99	8.77495e+06	2.6435
64	27	0	66.5	A2	v3	63	27	0	65.5	A1	v0	8.77514e+06	14.99	8.77515e+06	-10.3985
64	27	0	66.5	A2	v3	65	27	0	67.5	A1	v0	8.38268e+06	14.99	8.38268e+06	-1.8928
64	28	0	66.5	E	v3	65	28	0	67.5	E	v0	8.38281e+06	14.99	8.3828e+06	8.6555
64	28	0	66.5	E	v3	63	28	0	65.5	E	v0	8.77525e+06	14.99	8.77526e+06	-7.99
64	30	0	66.5	A1	v3	65	30	0	67.5	A2	v0	8.38304e+06	14.99	8.38304e+06	-8.8175
64	30	0	66.5	A1	v3	63	30	0	65.5	A2	v0	8.77546e+06	14.99	8.77548e+06	-13.594
64	-29	0	66.5	E	v3	63	29	0	65.5	E	v0	8.77536e+06	14.99	8.77537e+06	-9.1131
64	-29	0	66.5	E	v3	65	29	0	67.5	E	v0	8.38293e+06	14.99	8.38292e+06	5.8896
64	-26	0	66.5	E	v3	65	26	0	67.5	E	v0	8.38256e+06	14.99	8.38256e+06	-0.4322
64	-23	0	66.5	E	v3	63	23	0	65.5	E	v0	8.77476e+06	14.99	8.77476e+06	-0.487
64	-23	0	66.5	E	v3	65	23	0	67.5	E	v0	8.38224e+06	14.99	8.38223e+06	3.5461
64	-20	0	66.5	E	v3	63	20	0	65.5	E	v0	8.7745e+06	14.99	8.7745e+06	2.2874
64	-20	0	66.5	E	v3	65	20	0	67.5	E	v0	8.38195e+06	14.99	8.38194e+06	8.7743
64	-17	0	66.5	E	v3	65	17	0	67.5	E	v0	8.38169e+06	14.99	8.38169e+06	5.4515
64	-17	0	66.5	E	v3	63	17	0	65.5	E	v0	8.77427e+06	14.99	8.77427e+06	1.2112
64	-14	0	66.5	E	v3	65	14	0	67.5	E	v0	8.38147e+06	14.99	8.38147e+06	1.4523
64	-14	0	66.5	E	v3	63	14	0	65.5	E	v0	8.77408e+06	14.99	8.77407e+06	0.8611
64	-11	0	66.5	E	v3	63	11	0	65.5	E	v0	8.77391e+06	14.99	8.77392e+06	-1.2118
64	-11	0	66.5	E	v3	65	11	0	67.5	E	v0	8.3813e+06	14.99	8.38129e+06	3.6216
64	-8	0	66.5	E	v3	65	8	0	67.5	E	v0	8.38116e+06	14.99	8.38116e+06	2.1021
65	0	0	67.5	A2	v3	66	0	0	68.5	A1	v0	8.37784e+06	14.99	8.37783e+06	6.5931
65	0	0	67.5	A2	v3	64	0	0	66.5	A1	v0	8.77657e+06	14.99	8.77656e+06	4.3239
65	6	0	67.5	A2	v3	66	6	0	68.5	A1	v0	8.37791e+06	14.99	8.37792e+06	-7.9363
65	6	0	67.5	A2	v3	64	6	0	66.5	A1	v0	8.77664e+06	14.99	8.77664e+06	-4.8421
65	7	0	67.5	E	v3	66	7	0	68.5	E	v0	8.37795e+06	14.99	8.37795e+06	-1.3659
65	9	0	67.5	A1	v3	64	9	0	66.5	A2	v0	8.77674e+06	14.99	8.77674e+06	2.8708
65	9	0	67.5	A1	v3	66	9	0	68.5	A2	v0	8.37803e+06	14.99	8.37803e+06	-0.0327
65	10	0	67.5	E	v3	64	10	0	66.5	E	v0	8.77678e+06	14.99	8.77678e+06	0.9113
65	10	0	67.5	E	v3	66	10	0	68.5	E	v0	8.37807e+06	14.99	8.37808e+06	-6.4218
65	12	0	67.5	A2	v3	64	12	0	66.5	A1	v0	8.77688e+06	14.99	8.77688e+06	1.3064
65	12	0	67.5	A2	v3	66	12	0	68.5	A1	v0	8.37818e+06	14.99	8.37818e+06	0.1089
65	13	0	67.5	E	v3	64	13	0	66.5	E	v0	8.77692e+06	14.99	8.77693e+06	-8.2626
65	13	0	67.5	E	v3	66	13	0	68.5	E	v0	8.37824e+06	14.99	8.37824e+06	-2.1925
65	15	0	67.5	A1	v3	64	15	0	66.5	A2	v0	8.77705e+06	14.99	8.77705e+06	-0.5663
65	15	0	67.5	A1	v3	66	15	0	68.5	A2	v0	8.37838e+06	14.99	8.37838e+06	1.757
65	16	0	67.5	E	v3	64	16	0	66.5	E	v0	8.77713e+06	14.99	8.77712e+06	5.3993
65	16	0	67.5	E	v3	66	16	0	68.5	E	v0	8.37846e+06	14.99	8.37845e+06	5.1023
65	18	0	67.5	A2	v3	64	18	0	66.5	A1	v0	8.77726e+06	14.99	8.77727e+06	-0.3538
65	18	0	67.5	A2	v3	66	18	0	68.5	A1	v0	8.37862e+06	14.99	8.37862e+06	2.8081
65	19	0	67.5	E	v3	66	19	0	68.5	E	v0	8.37871e+06	14.99	8.3787e+06	4.4848
65	19	0	67.5	E	v3	64	19	0	66.5	E	v0	8.77734e+06	14.99	8.77734e+06	-0.2592
65	21	0	67.5	A1	v3	64	21	0	66.5	A2	v0	8.77751e+06	14.99	8.77751e+06	-1.5767
65	21	0	67.5	A1	v3	66	21	0	68.5	A2	v0	8.3789e+06	14.99	8.37889e+06	4.8379
65	22	0	67.5	E	v3	64	22	0	66.5	E	v0	8.7776e+06	14.99	8.7776e+06	-3.1314
65	22	0	67.5	E	v3	66	22	0	68.5	E	v0	8.379e+06	14.99	8.37899e+06	9.3673
65	24	0	67.5	A2	v3	66	24	0	68.5	A1	v0	8.37921e+06	14.99	8.3792e+06	5.9921
65	24	0	67.5	A2	v3	64	24	0	66.5	A1	v0	8.77779e+06	14.99	8.77779e+06	-5.1894
65	25	0	67.5	E	v3	66	25	0	68.5	E	v0	8.37932e+06	14.99	8.37932e+06	-0.5095
65	27	0	67.5	A1	v3	66	27	0	68.5	A2	v0	8.37956e+06	14.99	8.37955e+06	2.0102
65	27	0	67.5	A1	v3	64	27	0	66.5	A2	v0	8.7781e+06	14.99	8.7781e+06	-5.8592
65	28	0	67.5	E	v3	66	28	0	68.5	E	v0	8.37967e+06	14.99	8.37968e+06	-2.7967
65	28	0	67.5	E	v3	64	28	0	66.5	E	v0	8.7782e+06	14.99	8.77821e+06	-6.2677
65	30	0	67.5	A2	v3	66	30	0	68.5	A1	v0	8.37993e+06	14.99	8.37993e+06	-5.8161
65	30	0	67.5	A2	v3	64	30	0	66.5	A1	v0	8.77843e+06	14.99	8.77844e+06	-10.9879
65	-29	0	67.5	E	v3	64	29	0	66.5	E	v0	8.77831e+06	14.99	8.77832e+06	-8.9304
65	-26	0	67.5	E	v3	66	26	0	68.5	E	v0	8.37944e+06	14.99	8.37943e+06	6.0157
65	-26	0	67.5	E	v3	64	26	0	66.5	E	v0	8.778e+06	14.99	8.778e+06	0.2416
65	-23	0	67.5	E	v3	66	23	0	68.5	E	v0	8.3791e+06	14.99	8.3791e+06	7.7213
65	-23	0	67.5	E	v3	64	23	0	66.5	E	v0	8.77769e+06	14.99	8.77769e+06	-1.3699
65	-20	0	67.5	E	v3	64	20	0	66.5	E	v0	8.77743e+06	14.99	8.77743e+06	-0.6918
65	-20	0	67.5	E	v3	66	20	0	68.5	E	v0	8.3788e+06	14.99	8.3788e+06	3.9372
65	-17	0	67.5	E	v3	64	17	0	66.5	E	v0	8.77719e+06	14.99	8.77719e+06	-4.942
65	-17	0	67.5	E	v3	66	17	0	68.5	E	v0	8.37854e+06	14.99	8.37853e+06	3.3348
65	-14	0	67.5	E	v3	66	14	0	68.5	E	v0	8.37831e+06	14.99	8.37831e+06	1.3401
65	-14	0	67.5	E	v3	64	14	0	66.5	E	v0	8.77699e+06	14.99	8.77699e+06	-0.4074
65	-11	0	67.5	E	v3	66	11	0	68.5	E	v0	8.37813e+06	14.99	8.37813e+06	0.7097
65	-11	0	67.5	E	v3	64	11	0	66.5	E	v0	8.77683e+06	14.99	8.77683e+06	0.9788
65	-8	0	67.5	E	v3	66	8	0	68.5	E	v0	8.37799e+06	14.99	8.37799e+06	0.0621
65	-8	0	67.5	E	v3	64	8	0	66.5	E	v0	8.7767e+06	14.99	8.7767e+06	-0.6665
66	0	0	68.5	A1	v3	67	0	0	69.5	A2	v0	8.37466e+06	14.99	8.37466e+06	3.533
66	0	0	68.5	A1	v3	65	0	0	67.5	A2	v0	8.77947e+06	14.99	8.77947e+06	4.5414
66	6	0	68.5	A1	v3	67	6	0	69.5	A2	v0	8.37475e+06	14.99	8.37475e+06	-5.5442
66	6	0	68.5	A1	v3	65	6	0	67.5	A2	v0	8.77954e+06	14.99	8.77955e+06	-2.9091
66	7	0	68.5	E	v3	67	7	0	69.5	E	v0	8.37478e+06	14.99	8.37478e+06	-0.9163
66	9	0	68.5	A2	v3	65	9	0	67.5	A1	v0	8.77965e+06	14.99	8.77965e+06	-0.5795
66	9	0	68.5	A2	v3	67	9	0	69.5	A1	v0	8.37486e+06	14.99	8.37486e+06	-2.3251
66	10	0	68.5	E	v3	65	10	0	67.5	E	v0	8.77969e+06	14.99	8.77969e+06	-1.4586
66	10	0	68.5	E	v3	67	10	0	69.5	E	v0	8.37491e+06	14.99	8.37491e+06	-2.0226
66	12	0	68.5	A1	v3	67	12	0	69.5	A2	v0	8.37502e+06	14.99	8.37502e+06	1.3284
66	12	0	68.5	A1	v3	65	12	0	67.5	A2	v0	8.77979e+06	14.99	8.77979e+06	1.649
66	13	0	68.5	E	v3	67	13	0	69.5	E	v0	8.37508e+06	14.99	8.37508e+06	2.6411
66	13	0	68.5	E	v3	65	13	0	67.5	E	v0	8.77984e+06	14.99	8.77985e+06	-3.8946
66	15	0	68.5	A2	v3	67	15	0	69.5	A1	v0	8.37522e+06	14.99	8.37522e+06	2.3268
66	15	0	68.5	A2	v3	65	15	0	67.5	A1	v0	8.77997e+06	14.99	8.77997e+06	0.6871
66	16	0	68.5	E	v3	67	16	0	69.5	E	v0	8.3753e+06	14.99	8.3753e+06	3.1836
66	16	0	68.5	E	v3	65	16	0	67.5	E	v0	8.78004e+06	14.99	8.78004e+06	2.5034
66	18	0	68.5	A1	v3	65	18	0	67.5	A2	v0	8.78019e+06	14.99	8.78019e+06	2.1349
66	18	0	68.5	A1	v3	67	18	0	69.5	A2	v0	8.37547e+06	14.99	8.37546e+06	5.9708
66	19	0	68.5	E	v3	67	19	0	69.5	E	v0	8.37556e+06	14.99	8.37555e+06	6.8141
66	19	0	68.5	E	v3	65	19	0	67.5	E	v0	8.78027e+06	14.99	8.78027e+06	1.5611
66	21	0	68.5	A2	v3	65	21	0	67.5	A1	v0	8.78044e+06	14.99	8.78044e+06	-2.1449
66	21	0	68.5	A2	v3	67	21	0	69.5	A1	v0	8.37575e+06	14.99	8.37575e+06	3.2227
66	22	0	68.5	E	v3	67	22	0	69.5	E	v0	8.37585e+06	14.99	8.37585e+06	0.1321
66	22	0	68.5	E	v3	65	22	0	67.5	E	v0	8.78053e+06	14.99	8.78053e+06	-1.5348
66	24	0	68.5	A1	v3	67	24	0	69.5	A2	v0	8.37607e+06	14.99	8.37607e+06	4.0651
66	24	0	68.5	A1	v3	65	24	0	67.5	A2	v0	8.78072e+06	14.99	8.78073e+06	-3.6691
66	25	0	68.5	E	v3	67	25	0	69.5	E	v0	8.37619e+06	14.99	8.37618e+06	2.5796
66	27	0	68.5	A2	v3	67	27	0	69.5	A1	v0	8.37642e+06	14.99	8.37643e+06	-5.8632
66	27	0	68.5	A2	v3	65	27	0	67.5	A1	v0	8.78104e+06	14.99	8.78105e+06	-8.7039
66	28	0	68.5	E	v3	67	28	0	69.5	E	v0	8.37656e+06	14.99	8.37655e+06	3.6078
66	28	0	68.5	E	v3	65	28	0	67.5	E	v0	8.78115e+06	14.99	8.78116e+06	-8.9792
66	30	0	68.5	A1	v3	65	30	0	67.5	A2	v0	8.78139e+06	14.99	8.7814e+06	-8.4212
66	30	0	68.5	A1	v3	67	30	0	69.5	A2	v0	8.37681e+06	14.99	8.37682e+06	-4.5434
66	-29	0	68.5	E	v3	67	29	0	69.5	E	v0	8.37669e+06	14.99	8.37669e+06	5.8969
66	-29	0	68.5	E	v3	65	29	0	67.5	E	v0	8.78126e+06	14.99	8.78128e+06	-17.7285
66	-26	0	68.5	E	v3	67	26	0	69.5	E	v0	8.37631e+06	14.99	8.3763e+06	5.5276
66	-23	0	68.5	E	v3	67	23	0	69.5	E	v0	8.37596e+06	14.99	8.37596e+06	5.379
66	-20	0	68.5	E	v3	67	20	0	69.5	E	v0	8.37565e+06	14.99	8.37565e+06	2.5772
66	-20	0	68.5	E	v3	65	20	0	67.5	E	v0	8.78035e+06	14.99	8.78035e+06	-3.2863
66	-17	0	68.5	E	v3	67	17	0	69.5	E	v0	8.37538e+06	14.99	8.37538e+06	1.7821
66	-17	0	68.5	E	v3	65	17	0	67.5	E	v0	8.78011e+06	14.99	8.78011e+06	3.7676
66	-14	0	68.5	E	v3	65	14	0	67.5	E	v0	8.7799e+06	14.99	8.77991e+06	-1.7306
66	-14	0	68.5	E	v3	67	14	0	69.5	E	v0	8.37515e+06	14.99	8.37515e+06	-2.3359
66	-11	0	68.5	E	v3	65	11	0	67.5	E	v0	8.77973e+06	14.99	8.77974e+06	-4.0234
66	-11	0	68.5	E	v3	67	11	0	69.5	E	v0	8.37496e+06	14.99	8.37496e+06	1.7835
66	-8	0	68.5	E	v3	65	8	0	67.5	E	v0	8.77961e+06	14.99	8.77961e+06	2.185
66	-8	0	68.5	E	v3	67	8	0	69.5	E	v0	8.37482e+06	14.99	8.37482e+06	0.5497
67	0	0	69.5	A2	v3	66	0	0	68.5	A1	v0	8.78238e+06	14.99	8.78237e+06	7.8617
67	0	0	69.5	A2	v3	68	0	0	70.5	A1	v0	8.37149e+06	14.99	8.37149e+06	8.7465
67	6	0	69.5	A2	v3	68	6	0	70.5	A1	v0	8.37157e+06	14.99	8.37158e+06	-3.8975
67	6	0	69.5	A2	v3	66	6	0	68.5	A1	v0	8.78245e+06	59.958	8.78245e+06	-4.7947
67	7	0	69.5	E	v3	68	7	0	70.5	E	v0	8.37161e+06	14.99	8.37161e+06	-3.6194
67	7	0	69.5	E	v3	66	7	0	68.5	E	v0	8.78245e+06	59.958	8.78248e+06	-34.742
67	9	0	69.5	A1	v3	66	9	0	68.5	A2	v0	8.78256e+06	14.99	8.78255e+06	2.0116
67	9	0	69.5	A1	v3	68	9	0	70.5	A2	v0	8.37169e+06	14.99	8.37169e+06	-2.6966
67	10	0	69.5	E	v3	66	10	0	68.5	E	v0	8.7826e+06	14.99	8.7826e+06	2.4984
67	10	0	69.5	E	v3	68	10	0	70.5	E	v0	8.37175e+06	14.99	8.37174e+06	3.0847
67	12	0	69.5	A2	v3	66	12	0	68.5	A1	v0	8.7827e+06	14.99	8.7827e+06	3.4889
67	12	0	69.5	A2	v3	68	12	0	70.5	A1	v0	8.37185e+06	14.99	8.37185e+06	0.826
67	13	0	69.5	E	v3	66	13	0	68.5	E	v0	8.78275e+06	14.99	8.78276e+06	-2.2453
67	13	0	69.5	E	v3	68	13	0	70.5	E	v0	8.37192e+06	14.99	8.37192e+06	0.3384
67	15	0	69.5	A1	v3	68	15	0	70.5	A2	v0	8.37206e+06	14.99	8.37206e+06	4.1136
67	15	0	69.5	A1	v3	66	15	0	68.5	A2	v0	8.78289e+06	14.99	8.78288e+06	2.4768
67	16	0	69.5	E	v3	68	16	0	70.5	E	v0	8.37214e+06	14.99	8.37214e+06	0.0604
67	16	0	69.5	E	v3	66	16	0	68.5	E	v0	8.78295e+06	14.99	8.78295e+06	2.2189
67	18	0	69.5	A2	v3	66	18	0	68.5	A1	v0	8.78311e+06	14.99	8.78311e+06	3.8845
67	18	0	69.5	A2	v3	68	18	0	70.5	A1	v0	8.37231e+06	14.99	8.37231e+06	5.4797
67	19	0	69.5	E	v3	66	19	0	68.5	E	v0	8.78319e+06	14.99	8.78319e+06	4.412
67	19	0	69.5	E	v3	68	19	0	70.5	E	v0	8.3724e+06	14.99	8.3724e+06	-0.8338
67	21	0	69.5	A1	v3	66	21	0	68.5	A2	v0	8.78337e+06	14.99	8.78337e+06	1.5513
67	21	0	69.5	A1	v3	68	21	0	70.5	A2	v0	8.3726e+06	14.99	8.3726e+06	4.4599
67	22	0	69.5	E	v3	66	22	0	68.5	E	v0	8.78345e+06	14.99	8.78346e+06	-7.4002
67	22	0	69.5	E	v3	68	22	0	70.5	E	v0	8.37271e+06	14.99	8.3727e+06	3.309
67	24	0	69.5	A2	v3	66	24	0	68.5	A1	v0	8.78366e+06	14.99	8.78366e+06	-1.5937
67	24	0	69.5	A2	v3	68	24	0	70.5	A1	v0	8.37294e+06	14.99	8.37293e+06	5.4818
67	25	0	69.5	E	v3	66	25	0	68.5	E	v0	8.78376e+06	14.99	8.78377e+06	-13.0475
67	25	0	69.5	E	v3	68	25	0	70.5	E	v0	8.37305e+06	14.99	8.37305e+06	2.6797
67	27	0	69.5	A1	v3	66	27	0	68.5	A2	v0	8.78399e+06	14.99	8.78399e+06	-7.5226
67	27	0	69.5	A1	v3	68	27	0	70.5	A2	v0	8.3733e+06	14.99	8.3733e+06	2.6757
67	28	0	69.5	E	v3	66	28	0	68.5	E	v0	8.7841e+06	14.99	8.78411e+06	-5.9132
67	28	0	69.5	E	v3	68	28	0	70.5	E	v0	8.37342e+06	14.99	8.37343e+06	-14.6923
67	30	0	69.5	A2	v3	68	30	0	70.5	A1	v0	8.3737e+06	14.99	8.37371e+06	-5.5891
67	30	0	69.5	A2	v3	66	30	0	68.5	A1	v0	8.78434e+06	14.99	8.78435e+06	-10.9707
67	-29	0	69.5	E	v3	68	29	0	70.5	E	v0	8.37357e+06	14.99	8.37357e+06	-0.8042
67	-29	0	69.5	E	v3	66	29	0	68.5	E	v0	8.78423e+06	14.99	8.78423e+06	-3.1107
67	-26	0	69.5	E	v3	68	26	0	70.5	E	v0	8.37317e+06	14.99	8.37317e+06	-2.1879
67	-23	0	69.5	E	v3	68	23	0	70.5	E	v0	8.37282e+06	14.99	8.37282e+06	2.2251
67	-23	0	69.5	E	v3	66	23	0	68.5	E	v0	8.78356e+06	14.99	8.78356e+06	-0.4796
67	-20	0	69.5	E	v3	66	20	0	68.5	E	v0	8.78328e+06	14.99	8.78328e+06	3.5131
67	-20	0	69.5	E	v3	68	20	0	70.5	E	v0	8.3725e+06	14.99	8.3725e+06	3.5017
67	-17	0	69.5	E	v3	66	17	0	68.5	E	v0	8.78303e+06	14.99	8.78303e+06	4.2705
67	-17	0	69.5	E	v3	68	17	0	70.5	E	v0	8.37222e+06	14.99	8.37222e+06	3.1975
67	-14	0	69.5	E	v3	66	14	0	68.5	E	v0	8.78282e+06	14.99	8.78282e+06	-0.3966
67	-14	0	69.5	E	v3	68	14	0	70.5	E	v0	8.37199e+06	14.99	8.37199e+06	4.2199
67	-11	0	69.5	E	v3	66	11	0	68.5	E	v0	8.78265e+06	14.99	8.78265e+06	-0.316
67	-11	0	69.5	E	v3	68	11	0	70.5	E	v0	8.37179e+06	14.99	8.3718e+06	-0.9466
67	-8	0	69.5	E	v3	68	8	0	70.5	E	v0	8.37165e+06	14.99	8.37165e+06	1.1716
67	-8	0	69.5	E	v3	66	8	0	68.5	E	v0	8.78251e+06	14.99	8.78252e+06	-0.3017
68	0	0	70.5	A1	v3	67	0	0	69.5	A2	v0	8.78527e+06	14.99	8.78527e+06	5.304
68	0	0	70.5	A1	v3	69	0	0	71.5	A2	v0	8.36831e+06	14.99	8.36831e+06	2.7521
68	6	0	70.5	A1	v3	67	6	0	69.5	A2	v0	8.78534e+06	14.99	8.78535e+06	-7.788
68	6	0	70.5	A1	v3	69	6	0	71.5	A2	v0	8.3684e+06	14.99	8.3684e+06	-4.7899
68	7	0	70.5	E	v3	69	7	0	71.5	E	v0	8.36844e+06	14.99	8.36844e+06	4.02
68	7	0	70.5	E	v3	67	7	0	69.5	E	v0	8.78538e+06	14.99	8.78538e+06	-2.7643
68	9	0	70.5	A2	v3	67	9	0	69.5	A1	v0	8.78546e+06	14.99	8.78546e+06	0.4642
68	9	0	70.5	A2	v3	69	9	0	71.5	A1	v0	8.36852e+06	14.99	8.36852e+06	-1.7418
68	10	0	70.5	E	v3	67	10	0	69.5	E	v0	8.7855e+06	14.99	8.7855e+06	-3.3931
68	10	0	70.5	E	v3	69	10	0	71.5	E	v0	8.36857e+06	14.99	8.36857e+06	-2.4868
68	12	0	70.5	A1	v3	69	12	0	71.5	A2	v0	8.36869e+06	14.99	8.36869e+06	1.6048
68	12	0	70.5	A1	v3	67	12	0	69.5	A2	v0	8.7856e+06	14.99	8.7856e+06	-0.655
68	13	0	70.5	E	v3	69	13	0	71.5	E	v0	8.36875e+06	14.99	8.36875e+06	3.1963
68	13	0	70.5	E	v3	67	13	0	69.5	E	v0	8.78566e+06	14.99	8.78566e+06	-1.8017
68	15	0	70.5	A2	v3	67	15	0	69.5	A1	v0	8.7858e+06	14.99	8.78579e+06	3.0186
68	15	0	70.5	A2	v3	69	15	0	71.5	A1	v0	8.3689e+06	14.99	8.3689e+06	3.5253
68	16	0	70.5	E	v3	69	16	0	71.5	E	v0	8.36898e+06	14.99	8.36898e+06	1.1349
68	16	0	70.5	E	v3	67	16	0	69.5	E	v0	8.78586e+06	14.99	8.78587e+06	-1.1362
68	18	0	70.5	A1	v3	69	18	0	71.5	A2	v0	8.36916e+06	14.99	8.36915e+06	6.138
68	18	0	70.5	A1	v3	67	18	0	69.5	A2	v0	8.78603e+06	14.99	8.78602e+06	2.8109
68	19	0	70.5	E	v3	69	19	0	71.5	E	v0	8.36925e+06	14.99	8.36925e+06	3.1322
68	19	0	70.5	E	v3	67	19	0	69.5	E	v0	8.78611e+06	14.99	8.78611e+06	3.2118
68	21	0	70.5	A2	v3	67	21	0	69.5	A1	v0	8.78629e+06	14.99	8.78629e+06	-0.9652
68	21	0	70.5	A2	v3	69	21	0	71.5	A1	v0	8.36946e+06	14.99	8.36945e+06	6.4576
68	22	0	70.5	E	v3	67	22	0	69.5	E	v0	8.78639e+06	14.99	8.78639e+06	3.5625
68	22	0	70.5	E	v3	69	22	0	71.5	E	v0	8.36956e+06	14.99	8.36956e+06	5.4057
68	24	0	70.5	A1	v3	69	24	0	71.5	A2	v0	8.36979e+06	14.99	8.36979e+06	1.5584
68	24	0	70.5	A1	v3	67	24	0	69.5	A2	v0	8.7866e+06	14.99	8.7866e+06	2.8546
68	25	0	70.5	E	v3	69	25	0	71.5	E	v0	8.36991e+06	14.99	8.36991e+06	1.8973
68	27	0	70.5	A2	v3	67	27	0	69.5	A1	v0	8.78693e+06	14.99	8.78694e+06	-3.1964
68	28	0	70.5	E	v3	69	28	0	71.5	E	v0	8.3703e+06	14.99	8.37031e+06	-8.2224
68	28	0	70.5	E	v3	67	28	0	69.5	E	v0	8.78704e+06	14.99	8.78706e+06	-12.9399
68	30	0	70.5	A1	v3	67	30	0	69.5	A2	v0	8.78729e+06	14.99	8.78731e+06	-16.518
68	-29	0	70.5	E	v3	67	29	0	69.5	E	v0	8.78718e+06	14.99	8.78718e+06	-4.6305
68	-26	0	70.5	E	v3	69	26	0	71.5	E	v0	8.37004e+06	14.99	8.37004e+06	-3.0327
68	-23	0	70.5	E	v3	69	23	0	71.5	E	v0	8.36967e+06	14.99	8.36967e+06	1.8586
68	-23	0	70.5	E	v3	67	23	0	69.5	E	v0	8.78649e+06	14.99	8.78649e+06	-0.7757
68	-20	0	70.5	E	v3	69	20	0	71.5	E	v0	8.36935e+06	14.99	8.36935e+06	1.9204
68	-20	0	70.5	E	v3	67	20	0	69.5	E	v0	8.7862e+06	14.99	8.7862e+06	2.6332
68	-17	0	70.5	E	v3	67	17	0	69.5	E	v0	8.78594e+06	14.99	8.78594e+06	1.3779
68	-17	0	70.5	E	v3	69	17	0	71.5	E	v0	8.36906e+06	14.99	8.36906e+06	3.3899
68	-14	0	70.5	E	v3	69	14	0	71.5	E	v0	8.36883e+06	14.99	8.36882e+06	6.6232
68	-14	0	70.5	E	v3	67	14	0	69.5	E	v0	8.78572e+06	14.99	8.78573e+06	-1.4878
68	-11	0	70.5	E	v3	69	11	0	71.5	E	v0	8.36862e+06	14.99	8.36863e+06	-7.1755
68	-11	0	70.5	E	v3	67	11	0	69.5	E	v0	8.78555e+06	14.99	8.78555e+06	3.4206
68	-8	0	70.5	E	v3	69	8	0	71.5	E	v0	8.36848e+06	14.99	8.36848e+06	1.333
68	-8	0	70.5	E	v3	67	8	0	69.5	E	v0	8.78542e+06	14.99	8.78542e+06	0.5803
69	0	0	71.5	A2	v3	70	0	0	72.5	A1	v0	8.36514e+06	14.99	8.36513e+06	8.6385
69	0	0	71.5	A2	v3	68	0	0	70.5	A1	v0	8.78817e+06	14.99	8.78816e+06	9.7718
69	6	0	71.5	A2	v3	68	6	0	70.5	A1	v0	8.78824e+06	59.958	8.78825e+06	-4.3811
69	6	0	71.5	A2	v3	70	6	0	72.5	A1	v0	8.36522e+06	14.99	8.36523e+06	-3.4198
69	7	0	71.5	E	v3	70	7	0	72.5	E	v0	8.36526e+06	14.99	8.36526e+06	1.6215
69	7	0	71.5	E	v3	68	7	0	70.5	E	v0	8.78824e+06	59.958	8.78828e+06	-35.7465
69	9	0	71.5	A1	v3	68	9	0	70.5	A2	v0	8.78836e+06	14.99	8.78836e+06	-0.112
69	9	0	71.5	A1	v3	70	9	0	72.5	A2	v0	8.36535e+06	14.99	8.36535e+06	-2.1537
69	10	0	71.5	E	v3	70	10	0	72.5	E	v0	8.3654e+06	14.99	8.3654e+06	3.7525
69	10	0	71.5	E	v3	68	10	0	70.5	E	v0	8.7884e+06	14.99	8.7884e+06	-3.5306
69	12	0	71.5	A2	v3	70	12	0	72.5	A1	v0	8.36552e+06	14.99	8.36552e+06	-0.2267
69	12	0	71.5	A2	v3	68	12	0	70.5	A1	v0	8.78851e+06	14.99	8.78851e+06	0.0233
69	13	0	71.5	E	v3	70	13	0	72.5	E	v0	8.36558e+06	14.99	8.36558e+06	-2.8699
69	13	0	71.5	E	v3	68	13	0	70.5	E	v0	8.78857e+06	14.99	8.78857e+06	-3.1499
69	15	0	71.5	A1	v3	70	15	0	72.5	A2	v0	8.36573e+06	14.99	8.36573e+06	0.8677
69	15	0	71.5	A1	v3	68	15	0	70.5	A2	v0	8.78871e+06	14.99	8.7887e+06	4.125
69	16	0	71.5	E	v3	68	16	0	70.5	E	v0	8.78878e+06	14.99	8.78878e+06	4.7439
69	16	0	71.5	E	v3	70	16	0	72.5	E	v0	8.36582e+06	14.99	8.36581e+06	2.2159
69	18	0	71.5	A2	v3	70	18	0	72.5	A1	v0	8.366e+06	14.99	8.36599e+06	4.9537
69	18	0	71.5	A2	v3	68	18	0	70.5	A1	v0	8.78894e+06	14.99	8.78894e+06	2.8264
69	19	0	71.5	E	v3	68	19	0	70.5	E	v0	8.78903e+06	14.99	8.78902e+06	1.2732
69	19	0	71.5	E	v3	70	19	0	72.5	E	v0	8.36609e+06	14.99	8.36609e+06	-2.5664
69	21	0	71.5	A1	v3	68	21	0	70.5	A2	v0	8.78921e+06	14.99	8.78921e+06	-0.0862
69	21	0	71.5	A1	v3	70	21	0	72.5	A2	v0	8.3663e+06	14.99	8.3663e+06	2.3269
69	22	0	71.5	E	v3	68	22	0	70.5	E	v0	8.78931e+06	14.99	8.78931e+06	-7.5762
69	22	0	71.5	E	v3	70	22	0	72.5	E	v0	8.36642e+06	14.99	8.36641e+06	4.3583
69	24	0	71.5	A2	v3	68	24	0	70.5	A1	v0	8.78952e+06	14.99	8.78953e+06	-6.4967
69	24	0	71.5	A2	v3	70	24	0	72.5	A1	v0	8.36665e+06	14.99	8.36665e+06	1.8955
69	25	0	71.5	E	v3	70	25	0	72.5	E	v0	8.36679e+06	14.99	8.36678e+06	12.8313
69	25	0	71.5	E	v3	68	25	0	70.5	E	v0	8.78963e+06	14.99	8.78964e+06	-6.7801
69	27	0	71.5	A1	v3	68	27	0	70.5	A2	v0	8.78987e+06	14.99	8.78988e+06	-8.5987
69	28	0	71.5	E	v3	70	28	0	72.5	E	v0	8.36718e+06	14.99	8.36718e+06	-5.4533
69	28	0	71.5	E	v3	68	28	0	70.5	E	v0	8.78999e+06	14.99	8.79e+06	-8.1559
69	30	0	71.5	A2	v3	68	30	0	70.5	A1	v0	8.79025e+06	14.99	8.79026e+06	-13.6513
69	30	0	71.5	A2	v3	70	30	0	72.5	A1	v0	8.36746e+06	14.99	8.36747e+06	-10.0979
69	-29	0	71.5	E	v3	68	29	0	70.5	E	v0	8.79012e+06	14.99	8.79013e+06	-11.1761
69	-26	0	71.5	E	v3	68	26	0	70.5	E	v0	8.78976e+06	14.99	8.78976e+06	2.084
69	-26	0	71.5	E	v3	70	26	0	72.5	E	v0	8.36691e+06	14.99	8.36691e+06	-0.5956
69	-23	0	71.5	E	v3	68	23	0	70.5	E	v0	8.78941e+06	14.99	8.78942e+06	-4.9391
69	-23	0	71.5	E	v3	70	23	0	72.5	E	v0	8.36653e+06	14.99	8.36653e+06	3.0925
69	-20	0	71.5	E	v3	70	20	0	72.5	E	v0	8.3662e+06	14.99	8.36619e+06	5.3348
69	-20	0	71.5	E	v3	68	20	0	70.5	E	v0	8.78912e+06	14.99	8.78912e+06	7.8801
69	-17	0	71.5	E	v3	68	17	0	70.5	E	v0	8.78886e+06	14.99	8.78885e+06	1.9993
69	-17	0	71.5	E	v3	70	17	0	72.5	E	v0	8.36591e+06	14.99	8.3659e+06	5.3632
69	-14	0	71.5	E	v3	68	14	0	70.5	E	v0	8.78863e+06	14.99	8.78863e+06	0.4056
69	-14	0	71.5	E	v3	70	14	0	72.5	E	v0	8.36566e+06	14.99	8.36565e+06	2.1816
69	-11	0	71.5	E	v3	68	11	0	70.5	E	v0	8.78846e+06	14.99	8.78845e+06	6.3003
69	-11	0	71.5	E	v3	70	11	0	72.5	E	v0	8.36546e+06	14.99	8.36546e+06	1.6892
69	-8	0	71.5	E	v3	70	8	0	72.5	E	v0	8.3653e+06	14.99	8.3653e+06	1.339
69	-8	0	71.5	E	v3	68	8	0	70.5	E	v0	8.78832e+06	14.99	8.78832e+06	-0.5519
70	0	0	72.5	A1	v3	69	0	0	71.5	A2	v0	8.79106e+06	14.99	8.79106e+06	7.4878
70	0	0	72.5	A1	v3	71	0	0	73.5	A2	v0	8.36196e+06	14.99	8.36195e+06	11.7209
70	6	0	72.5	A1	v3	69	6	0	71.5	A2	v0	8.79114e+06	14.99	8.79114e+06	-1.756
70	6	0	72.5	A1	v3	71	6	0	73.5	A2	v0	8.36205e+06	14.99	8.36205e+06	-3.6795
70	7	0	72.5	E	v3	71	7	0	73.5	E	v0	8.36209e+06	14.99	8.36209e+06	0.582
70	9	0	72.5	A2	v3	69	9	0	71.5	A1	v0	8.79125e+06	14.99	8.79126e+06	-1.5023
70	9	0	72.5	A2	v3	71	9	0	73.5	A1	v0	8.36217e+06	14.99	8.36217e+06	-3.0274
70	10	0	72.5	E	v3	71	10	0	73.5	E	v0	8.36222e+06	14.99	8.36223e+06	-0.6765
70	10	0	72.5	E	v3	69	10	0	71.5	E	v0	8.7913e+06	14.99	8.7913e+06	0.6004
70	12	0	72.5	A1	v3	71	12	0	73.5	A2	v0	8.36235e+06	14.99	8.36235e+06	1.6324
70	12	0	72.5	A1	v3	69	12	0	71.5	A2	v0	8.79141e+06	14.99	8.79141e+06	-0.1585
70	13	0	72.5	E	v3	71	13	0	73.5	E	v0	8.36242e+06	14.99	8.36241e+06	3.4308
70	13	0	72.5	E	v3	69	13	0	71.5	E	v0	8.79147e+06	14.99	8.79147e+06	-5.9763
70	15	0	72.5	A2	v3	69	15	0	71.5	A1	v0	8.79161e+06	14.99	8.79161e+06	2.8125
70	15	0	72.5	A2	v3	71	15	0	73.5	A1	v0	8.36257e+06	14.99	8.36257e+06	1.5429
70	16	0	72.5	E	v3	71	16	0	73.5	E	v0	8.36265e+06	14.99	8.36265e+06	3.0097
70	16	0	72.5	E	v3	69	16	0	71.5	E	v0	8.79169e+06	14.99	8.79168e+06	1.5865
70	18	0	72.5	A1	v3	69	18	0	71.5	A2	v0	8.79185e+06	14.99	8.79185e+06	4.8452
70	18	0	72.5	A1	v3	71	18	0	73.5	A2	v0	8.36284e+06	14.99	8.36283e+06	3.7322
70	19	0	72.5	E	v3	69	19	0	71.5	E	v0	8.79195e+06	14.99	8.79194e+06	8.8044
70	19	0	72.5	E	v3	71	19	0	73.5	E	v0	8.36293e+06	14.99	8.36293e+06	0.9637
70	21	0	72.5	A2	v3	69	21	0	71.5	A1	v0	8.79213e+06	14.99	8.79213e+06	3.0082
70	21	0	72.5	A2	v3	71	21	0	73.5	A1	v0	8.36315e+06	14.99	8.36315e+06	4.0694
70	22	0	72.5	E	v3	69	22	0	71.5	E	v0	8.79224e+06	14.99	8.79224e+06	4.7398
70	22	0	72.5	E	v3	71	22	0	73.5	E	v0	8.36327e+06	14.99	8.36326e+06	5.5419
70	24	0	72.5	A1	v3	71	24	0	73.5	A2	v0	8.36351e+06	14.99	8.36351e+06	4.1027
70	24	0	72.5	A1	v3	69	24	0	71.5	A2	v0	8.79245e+06	14.99	8.79245e+06	-0.2511
70	25	0	72.5	E	v3	71	25	0	73.5	E	v0	8.36363e+06	14.99	8.36364e+06	-3.1828
70	25	0	72.5	E	v3	69	25	0	71.5	E	v0	8.79257e+06	14.99	8.79257e+06	-0.5549
70	27	0	72.5	A2	v3	69	27	0	71.5	A1	v0	8.79281e+06	14.99	8.79282e+06	-4.824
70	28	0	72.5	E	v3	69	28	0	71.5	E	v0	8.79293e+06	14.99	8.79295e+06	-11.0291
70	28	0	72.5	E	v3	71	28	0	73.5	E	v0	8.36406e+06	14.99	8.36405e+06	5.3162
70	30	0	72.5	A1	v3	69	30	0	71.5	A2	v0	8.7932e+06	14.99	8.79321e+06	-10.4447
70	30	0	72.5	A1	v3	71	30	0	73.5	A2	v0	8.36434e+06	14.99	8.36435e+06	-18.6369
70	-29	0	72.5	E	v3	69	29	0	71.5	E	v0	8.79307e+06	14.99	8.79308e+06	-11.0366
70	-26	0	72.5	E	v3	69	26	0	71.5	E	v0	8.79269e+06	14.99	8.79269e+06	-3.0039
70	-26	0	72.5	E	v3	71	26	0	73.5	E	v0	8.36377e+06	14.99	8.36377e+06	0.0354
70	-23	0	72.5	E	v3	69	23	0	71.5	E	v0	8.79234e+06	14.99	8.79234e+06	1.735
70	-23	0	72.5	E	v3	71	23	0	73.5	E	v0	8.36339e+06	14.99	8.36338e+06	9.2308
70	-20	0	72.5	E	v3	69	20	0	71.5	E	v0	8.79203e+06	14.99	8.79203e+06	0.9812
70	-20	0	72.5	E	v3	71	20	0	73.5	E	v0	8.36304e+06	14.99	8.36304e+06	7.156
70	-17	0	72.5	E	v3	69	17	0	71.5	E	v0	8.79177e+06	14.99	8.79176e+06	3.1517
70	-17	0	72.5	E	v3	71	17	0	73.5	E	v0	8.36274e+06	14.99	8.36274e+06	-2.8679
70	-14	0	72.5	E	v3	69	14	0	71.5	E	v0	8.79154e+06	14.99	8.79154e+06	-0.3981
70	-14	0	72.5	E	v3	71	14	0	73.5	E	v0	8.36249e+06	14.99	8.36249e+06	6.7897
70	-11	0	72.5	E	v3	69	11	0	71.5	E	v0	8.79136e+06	14.99	8.79135e+06	1.4415
70	-11	0	72.5	E	v3	71	11	0	73.5	E	v0	8.36228e+06	14.99	8.36228e+06	-2.5275
70	-8	0	72.5	E	v3	69	8	0	71.5	E	v0	8.79121e+06	14.99	8.79121e+06	-2.1863
70	-8	0	72.5	E	v3	71	8	0	73.5	E	v0	8.36213e+06	14.99	8.36213e+06	2.094
71	0	0	73.5	A2	v3	72	0	0	74.5	A1	v0	8.35877e+06	14.99	8.35877e+06	5.7088
71	0	0	73.5	A2	v3	70	0	0	72.5	A1	v0	8.79396e+06	14.99	8.79395e+06	8.6577
71	6	0	73.5	A2	v3	72	6	0	74.5	A1	v0	8.35887e+06	14.99	8.35887e+06	-1.6663
71	6	0	73.5	A2	v3	70	6	0	72.5	A1	v0	8.79403e+06	14.99	8.79404e+06	-2.8974
71	7	0	73.5	E	v3	72	7	0	74.5	E	v0	8.3589e+06	14.99	8.35891e+06	-2.6904
71	7	0	73.5	E	v3	70	7	0	72.5	E	v0	8.79407e+06	14.99	8.79407e+06	3.8544
71	9	0	73.5	A1	v3	72	9	0	74.5	A2	v0	8.359e+06	14.99	8.359e+06	0.1393
71	9	0	73.5	A1	v3	70	9	0	72.5	A2	v0	8.79415e+06	14.99	8.79415e+06	-1.8947
71	10	0	73.5	E	v3	70	10	0	72.5	E	v0	8.79419e+06	14.99	8.7942e+06	-4.1774
71	12	0	73.5	A2	v3	70	12	0	72.5	A1	v0	8.79431e+06	14.99	8.79431e+06	-1.7862
71	12	0	73.5	A2	v3	72	12	0	74.5	A1	v0	8.35917e+06	14.99	8.35917e+06	2.9908
71	13	0	73.5	E	v3	70	13	0	72.5	E	v0	8.79437e+06	14.99	8.79437e+06	0.2261
71	13	0	73.5	E	v3	72	13	0	74.5	E	v0	8.35925e+06	14.99	8.35924e+06	6.2151
71	15	0	73.5	A1	v3	70	15	0	72.5	A2	v0	8.79451e+06	14.99	8.79451e+06	1.4936
71	15	0	73.5	A1	v3	72	15	0	74.5	A2	v0	8.3594e+06	14.99	8.3594e+06	2.8588
71	16	0	73.5	E	v3	72	16	0	74.5	E	v0	8.35949e+06	14.99	8.35948e+06	10.4177
71	16	0	73.5	E	v3	70	16	0	72.5	E	v0	8.79459e+06	14.99	8.79459e+06	2.5969
71	18	0	73.5	A2	v3	72	18	0	74.5	A1	v0	8.35968e+06	14.99	8.35967e+06	4.8782
71	18	0	73.5	A2	v3	70	18	0	72.5	A1	v0	8.79476e+06	14.99	8.79476e+06	1.9869
71	19	0	73.5	E	v3	70	19	0	72.5	E	v0	8.79486e+06	14.99	8.79485e+06	4.8351
71	19	0	73.5	E	v3	72	19	0	74.5	E	v0	8.35978e+06	14.99	8.35977e+06	9.5322
71	21	0	73.5	A1	v3	70	21	0	72.5	A2	v0	8.79505e+06	14.99	8.79505e+06	5.3315
71	21	0	73.5	A1	v3	72	21	0	74.5	A2	v0	8.36e+06	14.99	8.35999e+06	3.894
71	22	0	73.5	E	v3	70	22	0	72.5	E	v0	8.79516e+06	14.99	8.79516e+06	0.0645
71	22	0	73.5	E	v3	72	22	0	74.5	E	v0	8.36012e+06	14.99	8.36011e+06	6.8753
[truncated: 1,594 more rows]
